# Supplementary material for: Metal-free sulfonylation of arenes with N-fluorobenzenesulfonimide via cleavage of S–N bonds: expeditious synthesis of diarylsulfones
Source: Royal Society of Chemistry journal article supplement (doi:10.1039/d1ob02209a), 2021-12-17

# Metal-Free Sulfonylation of Arenes with *N*-Fluorobenzenesulfonimide via Cleavage of S-N Bonds: Expeditious Synthesis of Diarylsulfones (Supporting Information)

Xiaohui Zhang,<sup>‡,a</sup> Yueji Feng,<sup>‡,a</sup> Yanyan Tuo,<sup>a</sup> and Qing-Zhong Zheng<sup>\*,a,b</sup>

<sup>a</sup>State Key Laboratory of High-efficiency Utilization of Coal and Green Chemical Engineering, National Demonstration Center for Experimental Chemistry Education, School of Chemistry and Chemical Engineering, Ningxia University, Yinchuan 750021, China

<sup>b</sup>State Key Laboratory of Natural and Biomimetic Drugs, School of Pharmaceutical Sciences, Peking University, Xue Yuan Rd. 38, Beijing 100191, China

E-mail: qzzheng@nxu.edu.cn

## Table of Contents

|                                                                                        |         |
|----------------------------------------------------------------------------------------|---------|
| General remarks                                                                        | S2      |
| Optimization of reaction conditions                                                    | S3      |
| Experimental procedure and characterization data                                       | S4-S13  |
| Structural modification of $\beta$ -estradiol derivative <b>5</b>                      | S14     |
| Synthesis of the intermediate <b>6</b> of an inhibitor of Farnesyl-protein transferase | S14     |
| Gram-scale synthesis of EPAC2 antagonist <b>8</b>                                      | S15     |
| Control Experiments                                                                    | S16     |
| References                                                                             | S17     |
| <sup>1</sup> H NMR, <sup>13</sup> C NMR and <sup>19</sup> F spectra for products       | S18-S79 |

## General remarks

All manipulations were conducted with sealed tubes.  $^1\text{H}$ -NMR spectra were recorded on a Bruker AVIII-400 spectrometers. Chemical shifts (in ppm) were calibrated with Chloroform-d.  $^{13}\text{C}$ -NMR spectra were obtained by using the same NMR spectrometers and were calibrated with Chloroform-d. Analytical thin-layer chromatography (TLC) was conducted with TLC plates (Silica gel 60 F254, Qingdao Haiyang). Flash column chromatography was performed on silica gel 200-300 mesh with freshly distilled solvents. HRMS data were recorded on a maXis UHR-TOF mass spectrometer. Unless otherwise noted, materials obtained from commercial suppliers were used without further purification.

**Table S1. Optimization of reaction conditions (Representative results).<sup>a, b</sup>**

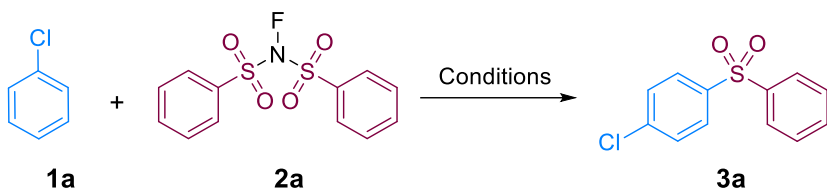

**1a** + **2a**  $\xrightarrow{\text{Conditions}}$  **3a**

| Entry | Acid (1.0 eq)          | Time (h) | Yield <sup>b</sup> (%) |
|-------|------------------------|----------|------------------------|
| 1     | TfOH                   | 48       | 73                     |
| 2     | HCl (36%)              | 48       | 37                     |
| 3     | HNO <sub>3</sub> (65%) | 48       | 65                     |
| 4     | AlCl <sub>3</sub>      | 48       | 32                     |
| 5     | —                      | 48       | —                      |
| 6     | TfOH                   | 30       | 75                     |
| 7     | TfOH                   | 36       | 79                     |
| 8     | TfOH                   | 44       | 75                     |

<sup>a</sup> Reaction conditions: **2a** (1.0 mmol) and acid in **1a** (2 mL) at 130 °C under air.

<sup>b</sup> Isolated yields.

## Experimental procedure and characterization data

### 1) 1-Chloro-4-(phenylsulfonyl)benzene (3a) <sup>[1]</sup>

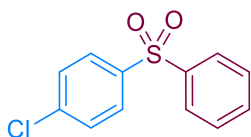

#### Typical procedure:

The reaction of chlorobenzene (2.5 mmol, 281.0 mg), *N*-fluorobenzenesulfonimide (**2a**) (0.5 mmol, 157.7 mg), trifluoromethanesulfonic (150 mol %, 66  $\mu$ L), was carried out in 0.5 mL trifluoroacetic acid at 60 °C under air for 24 h as monitored by TLC. The resulting mixture was concentrated and purified by flash chromatography on silica gel to afford 199.2 mg (79%) of **3a** as solid: <sup>1</sup>H NMR (400 MHz, CDCl<sub>3</sub>)  $\delta$ : 7.93 (dd,  $J$  = 7.6, 1.6 Hz, 2H), 7.89 (dd,  $J$  = 6.8, 2.0 Hz, 2H), 7.58 (d,  $J$  = 7.6 Hz, 1H), 7.52-7.47 (m, 4H). <sup>13</sup>C NMR (100 MHz, CDCl<sub>3</sub>)  $\delta$ : 141.1, 140.0, 139.8, 133.4, 129.5, 129.4, 129.1, 127.6. MS (70 eV):  $m/z$  (%): [M]<sup>+</sup>, 252 (45).

### 2) 1-Fluoro-4-(phenylsulfonyl)benzene (3b) <sup>[2]</sup>

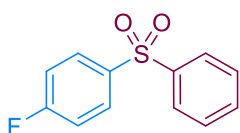

The reaction of fluorobenzene (2.5 mmol, 240.3 mg), *N*-fluorobenzenesulfonimide (**2a**) (0.5 mmol, 157.7 mg), trifluoromethanesulfonic (150 mol %, 66  $\mu$ L), was carried out in 0.5 mL trifluoroacetic acid at 60 °C under air for 24 h as monitored by TLC. The resulting mixture was concentrated and purified by flash chromatography on silica gel to afford 178.7 mg (76%) of **3b** as solid: <sup>1</sup>H NMR (400 MHz, CDCl<sub>3</sub>)  $\delta$ : 7.99-7.93 (m, 4H), 7.58 (d,  $J$  = 6.0 Hz, 1H), 7.57-7.50 (m, 2H), 7.18 (t,  $J$  = 8.8 Hz, 2H). <sup>13</sup>C NMR (100 MHz, CDCl<sub>3</sub>)  $\delta$ : 165.3 (d, <sup>1</sup> $J_{C-F}$  = 254.7 Hz), 141.3, 137.5 (d, <sup>4</sup> $J_{C-F}$  = 2.5 Hz), 133.3, 130.4 (d, <sup>3</sup> $J_{C-F}$  = 9.4 Hz), 129.3, 127.5, 116.5 (d, <sup>2</sup> $J_{C-F}$  = 22.4 Hz). <sup>19</sup>F NMR (376 MHz, CDCl<sub>3</sub>):  $\delta$  -104.2 ppm. MS (70 eV):  $m/z$  (%): [M]<sup>+</sup>, 236 (50).

### 3) 1-Bromo-4-(phenylsulfonyl)benzene (3c) <sup>[2]</sup>

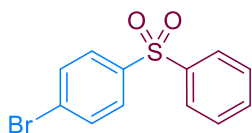

The reaction of bromobenzene (2.5 mmol, 392.5 mg), *N*-fluorobenzenesulfonimide (**2a**) (0.5 mmol, 157.7 mg), trifluoromethanesulfonic (150 mol %, 66  $\mu$ L), was carried out in 0.5 mL trifluoroacetic acid at 100 °C under air for 24 h as monitored by TLC. The resulting mixture was concentrated and purified by flash chromatography on silica gel to afford 203.3 mg (68%) of **3c** as solid.  $^1\text{H}$  NMR (400 MHz,  $\text{CDCl}_3$ )  $\delta$ : 7.92 (t,  $J$  = 1.2 Hz, 2H), 7.81 (dd,  $J$  = 6.4, 2.0 Hz, 2H), 7.65 (dd,  $J$  = 6.8, 2.0 Hz, 2H), 7.58 (d,  $J$  = 7.2 Hz, 1H), 7.52 (dd,  $J$  = 8.0, 7.2 Hz, 2H).  $^{13}\text{C}$  NMR (100 MHz,  $\text{CDCl}_3$ )  $\delta$ : 141.0, 140.6, 133.4, 132.5, 129.4, 129.1, 128.4, 127.6. MS (70 eV):  $m/z$  (%):  $[\text{M}]^+$ , 296 (35).  $[\text{M}]^+$ , 296 (35).

#### 4) 1-Iodo-4-(phenylsulfonyl)benzene (**3d**)<sup>[1]</sup>

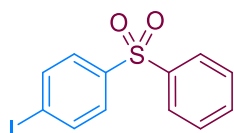

The reaction of iodobenzene (2.5 mmol, 510.0 mg), *N*-fluorobenzenesulfonimide (**2a**) (0.5 mmol, 157.7 mg), trifluoromethanesulfonic (150 mol %, 66  $\mu$ L), was carried out in 0.5 mL trifluoroacetic acid at 100 °C under air for 24 h as monitored by TLC. The resulting mixture was concentrated and purified by flash chromatography on silica gel to afford 218.0 mg (63%) of **3d** as solid.  $^1\text{H}$  NMR (400 MHz,  $\text{CDCl}_3$ )  $\delta$ : 7.93 (dd,  $J$  = 7.6, 1.6 Hz, 2H), 7.86 (dd,  $J$  = 6.4, 2.0 Hz, 2H), 7.65 (dd,  $J$  = 6.8, 2.0 Hz, 2H), 7.58 (d,  $J$  = 7.2 Hz, 1H), 7.52 (dd,  $J$  = 8.4, 6.8 Hz, 2H).  $^{13}\text{C}$  NMR (100 MHz,  $\text{CDCl}_3$ )  $\delta$ : 141.2, 141.0, 138.5, 133.4, 129.3, 129.0, 127.5, 101.0. MS (70 eV):  $m/z$  (%):  $[\text{M}]^+$ , 344 (100).

#### 5) Sulfonyldibenzene (**3e**)<sup>[2]</sup>

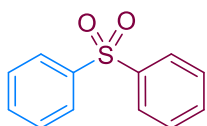

The reaction of benzene (1.25 mmol, 97.6 mg), *N*-fluorobenzenesulfonimide (**2a**) (0.25 mmol, 78.9 mg), trifluoromethanesulfonic (150 mol %, 33  $\mu$ L), was carried out in 0.5 mL trifluoroacetic acid at 60 °C under air for 24 h as monitored by TLC. The resulting mixture was concentrated and purified by flash chromatography on silica gel to afford 158.4 mg (73%) of **3e** as solid.  $^1\text{H}$  NMR (400 MHz,

CDCl<sub>3</sub>)  $\delta$ : 7.95 (dd,  $J$  = 8.0, 1.2 Hz, 4H), 7.56 (dd,  $J$  = 4.0, 1.2 Hz, 2H), 7.51 (dd,  $J$  = 8.0, 7.2 Hz, 4H). <sup>13</sup>C NMR (100 MHz, CDCl<sub>3</sub>)  $\delta$ : 141.4, 133.1, 129.2, 127.6. MS (70 eV):  $m/z$  (%): [M]<sup>+</sup>, 218 (25).

### 6) 1-Methyl-4-(phenylsulfonyl)benzene (**3f**)<sup>[2]</sup>

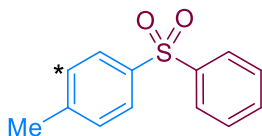

The reaction of toluene (2.5 mmol, 230.4 mg), *N*-fluorobenzenesulfonimide (**2a**) (0.5 mmol, 157.7 mg), trifluoromethanesulfonic (150 mol %, 66  $\mu$ L), was carried out in 0.5 mL trifluoroacetic acid at 100 °C under air for 24 h as monitored by TLC. The resulting mixture was concentrated and purified by flash chromatography on silica gel to afford 185.8 mg (80%)(1.3:1) of **3f** as solid. (major): <sup>1</sup>H NMR (400 MHz, CDCl<sub>3</sub>)  $\delta$ : 7.93 (t,  $J$  = 1.6 Hz, 2H), 7.83 (d,  $J$  = 8.4 Hz, 2H), 7.54 (d,  $J$  = 7.6 Hz, 1H), 7.49 (t,  $J$  = 6.8 Hz, 2H), 7.30 (d,  $J$  = 8.4 Hz, 2H), 2.40 (s, 3H). <sup>13</sup>C NMR (100 MHz, CDCl<sub>3</sub>)  $\delta$ : 144.1, 141.9, 138.6, 133.0, 129.9, 129.2, 127.7, 127.4, 21.5. (minor): <sup>1</sup>H NMR (400 MHz, CDCl<sub>3</sub>)  $\delta$ : 8.22 (dd,  $J$  = 8.0, 1.6 Hz, 1H), 7.86 (t,  $J$  = 1.2 Hz, 2H), 7.57 (d,  $J$  = 7.2 Hz, 1H), 7.52-7.47 (m, 3H), 7.41 (d,  $J$  = 8.0 Hz, 1H), 7.23 (d,  $J$  = 7.6 Hz, 1H), 2.44 (s, 3H). <sup>13</sup>C NMR (100 MHz, CDCl<sub>3</sub>)  $\delta$ : 141.2, 138.7, 137.9, 133.6, 133.0, 132.6, 129.4, 129.0, 127.6, 126.4, 20.2. MS (70 eV):  $m/z$  (%): [M]<sup>+</sup>, 232 (100).

### 7) 1-Isopropyl-4-(phenylsulfonyl)benzene (**3g**)<sup>[4]</sup>

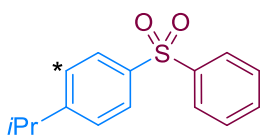

The reaction of cumene (2.5 mmol, 300.4 mg), *N*-fluorobenzenesulfonimide (**2a**) (0.5 mmol, 157.7 mg), trifluoromethanesulfonic (150 mol %, 66  $\mu$ L), was carried out in 0.5 mL trifluoroacetic acid at 100 °C under air for 24 h as monitored by TLC. The resulting mixture was concentrated and purified by flash chromatography on silica gel to afford 256.2 mg (97%) (4:1) of **3g** as solid. (major): <sup>1</sup>H NMR (400 MHz, CDCl<sub>3</sub>)  $\delta$ : 7.96-7.94 (m, 2H), 7.86 (dd,  $J$  = 6.4, 1.6 Hz, 2H), 7.54 (t,  $J$  = 0.8 Hz, 1H), 7.52-7.48 (m, 4H), 7.39 (s, 1H), 7.35 (d,  $J$  = 8.4 Hz, 2H), 2.94 (d,  $J$  = 6.8 Hz, 1H), 1.25 (d,  $J$  = 7.6 Hz, 3H), 1.23 (s, 3H). <sup>13</sup>C NMR (100 MHz, CDCl<sub>3</sub>)  $\delta$ : 154.8, 141.9, 138.8, 133.0, 129.2, 127.8, 127.6, 127.4, 34.2, 23.6. (minor): <sup>1</sup>H NMR (400 MHz, CDCl<sub>3</sub>)  $\delta$ : 8.21 (dd,  $J$  = 8.0, 1.6

Hz, 1H), 7.86 (dd,  $J = 6.8, 1.6$  Hz, 2H), 7.57-7.48 (m, 4H), 7.31 (d,  $J = 7.6$  Hz, 1H), 2.86 (dd,  $J = 15.2, 7.2$  Hz, 2H), 1.03 (t,  $J = 7.6$  Hz, 3H).  $^{13}\text{C}$  NMR (100 MHz,  $\text{CDCl}_3$ )  $\delta$ : 144.1, 141.9, 138.4, 133.7, 132.9, 130.9, 129.5, 129.0, 127.4, 126.2, 25.5, 15.0. MS (70 eV):  $m/z$  (%):  $[\text{M}]^+$ , 260 (80).

### 8) 1-(*tert*-Butyl)-4-(phenylsulfonyl)benzene (**3h**)<sup>[5]</sup>

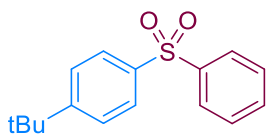

The reaction of *tert*-butylbenzene (2.5 mmol, 335.6 mg), *N*-fluorobenzenesulfonimide (**2a**) (0.5 mmol, 157.7 mg), trifluoromethanesulfonic (150 mol %, 66  $\mu\text{L}$ ), was carried out in 0.5 mL trifluoroacetic acid at 60 °C under air for 24 h as monitored by TLC. The resulting mixture was concentrated and purified by flash chromatography on silica gel to afford 251.4 mg (92%) of **3h** as solid.  $^1\text{H}$  NMR (400 MHz,  $\text{CDCl}_3$ )  $\delta$ : 7.96-7.94 (m, 2H), 7.86 (dd,  $J = 6.4, 1.6$  Hz, 2H), 7.54 (t,  $J = 0.8$  Hz, 1H), 7.52-7.48 (m, 4H), 1.31 (s, 9H).  $^{13}\text{C}$  NMR (100 MHz,  $\text{CDCl}_3$ )  $\delta$ : 154.8, 141.9, 138.8, 133.0, 129.2, 127.8, 127.6, 127.4, 34.2, 23.6. MS (70 eV):  $m/z$  (%):  $[\text{M}]^+$ , 274 (25).

### 9) 1-Cyclohexyl-4-(phenylsulfonyl)benzene (**3i**)

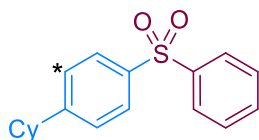

The reaction of cyclohexylbenzene (2.5 mmol, 400.7 mg), *N*-fluorobenzenesulfonimide (**2a**) (0.5 mmol, 157.7 mg), trifluoromethanesulfonic (150 mol %, 66  $\mu\text{L}$ ), was carried out in 0.5 mL trifluoroacetic acid at 80 °C under air for 24 h as monitored by TLC. The resulting mixture was concentrated and purified by flash chromatography on silica gel to afford 224.8 mg (75%) (4:1) of **3i** as solid. (major):  $^1\text{H}$  NMR (400 MHz,  $\text{CDCl}_3$ )  $\delta$ : 7.95 (d,  $J = 7.2$  Hz, 2H), 7.85 (d,  $J = 8.4$  Hz, 2H), 7.57-7.48 (m, 3H), 7.31 (t,  $J = 8.4$  Hz, 2H), 2.55 (d,  $J = 8.4$  Hz, 1H), 1.84-1.74 (d,  $J = 6.4$  Hz, 4H), 1.43-1.22 (m, 6H).  $^{13}\text{C}$  NMR (100 MHz, Chloroform- $d$ )  $\delta$ : 153.9, 141.9, 138.7, 133.0, 129.2, 127.8, 127.7, 127.5, 44.5, 34.0, 26.6, 26.0. (minor):  $^1\text{H}$  NMR (400 MHz,  $\text{CDCl}_3$ )  $\delta$ : 8.27 (dd,  $J = 8.4, 1.6$  Hz, 1H), 7.86 (dd,  $J = 7.2, 1.6$  Hz, 2H), 7.56 (t,  $J = 4.4$  Hz, 2H), 7.51 (t,  $J = 1.6$  Hz, 2H), 7.40-7.36 (m, 2H), 1.67 (d,  $J = 6.8$  Hz, 4H), 1.23 (t,  $J = 6.4$  Hz, 6H).  $^{13}\text{C}$  NMR (100 MHz,  $\text{CDCl}_3$ )  $\delta$ : 147.8, 142.5, 138.0, 133.8, 132.8, 129.0, 128.9, 128.8, 127.4, 126.0, 39.5, 33.7, 26.7, 25.9. HRMS

(EI),  $m/z$  calcd. for  $C_{18}H_{20}O_2S$   $[M]^+$ : 300.1184, found: 300.1177.

### 10) 1-Methoxy-4-(phenylsulfonyl)benzene (**3j**)<sup>[1]</sup>

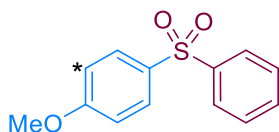

The reaction of anisole (2.5 mmol, 270.4 mg), *N*-fluorobenzenesulfonimide (**2a**) (0.5 mmol, 157.7 mg), trifluoromethanesulfonic (150 mol %, 66  $\mu$ L), was carried out in 0.5 mL trifluoroacetic acid at 100 °C under air for 24 h as monitored by TLC. The resulting mixture was concentrated and purified by flash chromatography on silica gel to afford 224.0 mg (90%) (1.5:1) of **3j** as solid. (major):  $^1H$  NMR (400 MHz,  $CDCl_3$ )  $\delta$ : 7.92 (t,  $J$  = 6.8 Hz, 2H), 7.88 (dd,  $J$  = 7.2, 2.0 Hz, 2H), 7.54 (d,  $J$  = 7.2 Hz, 1H), 7.50 (t,  $J$  = 1.6 Hz, 2H), 6.97 (dd,  $J$  = 7.2, 2.4 Hz, 2H), 3.85 (s, 3H).  $^{13}C$  NMR (100 MHz, Chloroform-*d*)  $\delta$ : 163.3, 142.3, 133.0, 132.8, 129.9, 129.2, 127.3, 114.5, 55.6. (minor):  $^1H$  NMR (400 MHz,  $CDCl_3$ )  $\delta$ : 8.17 (dd,  $J$  = 7.6, 1.6 Hz, 1H), 7.97 (t,  $J$  = 1.2 Hz, 2H), 7.56 (dd,  $J$  = 7.6, 2.0 Hz, 2H), 7.49 (t,  $J$  = 7.2 Hz, 2H), 7.12 (d,  $J$  = 7.6 Hz, 1H), 6.91 (d,  $J$  = 8.4 Hz, 1H), 3.76 (s, 3H).  $^{13}C$  NMR (100 MHz, Chloroform-*d*)  $\delta$ : 157.0, 141.1, 135.5, 132.9, 129.8, 128.9, 128.4, 128.3, 120.5, 112.4, 55.8. MS(70 eV):  $m/z$  (%):  $[M]^+$ , 248 (60).

### 11) 4-(Phenylsulfonyl)phenol (**3k**)<sup>[3]</sup>

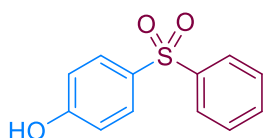

The reaction of phenol (0.8 mmol, 75.3 mg), *N*-fluorobenzenesulfonimide (**2a**) (0.4 mmol, 126.4 mg), trifluoromethanesulfonic (500 mol %, 177  $\mu$ L), was carried out in 1.0 mL trifluoroacetic acid at 100 °C under air for 12 h as monitored by TLC. The resulting mixture was concentrated and purified by flash chromatography on silica gel to afford 29.2 mg (16%) of **3k** as solid.  $^1H$  NMR (400 MHz,  $CDCl_3$ )  $\delta$ : 7.94-7.90 (m, 2H), 7.86-7.82 (m, 2H), 7.57-7.47 (m, 3H), 6.93-6.89 (m, 2H), 5.62 (s, 1H).  $^{13}C$  NMR (100 MHz,  $CDCl_3$ )  $\delta$ : 160.6, 141.8, 133.7, 132.07, 130.0, 129.3, 127.1, 116.2. HRMS:  $m/z$   $[M+Na]^+$ : calcd for  $C_{12}H_{10}NaO_3S$ : 257.0243; found: 257.0241.

### 12) 1,4-Dimethyl-2-(phenylsulfonyl)benzene (**3m**)<sup>[1]</sup>



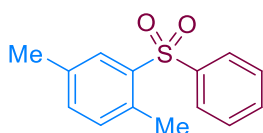

The reaction of *p*-xylene (2.5 mmol, 268.1 mg), *N*-fluorobenzenesulfonimide (**2a**) (0.5 mmol, 157.7 mg), trifluoromethanesulfonic (150 mol %, 66  $\mu$ L), was carried out in 0.5 mL trifluoroacetic acid at 60 °C under air for 24 h as monitored by TLC. The resulting mixture was concentrated and purified by flash chromatography on silica gel to afford 152.3 mg (62%) of **3m** as solid.  $^1\text{H}$  NMR (400 MHz,  $\text{CDCl}_3$ )  $\delta$ : 8.05 (d,  $J = 0.8$  Hz, 1H), 7.86 (t,  $J = 1.6$  Hz, 2H), 7.56 (d,  $J = 7.2$  Hz, 1H), 7.50 (dd,  $J = 8.0, 6.8$  Hz, 2H), 7.28 (d,  $J = 0.8$  Hz, 1H), 7.11 (d,  $J = 8.0$  Hz, 1H).  $^{13}\text{C}$  NMR (100 MHz,  $\text{CDCl}_3$ )  $\delta$ : 141.2, 138.2, 136.3, 134.6, 134.3, 132.8, 132.5, 129.6, 128.9, 127.4, 20.8, 19.6. MS (70 eV):  $m/z$  (%):  $[\text{M}]^+$ , 246 (90).

### 13) 1-Chloro-4-methyl-2-(phenylsulfonyl)benzene (**3n**)

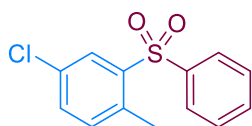

The reaction of 1-chloro-4-methylbenzene (2.5 mmol, 316.5 mg), *N*-fluorobenzenesulfonimide (**2a**) (0.5 mmol, 157.7 mg), trifluoromethanesulfonic (150 mol %, 66  $\mu$ L), was carried out in 0.5 mL trifluoroacetic acid at 100 °C under air for 24 h as monitored by TLC. The resulting mixture was concentrated and purified by flash chromatography on silica gel to afford 170.0 mg (64%) of **3n** as solid.  $^1\text{H}$  NMR (400 MHz,  $\text{CDCl}_3$ )  $\delta$ : 8.22 (d,  $J = 2.0$  Hz, 1H), 7.88 (t,  $J = 1.6$  Hz, 2H), 7.60 (d,  $J = 7.2$  Hz, 1H), 7.53 (dd,  $J = 8.0, 6.8$  Hz, 2H), 7.45 (dd,  $J = 8.0, 2.4$  Hz, 1H), 7.17 (d,  $J = 8.0$  Hz, 1H), 2.40 (s, 3H).  $^{13}\text{C}$  NMR (100 MHz,  $\text{CDCl}_3$ )  $\delta$ : 140.5, 140.3, 136.3, 134.0, 133.5, 133.4, 132.5, 129.2, 129.1, 127.8, 19.6. HRMS (EI),  $m/z$  calcd. for  $\text{C}_{13}\text{H}_{11}\text{ClO}_2\text{S}$   $[\text{M}]^+$ : 266.0168, found: 266.0174.

### 14) 2,4-Dimethyl-1-(phenylsulfonyl)benzene (**3o**)<sup>[6]</sup>

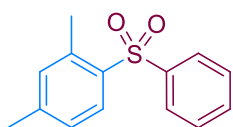

The reaction of *m*-xylene (2.5 mmol, 265.0 mg), *N*-fluorobenzenesulfonimide (**2a**) (0.5 mmol, 157.7 mg), trifluoromethanesulfonic (150 mol %, 66  $\mu$ L), was carried out in 0.5 mL trifluoroacetic

acid at 60 °C under air for 24 h as monitored by TLC. The resulting mixture was concentrated and purified by flash chromatography on silica gel to afford 208.0 mg (84%) of **3o** as solid. <sup>1</sup>H NMR (400 MHz, CDCl<sub>3</sub>) δ: 8.11 (d, *J* = 0.8 Hz, 1H), 7.84 (t, *J* = 1.6 Hz, 2H), 7.60 (d, *J* = 7.6 Hz, 1H), 7.51-7.47 (m, 2H), 7.20 (d, *J* = 8.0 Hz, 1H), 7.04 (s, 1H), 2.39 (s, 3H), 2.37 (s, 3H). <sup>13</sup>C NMR (100 MHz, CDCl<sub>3</sub>) δ: 144.4, 141.5, 137.7, 135.8, 133.3, 132.8, 129.6, 128.9, 127.5, 127.0, 21.3, 20.1. MS (70 eV): *m/z* (%): [M]<sup>+</sup>, 246 (60).

### 15) 2,4-Dichloro-1-(phenylsulfonyl)benzene (**3p**)

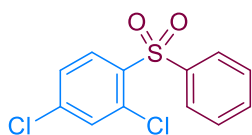

The reaction of 1,3-dichlorobenzene (2.5 mmol, 371.2 mg), *N*-fluorobenzenesulfonimide (**2a**) (0.5 mmol, 157.7 mg), trifluoromethanesulfonic (150 mol %, 66 μL), was carried out in 0.5 mL trifluoroacetic acid at 100 °C under air for 24 h as monitored by TLC. The resulting mixture was concentrated and purified by flash chromatography on silica gel to afford 169.6 mg (59%) of **3p** as solid. <sup>1</sup>H NMR (400 MHz, CDCl<sub>3</sub>) δ: 8.31 (d, *J* = 8.8 Hz, 1H), 7.94 (dd, *J* = 7.2, 5.6 Hz, 2H), 7.62 (d, *J* = 7.6 Hz, 1H), 7.53 (t, *J* = 7.2 Hz, 2H), 7.49-7.45 (m, 2H). <sup>13</sup>C NMR (100 MHz, CDCl<sub>3</sub>) δ: 140.6, 139.6, 137.0, 133.9, 133.7, 132.0, 131.8, 129.0, 128.5, 127.6. HRMS (EI), *m/z* calcd. for C<sub>12</sub>H<sub>8</sub>Cl<sub>2</sub>O<sub>2</sub>S [M]<sup>+</sup> : 285.9622, found: 285.9625.

### 16) 2-Chloro-1-methyl-4-(phenylsulfonyl)benzene (**3q**)<sup>[7]</sup>

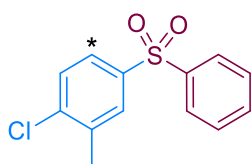

The reaction of 1-chloro-2-methylbenzene (2.5 mmol, 316.5 mg), *N*-fluorobenzenesulfonimide (**2a**) (0.5 mmol, 157.7 mg), trifluoromethanesulfonic (150 mol %, 66 μL), was carried out in 0.5 mL trifluoroacetic acid at 100 °C under air for 24 h as monitored by TLC. The resulting mixture was concentrated and purified by flash chromatography on silica gel to afford 225.6 mg (85%) (3.5:1) of **3q** as solid. (major): <sup>1</sup>H NMR (400 MHz, CDCl<sub>3</sub>) δ: 7.96 (m, , 2H), 7.81 (d, *J* = 2.0 Hz, 1H), 7.71 (dd, *J* = 8.4, 2.0 Hz, 1H), 7.58 (d, *J* = 6.0 Hz, 1H), 7.56-7.49 (m, 2H), 7.45 (d, *J* = 8.4 Hz, 1H), 2.40

(d,  $J = 2.4$  Hz, 3H).  $^{13}\text{C}$  NMR (100 MHz,  $\text{CDCl}_3$ )  $\delta$ : 141.2, 139.9, 139.7, 137.7, 133.3, 129.9, 129.7, 129.3, 127.6, 126.3, 20.1. (minor):  $^1\text{H}$  NMR (400 MHz,  $\text{CDCl}_3$ )  $\delta$ : 7.95 – 7.91 (m, 3H), 7.72 (dd,  $J = 8.0, 2.4$  Hz, 1H), 7.59–7.57 (m, 1H), 7.54–7.50 (m, 2H), 7.36 (d,  $J = 8.0$  Hz, 1H), 2.41 (s, 3H).  $^{13}\text{C}$  NMR (100 MHz,  $\text{CDCl}_3$ )  $\delta$ : 142.2, 141.2, 140.5, 135.4, 133.4, 131.7, 129.4, 128.2, 127.6, 125.7, 20.4. HRMS (EI),  $m/z$  calcd. for  $\text{C}_{13}\text{H}_{11}\text{ClO}_2\text{S}$   $[\text{M}]^+$ : 266.0168, found: 266.0173.

### 17) 1,3,5-Trimethyl-2-(phenylsulfonyl)benzene (3r) <sup>[1]</sup>

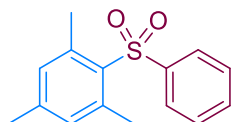

The reaction of mesitylene (2.5 mmol, 300.5 mg), *N*-fluorobenzenesulfonimide (**2a**) (0.5 mmol, 157.7 mg), trifluoromethanesulfonic (150 mol %, 66  $\mu\text{L}$ ), was carried out in 0.5 mL trifluoroacetic acid at 80 °C under air for 24 h as monitored by TLC. The resulting mixture was concentrated and purified by flash chromatography on silica gel to afford 183.2 mg (70%) of **3s** as solid.  $^1\text{H}$  NMR (400 MHz,  $\text{CDCl}_3$ )  $\delta$ : 7.78 (t,  $J = 1.2$ , Hz, 2H), 7.54 (s, 1H), 7.47 (t,  $J = 1.6$ , Hz, 2H), 6.94 (s, 2H), 2.59 (s, 6H), 2.30 (s, 3H) ppm.  $^{13}\text{C}$  NMR (100 MHz,  $\text{CDCl}_3$ )  $\delta$ : 143.4, 143.4, 140.0, 133.7, 132.5, 132.2, 128.8, 126.2, 22.8, 21.0 ppm. MS (70 eV):  $m/z$  (%):  $[\text{M}]^+$ , 260 (40).

### 18) 1-Chloro-4-tosylbenzene (4a) <sup>[8]</sup>

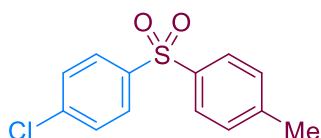

The reaction of chlorobenzene (2.5 mmol, 281.0 mg), *N*-fluoro-4-methyl-*N*-tosylbenzenesulfonamide (**2b**) (0.5 mmol, 171.7 mg), trifluoromethanesulfonic (150 mol %, 66  $\mu\text{L}$ ), was carried out in 0.5 mL trifluoroacetic acid at 60 °C under air for 24 h as monitored by TLC. The resulting mixture was concentrated and purified by flash chromatography on silica gel to afford 204.3 mg (76%) of **4a** as solid.  $^1\text{H}$  NMR (400 MHz,  $\text{CDCl}_3$ )  $\delta$ : 7.86 (dd,  $J = 19.2, 6.8$  Hz, 4H), 7.46 (d,  $J = 6.8$  Hz, 2H), 7.31 (d,  $J = 8.0$  Hz, 2H), 2.41 (s, 3H) ppm.  $^{13}\text{C}$  NMR (100 MHz,  $\text{CDCl}_3$ )  $\delta$ : 144.1, 141.9, 133.0, 129.9, 129.2, 127.7, 127.5, 21.6. MS (70 eV):  $m/z$  (%):  $[\text{M}]^+$ , 266 (60).

### 19) 1-Fluoro-4-tosylbenzene (4b) <sup>[2]</sup>

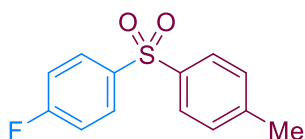

The reaction of fluorobenzene (2.5 mmol, 242.7 mg), *N*-fluoro-4-methyl-*N*-tosylbenzenesulfonamide (**4b**) (0.5 mmol, 171.7 mg), trifluoromethanesulfonic (150 mol %, 66  $\mu$ L), was carried out in 0.5 mL trifluoroacetic acid at 60 °C under air for 24 h as monitored by TLC. The resulting mixture was concentrated and purified by flash chromatography on silica gel to afford 204.7 mg (82%) of **4b** as solid.  $^1\text{H}$  NMR (400 MHz,  $\text{CDCl}_3$ )  $\delta$ : 7.94 (dd,  $J$  = 8.8, 5.6 Hz, 2H), 7.81 (d,  $J$  = 8.4 Hz, 2H), 7.29 (d,  $J$  = 8.0 Hz, 2H), 7.16 (dd,  $J$  = 8.8, 7.6 Hz, 2H), 2.40 (s, 3H).  $^{13}\text{C}$  NMR (100 MHz,  $\text{CDCl}_3$ )  $\delta$ : 165.3 (d,  $^1J_{\text{C-F}}$  = 253.6 Hz), 144.3, 138.4, 138.0 (d,  $^4J_{\text{C-F}}$  = 2.5 Hz), 130.3 (d,  $^3J_{\text{C-F}}$  = 9.4 Hz), 130.0, 127.6, 116.5 (d,  $^2J_{\text{C-F}}$  = 21.9 Hz), 21.6.  $^{19}\text{F}$  NMR (376 MHz,  $\text{CDCl}_3$ ):  $\delta$  -104.2 ppm. MS (70 eV):  $m/z$  (%):  $[\text{M}]^+$ , 250 (100).

## 20) 4,4'-Sulfonylbis(methylbenzene) (**4c**)<sup>[8]</sup>

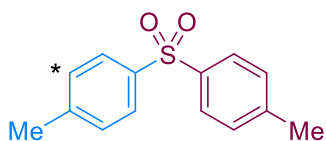

The reaction of toluene (2.5 mmol, 230.4 mg), *N*-fluoro-4-methyl-*N*-tosylbenzenesulfonamide (**2b**) (0.5 mmol, 171.7 mg), trifluoromethanesulfonic (150 mol %, 66  $\mu$ L), was carried out in 0.5 mL trifluoroacetic acid at 60 °C under air for 24 h as monitored by TLC. The resulting mixture was concentrated and purified by flash chromatography on silica gel to afford 201.7 mg (82%) (3:1) of **4c** as solid. (major):  $^1\text{H}$ NMR (400 MHz,  $\text{CDCl}_3$ )  $\delta$ : 7.81 (d,  $J$  = 7.6 Hz, 4H), 7.26 (d,  $J$  = 8.0 Hz, 4H), 2.35 (s, 6H).  $^{13}\text{C}$  NMR (100 MHz,  $\text{CDCl}_3$ )  $\delta$ : 143.8, 138.8, 129.7, 127.3, 21.3. (minor):  $^1\text{H}$  NMR (400 MHz,  $\text{CDCl}_3$ )  $\delta$ : 8.19 (dd,  $J$  = 7.6, 1.2 Hz, 1H), 7.75 (d,  $J$  = 8.0 Hz, 2H), 7.47 (td,  $J$  = 7.5, 1.6 Hz, 1H), 7.42 - 7.33 (m, 1H), 7.32 - 7.27 (m, 2H), 7.22 (dd,  $J$  = 7.4, 1.4 Hz, 1H), 2.44 (s, 3H), 2.41 (s, 3H).  $^{13}\text{C}$  NMR (100 MHz,  $\text{CDCl}_3$ )  $\delta$ : 143.9, 139.0, 138.1, 133.4, 132.5, 129.6, 129.2, 127.7, 126.4, 21.5, 20.1. HRMS:  $m/z$   $[\text{M}+\text{Na}]^+$ : calcd for  $\text{C}_{14}\text{H}_{14}\text{NaO}_2\text{S}$ : 269.0607; found: 269.0605.

## 21) 1-Methyl-4-(phenylsulfonyl)benzene (**3f**)<sup>[2]</sup>

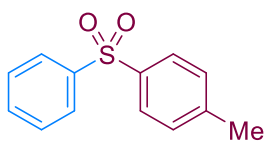

The reaction of benzene (2.5 mmol, 195.3 mg), *N*-fluoro-4-methyl-*N*-tosylbenzenesulfonamide (**2b**) (0.5 mmol, 171.7 mg), trifluoromethanesulfonic (150 mol %, 66  $\mu$ L), was carried out in 0.5 mL

trifluoroacetic acid at 60 °C under air for 24 h as monitored by TLC. The resulting mixture was concentrated and purified by flash chromatography on silica gel to afford 80.1 mg (34%) of **3f** as solid. <sup>1</sup>H NMR (400 MHz, CDCl<sub>3</sub>) δ: 7.93 (t, *J* = 1.6 Hz, 2H), 7.83 (d, *J* = 8.4 Hz, 2H), 7.54 (d, *J* = 7.6 Hz, 2H), 7.49 (t, *J* = 6.8 Hz, 2H), 7.30 (d, *J* = 8.4 Hz, 2H), 2.40 (s, 3H). <sup>13</sup>C NMR (100 MHz, CDCl<sub>3</sub>) δ: 144.1, 141.9, 138.6, 133.0, 129.9, 129.2, 127.7, 127.4, 21.5. MS (70 eV): *m/z* (%): [M]<sup>+</sup>, 232 (100).

## 22) 1-Methyl-4-(phenylsulfonyl)benzene (**3f**)<sup>[2]</sup>

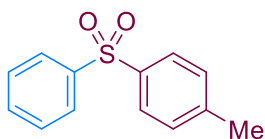

The reaction of benzene (2.5 mmol, 195.3 mg), *N*-fluoro-4-methyl-*N*-(phenylsulfonyl)benzenesulfonamide (**2c**) (0.5 mmol, 164.7 mg), trifluoromethanesulfonic (150 mol %, 66 μL), was carried out in 0.5 mL trifluoroacetic acid at 100 °C under air for 24 h as monitored by TLC. The resulting mixture was concentrated and purified by flash chromatography on silica gel to afford 70.1 mg (60%) of **3f** as solid. <sup>1</sup>H NMR (400 MHz, CDCl<sub>3</sub>) δ: 7.93 (t, *J* = 1.6 Hz, 2H), 7.83 (d, *J* = 8.4 Hz, 2H), 7.54 (d, *J* = 7.6 Hz, 2H), 7.49 (t, *J* = 6.8 Hz, 2H), 7.30 (d, *J* = 8.4 Hz, 2H), 2.40 (s, 3H). <sup>13</sup>C NMR (100 MHz, CDCl<sub>3</sub>) δ: 144.1, 141.9, 138.6, 133.0, 129.9, 129.2, 127.7, 127.4, 21.5. MS (70 eV): *m/z* (%): [M]<sup>+</sup>, 232 (100).

## 23) Sulfonyldibenzene (**3e**)<sup>[2]</sup>

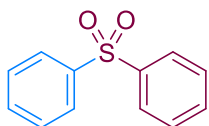

The reaction of benzene (2.5 mmol, 195.3 mg), *N*-fluoro-4-nitro-*N*-(phenylsulfonyl)benzenesulfonamide (**2d**) (0.5 mmol, 180.2 mg), trifluoromethanesulfonic (150 mol %, 66 μL), was carried out in 0.5 mL trifluoroacetic acid at 60 °C under air for 24 h as monitored by TLC. The resulting mixture was concentrated and purified by flash chromatography on silica gel to afford 40.1 mg (35%) of **3e** as solid. <sup>1</sup>H NMR (400 MHz, CDCl<sub>3</sub>) δ: 7.95 (dd, *J* = 8.0, 1.2 Hz, 4H), 7.56 (dd, *J* = 4.0, 1.2 Hz, 2H), 7.51 (dd, *J* = 8.0, 7.2 Hz, 4H). <sup>13</sup>C NMR (100 MHz, CDCl<sub>3</sub>) δ: 141.4, 133.1, 129.2, 127.6. MS (70 eV): *m/z* (%): [M]<sup>+</sup>, 218 (25).

## Structural modification of $\beta$ -estradiol derivative **5**

### (8*R*,9*S*,13*S*,14*S*)-3,17-Dimethoxy-13-methyl-2-(phenylsulfonyl)-7,8,9,11,12,13,14,15,16,17-decahydro-6H-cyclopenta[*a*]phenanthrene (**5**)

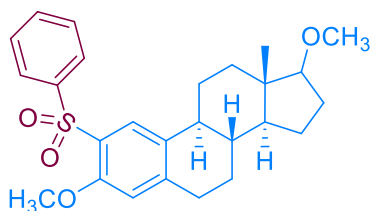

The reaction of (8*R*,9*S*,13*S*,14*S*)-3,17-dimethoxy-13-methyl-7,8,9,11,12,13,14,15,16,17-decahydro-6H-cyclopenta[*a*]phenanthrene (0.25 mmol, 75.0 mg), *N*-fluoro-*N*-(phenylsulfonyl)benzenesulfonamide (**2a**) (0.0625 mmol, 19.8 mg), trifluoromethanesulfonic (600 mol %, 33  $\mu$ L), was carried out in 0.5 mL trifluoroacetic acid at 30 °C under air for 24 h as monitored by TLC. The resulting mixture was concentrated and purified by flash chromatography on silica gel to afford 30.2 mg (55%) of **5** as solid.  $^1\text{H}$  NMR (400 MHz,  $\text{CDCl}_3$ )  $\delta$ : 8.04 (s, 1H), 7.97-7.95 (m, 2H), 7.56-7.52 (m, 1H), 7.46 (dd,  $J = 14.8, 7.6$  Hz, 2H), 6.58 (s, 1H), 3.69 (s, 3H), 3.47 (s, 3H), 3.32 (dd,  $J = 16.8, 8.4$  Hz, 1H), 2.85 (dd,  $J = 8.8, 4.2$  Hz, 2H), 2.42 (dt,  $J = 12.9, 3.5$  Hz, 1H), 2.27- 2.14 (m, 1H), 2.08 (ddd,  $J = 13.8, 9.5, 3.5$  Hz, 2H), 1.88 (ddt,  $J = 12.3, 4.4, 2.5$  Hz, 1H), 1.75-1.22 (m, 8H).  $^{13}\text{C}$  NMR (100 MHz,  $\text{CDCl}_3$ )  $\delta$ : 154.7, 145.4, 141.9, 133.1, 132.6, 128.4, 128.2, 126.9, 126.1, 112.7, 90.6, 76.7, 57.9, 55.8, 50.2, 43.7, 43.2, 38.3, 37.8, 30.1, 27.7, 26.7, 26.4, 23.0, 11.5. HRMS (EI),  $m/z$  calcd. for  $\text{C}_{26}\text{H}_{32}\text{O}_4\text{S}$   $[\text{M}]^+$ : 440.2021, found: 440.2028.

## Synthesis of the intermediate **6** of an inhibitor of Farnesyl-protein transferase

### 4-Bromo-2-methyl-1-(phenylsulfonyl)benzene (**6**)<sup>[9]</sup>

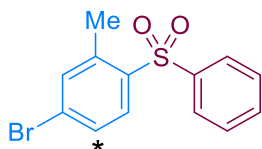

The reaction of 1-bromo-3-methylbenzene (1.25 mmol, 427.6 mg), *N*-fluoro-*N*-(phenylsulfonyl)benzenesulfonamide (**2a**) (0.5 mmol, 158.0 mg), trifluoromethanesulfonic (0.75 mmol, 66  $\mu$ L), was carried out in 0.5 mL trifluoroacetic acid at 60 °C under air for 24 h as monitored by TLC. The resulting mixture was concentrated and purified by flash chromatography on silica gel to afford 196.0 mg (63%) of **6** as solid. (major):  $^1\text{H}$  NMR (400

MHz, CDCl<sub>3</sub>)  $\delta$ : 8.08 (d,  $J$  = 8.4 Hz, 1H), 7.85 (m, 2H), 7.59 (d,  $J$  = 3.6 Hz, 1H), 7.54-7.50 (m, 3H), 7.40 (d,  $J$  = 1.2 Hz, 1H), 2.41 (s, 3H) ppm. <sup>13</sup>C NMR (100 MHz, CDCl<sub>3</sub>)  $\delta$ : 140.8, 139.9, 138.0, 135.4, 133.2, 130.9, 129.7, 129.1, 128.5, 127.6, 20.0 ppm. The resulting mixture was concentrated and purified by flash chromatography on silica gel to afford 56.1 mg (18%) of **6** (minor) as solid. (minor): <sup>1</sup>H NMR (400 MHz, CDCl<sub>3</sub>)  $\delta$ : 8.29 (d,  $J$  = 8.0 Hz, 1H), 7.94 (d,  $J$  = 7.6 Hz, 2H), 7.58 (d,  $J$  = 3.6 Hz, 1H), 7.52-7.48 (m, 3H), 7.33 (d,  $J$  = 8.0 Hz, 1H), 2.39 (s, 3H). <sup>13</sup>C NMR (100 MHz, CDCl<sub>3</sub>)  $\delta$ : 146.0, 140.2, 136.9, 136.0, 133.2, 131.3, 128.7, 128.5, 128.4, 120.9, 21.0. HRMS:  $m/z$  [M+Na]<sup>+</sup>: calcd for C<sub>13</sub>H<sub>11</sub>BrNaO<sub>2</sub>S : 332.9555; found: 332.9553.

## Gram-scale synthesis of EPAC2 antagonist **8**

### 1,3,5-Trimethyl-2-tosylbenzene (**8**)<sup>[6]</sup>

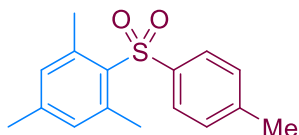

The reaction of mesitylene (23.1 mmol, 2.78 g), *N*-fluoro-4-methyl-*N*-tosylbenzenesulfonamide (**2b**) (4.62 mmol, 1.59 g), trifluoromethanesulfonic (150 mol %, 66  $\mu$ L), was carried out in 0.5 mL CH<sub>3</sub>CN at 130 °C under air for 36 h as monitored by TLC. The resulting mixture was concentrated and purified by flash chromatography on silica gel to afford 2.38 g (94%) of **8** as solid. <sup>1</sup>H NMR (400 MHz, CDCl<sub>3</sub>)  $\delta$ : 7.67 (d,  $J$  = 8.4 Hz, 2H), 7.26 (t,  $J$  = 5.6 Hz, 2H), 6.93 (s, 2H), 2.59 (s, 6H), 2.40 (s, 3H), 2.29 (s, 3H) ppm. <sup>13</sup>C NMR (100 MHz, CDCl<sub>3</sub>)  $\delta$ : 143.3, 143.1, 140.5, 139.9, 134.1, 132.1, 129.4, 126.2, 22.8, 21.5, 21.0 ppm. HRMS:  $m/z$  [M+Na]<sup>+</sup>: calcd for C<sub>16</sub>H<sub>18</sub>NaO<sub>2</sub>S : 297.0920; found: 297.0917.

## Scheme S1 Control Experiments

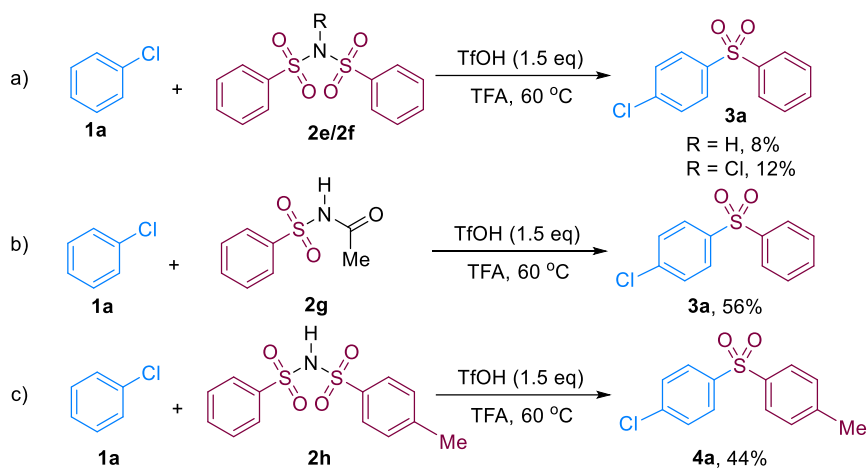

### Typical procedure:

The reaction of chlorobenzene **1a** (2.5 mmol, 281.0 mg), **2** (0.5 mmol), trifluoromethanesulfonic (150 mol %, 66  $\mu$ L), was carried out in 0.5 mL trifluoroacetic acid at 60 °C under air for 24 h as monitored by TLC. The resulting mixture was concentrated and purified by flash chromatography on silica gel to afford the product.



## References

- [1] N. Margraf, G. Manolikakes. *J. Org. Chem.* **2015**, *80*, 2582.
- [2] Y. Fu, W. Zhu, X. Zhao, *et al.* *Org. Biomol. Chem.* **2014**, *12*, 4295.
- [3] Y. Chen, M. C. Willis. *Chem. Sci.* **2017**, *8*, 3249.
- [4] B. B. F. Mirjalili, M. A. Zolfigol, A. Bamoniri, *et al.* *B. Korean. Chem. Soc.* **2003**, *24*, 1009.
- [5] J. Zhao, S. Niu, X. Jiang, *et al.* *J. Org. Chem.* **2018**, *83*, 6589.
- [6] K. Bahrami, M. M. Khodei, F. Shahbazi. *Tetrahedron Lett.* **2008**, *49*, 3931.
- [7] V. Gurumani and M. Swaminathan, *Indian. J. Chem.*, **1993**, *32B*, 281.
- [8] X. Wu, Y. Wang. *Synlett*, **2014**, *25*, 1163.
- [9] H. Zhu, Y. Shen, D. Wen, Z.-G. Le, T. Tu. *Org. Lett.* **2019**, *21*, 974.

**$^1\text{H}$  NMR,  $^{13}\text{C}$  NMR and  $^{19}\text{F}$  NMR spectra for products**

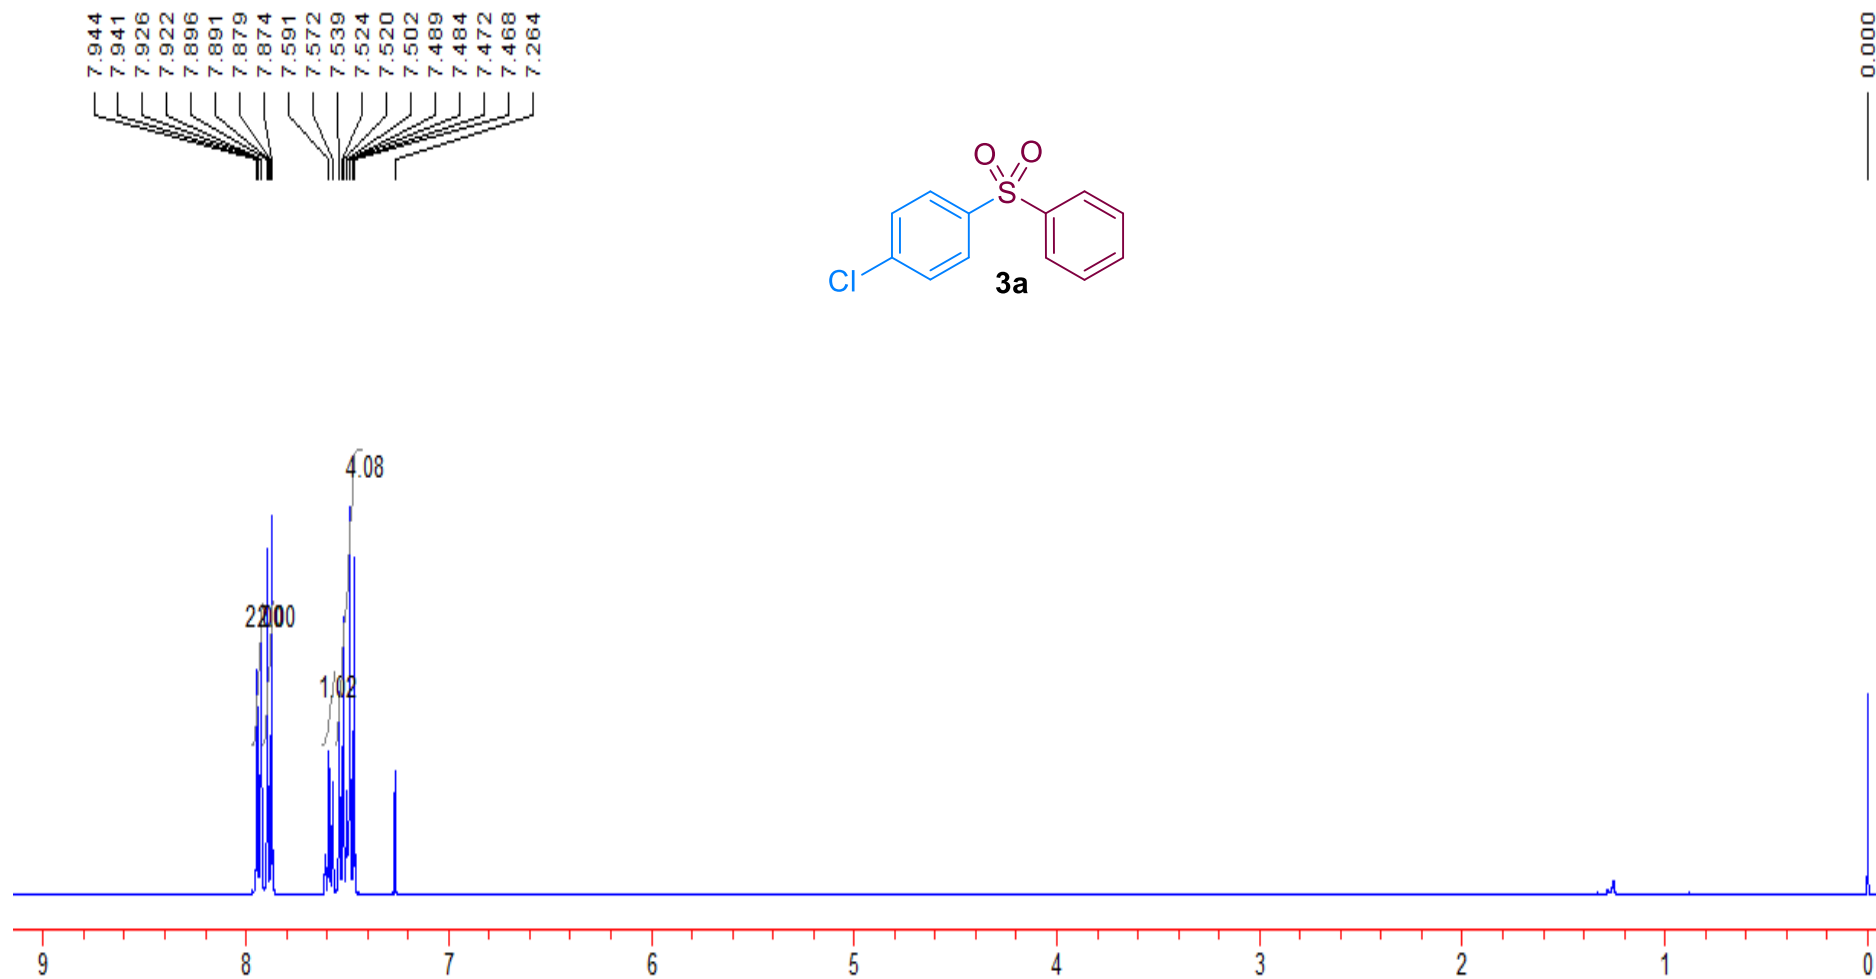

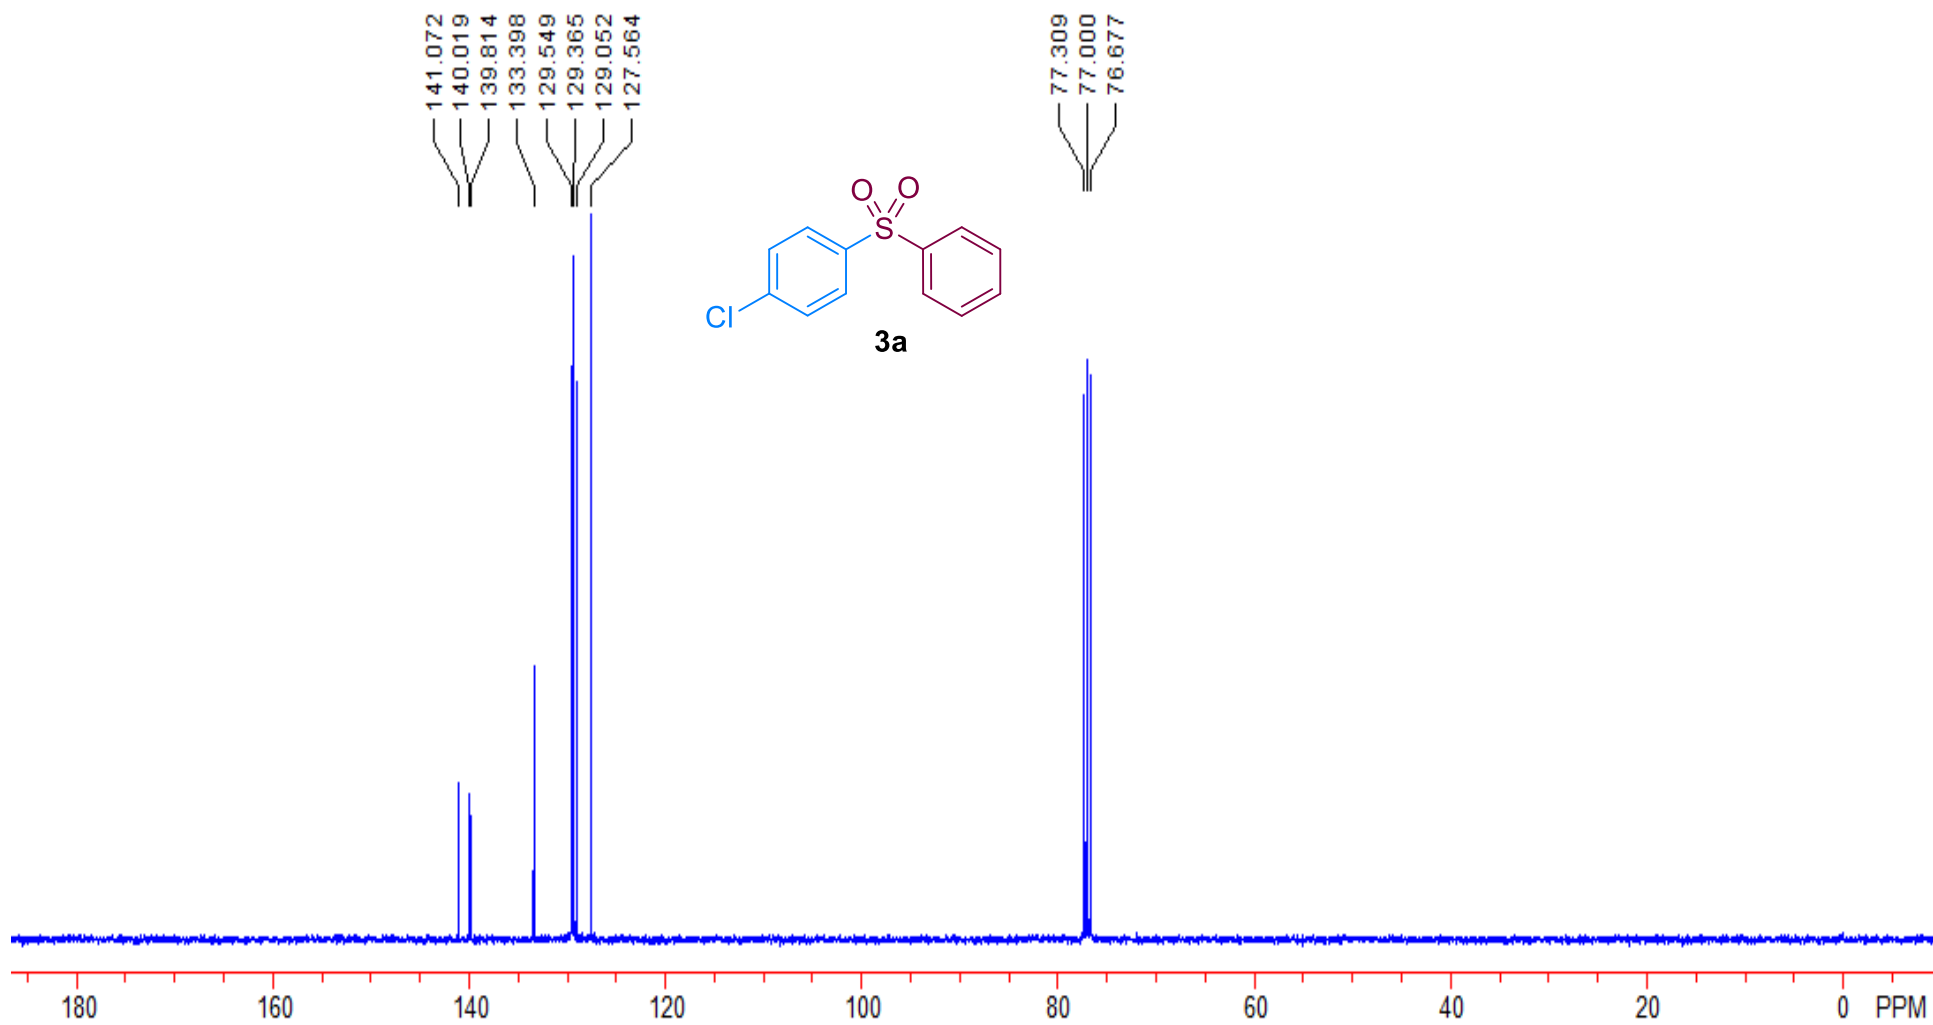

7.987  
7.981  
7.974  
7.969  
7.964  
7.956  
7.950  
7.947  
7.934  
7.929  
7.925  
7.585  
7.570  
7.567  
7.563  
7.537  
7.522  
7.518  
7.500  
7.266  
7.204  
7.183  
7.161

0.000

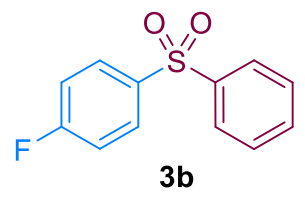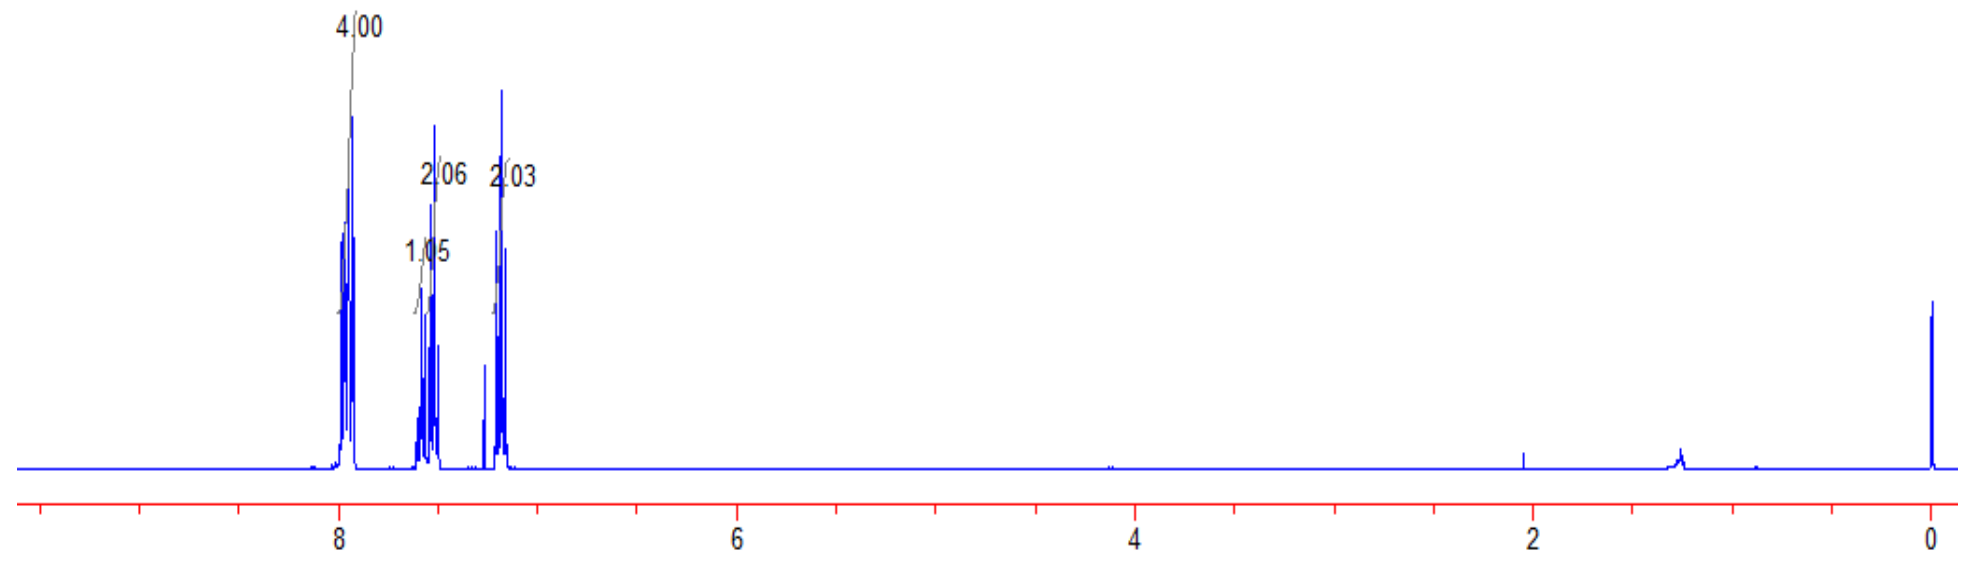

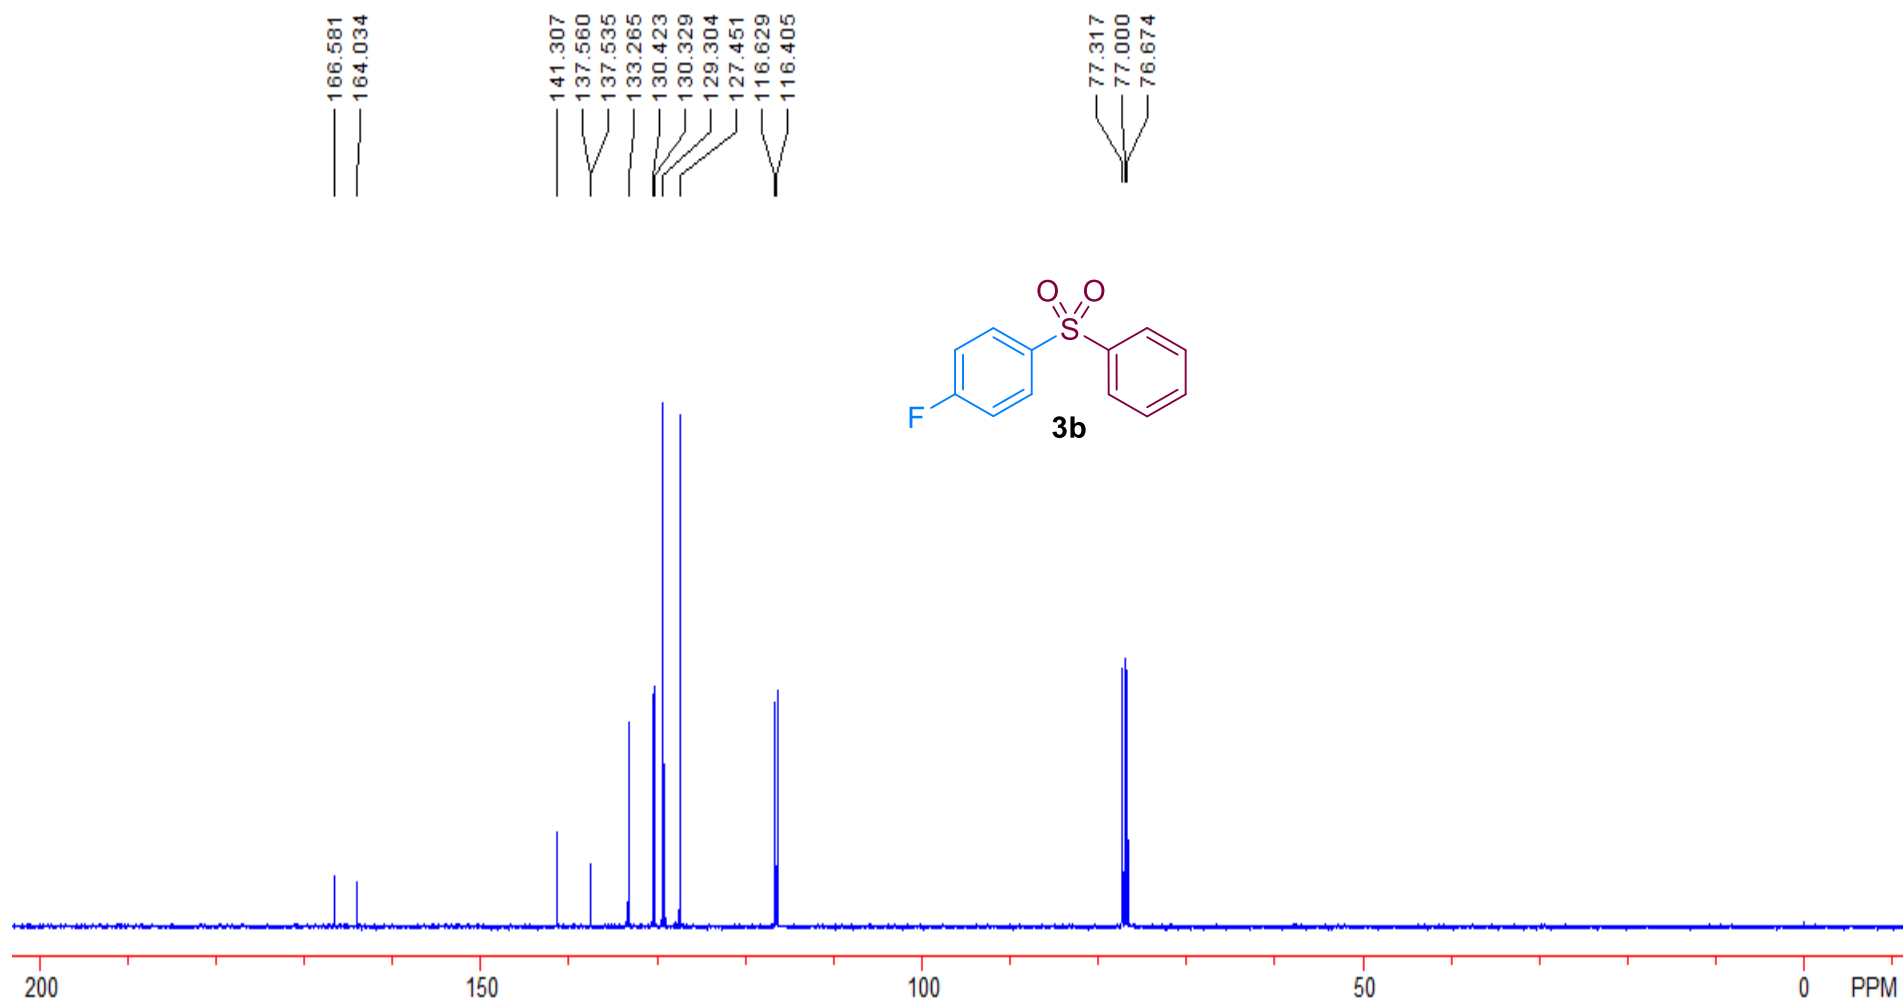

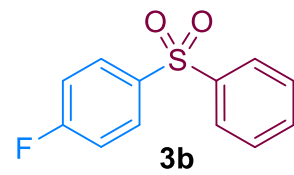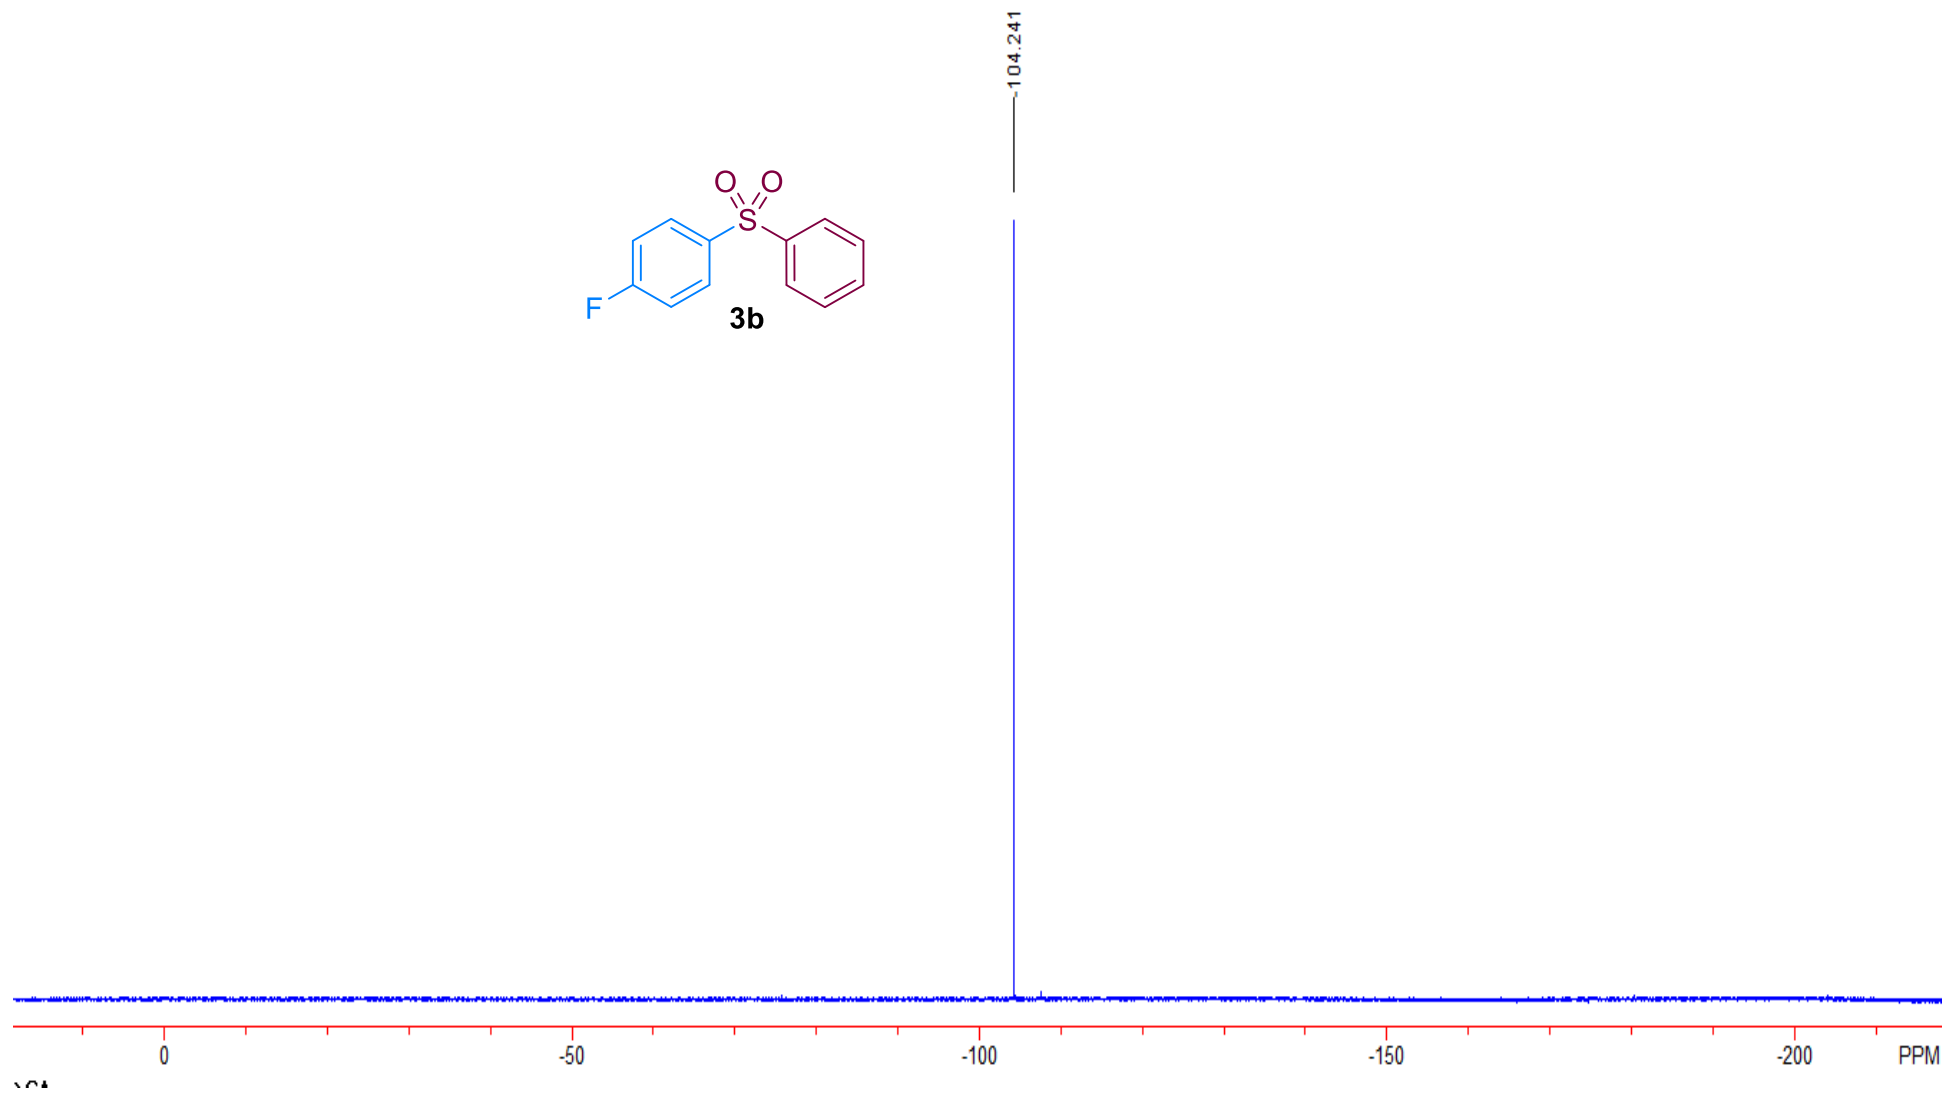

7.943  
7.924  
7.921  
7.820  
7.815  
7.803  
7.798  
7.657  
7.652  
7.640  
7.635  
7.593  
7.575  
7.540  
7.524  
7.521  
7.503  
7.265

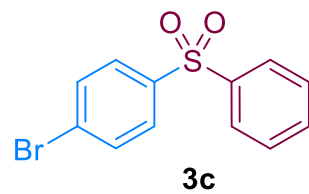

0.000

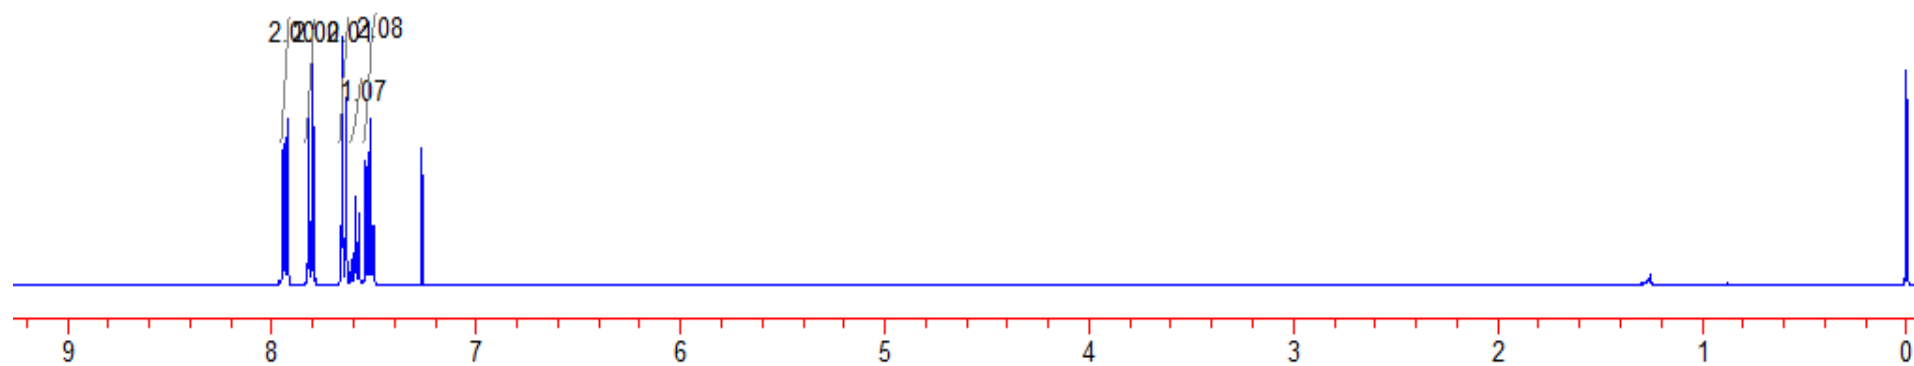

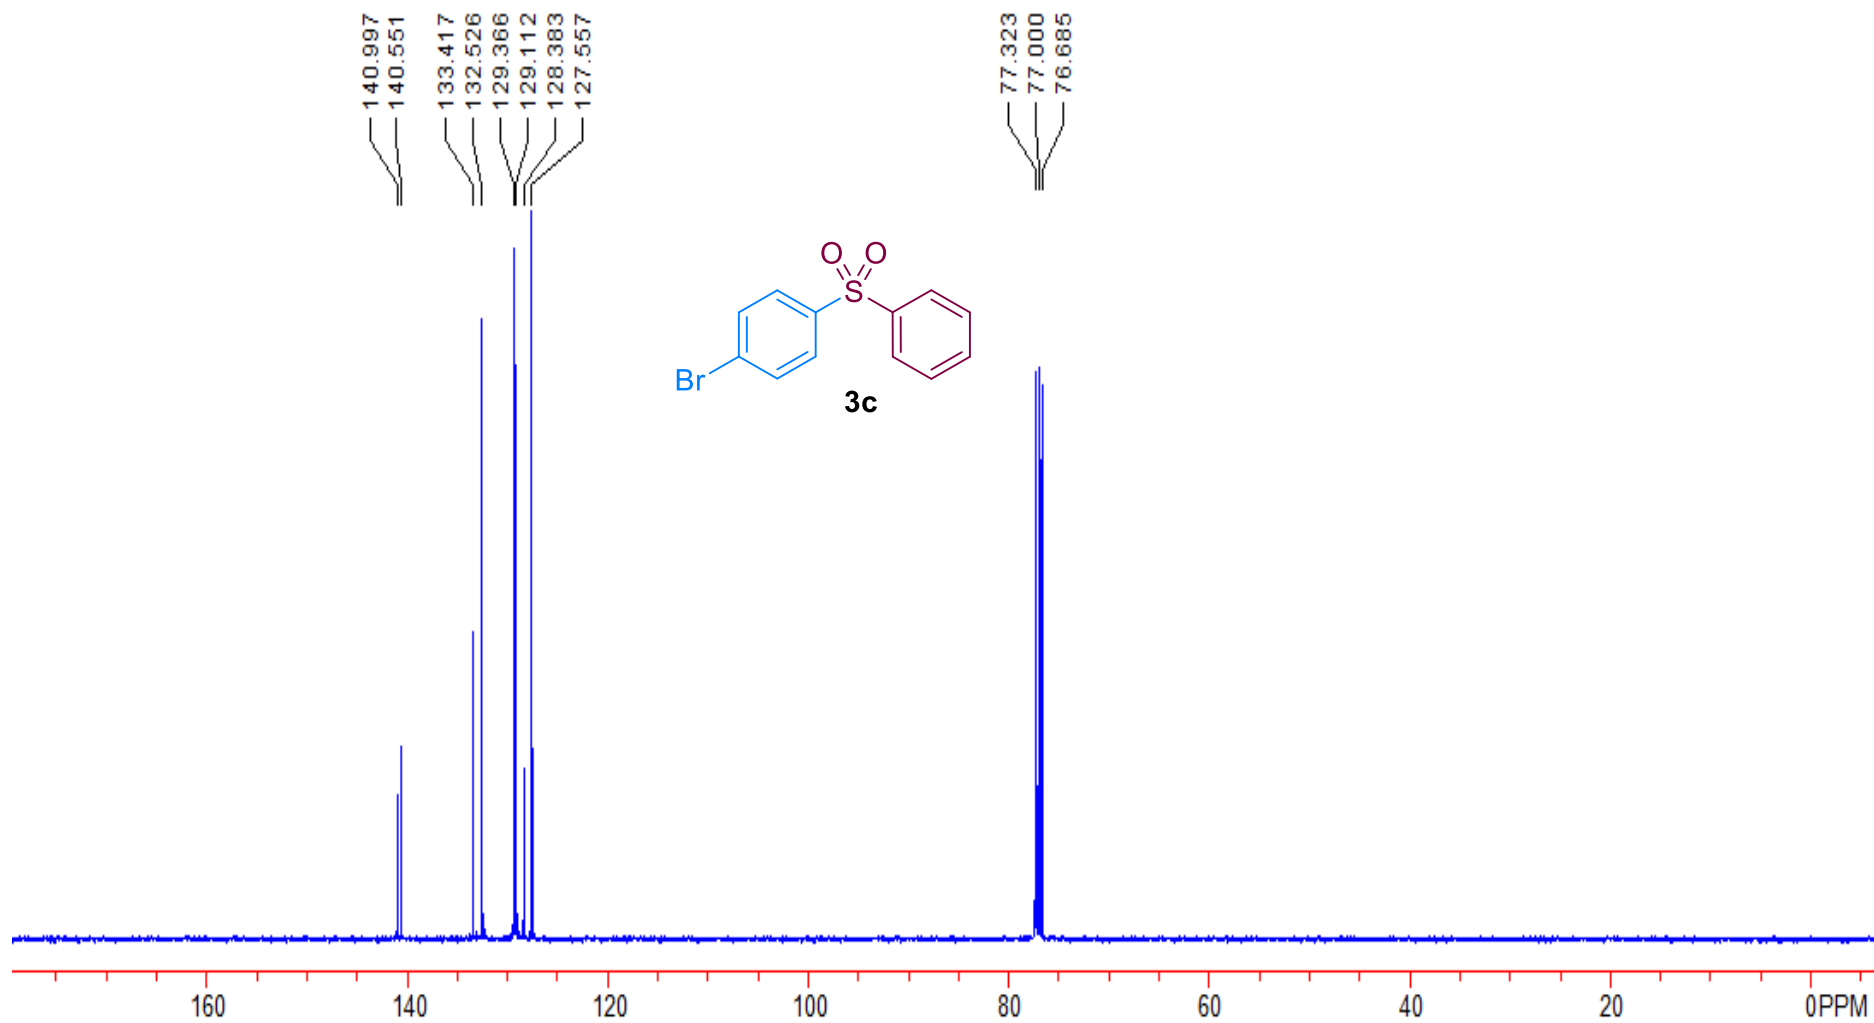



7.937  
7.934  
7.919  
7.915  
7.875  
7.869  
7.858  
7.853  
7.862  
7.657  
7.645  
7.640  
7.590  
7.572  
7.537  
7.520  
7.516  
7.499  
7.264

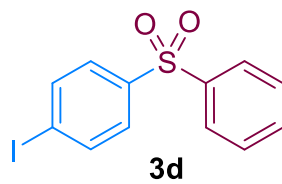

-0.000

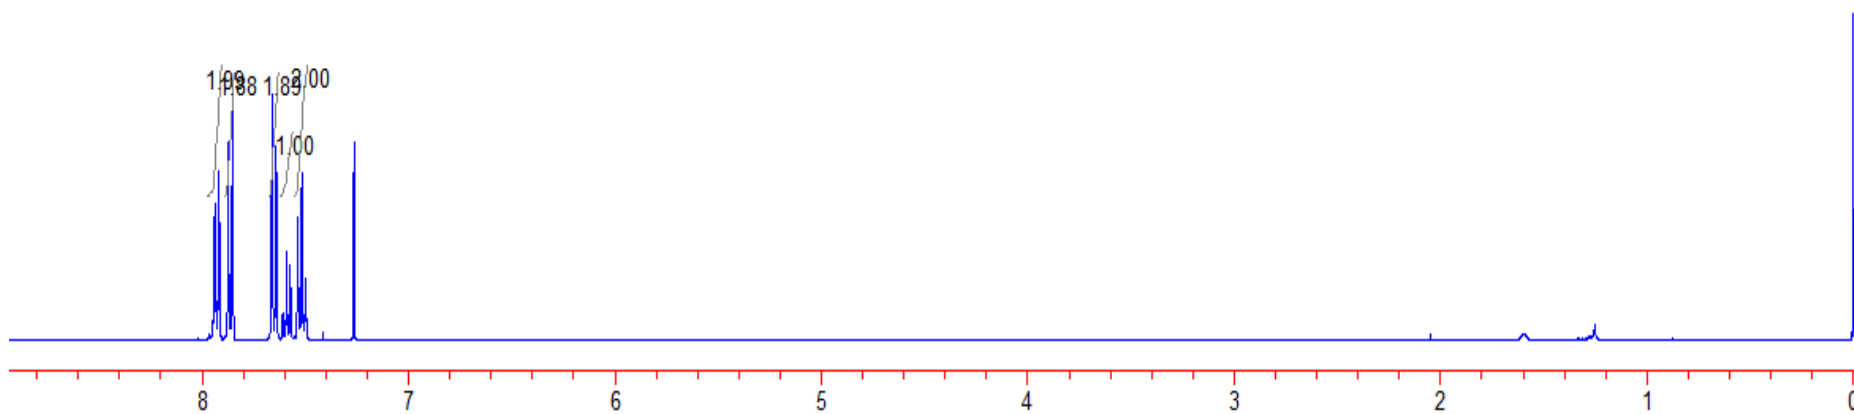

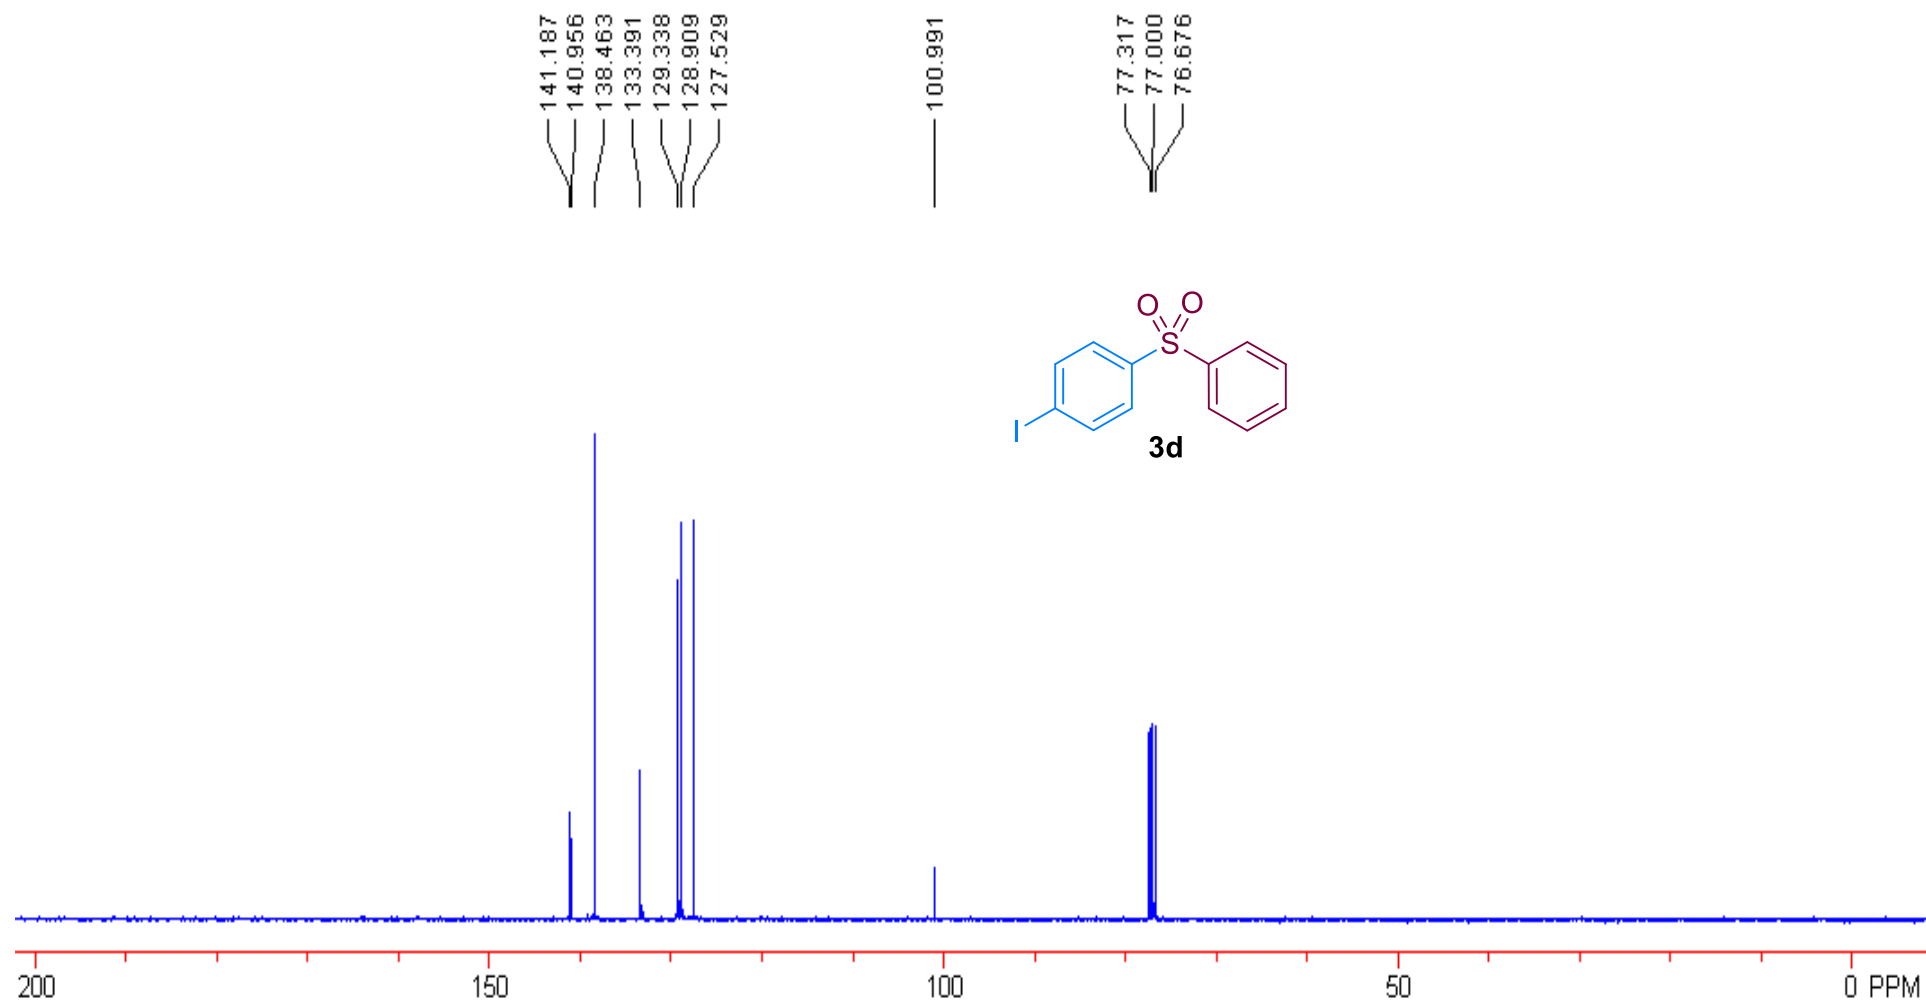

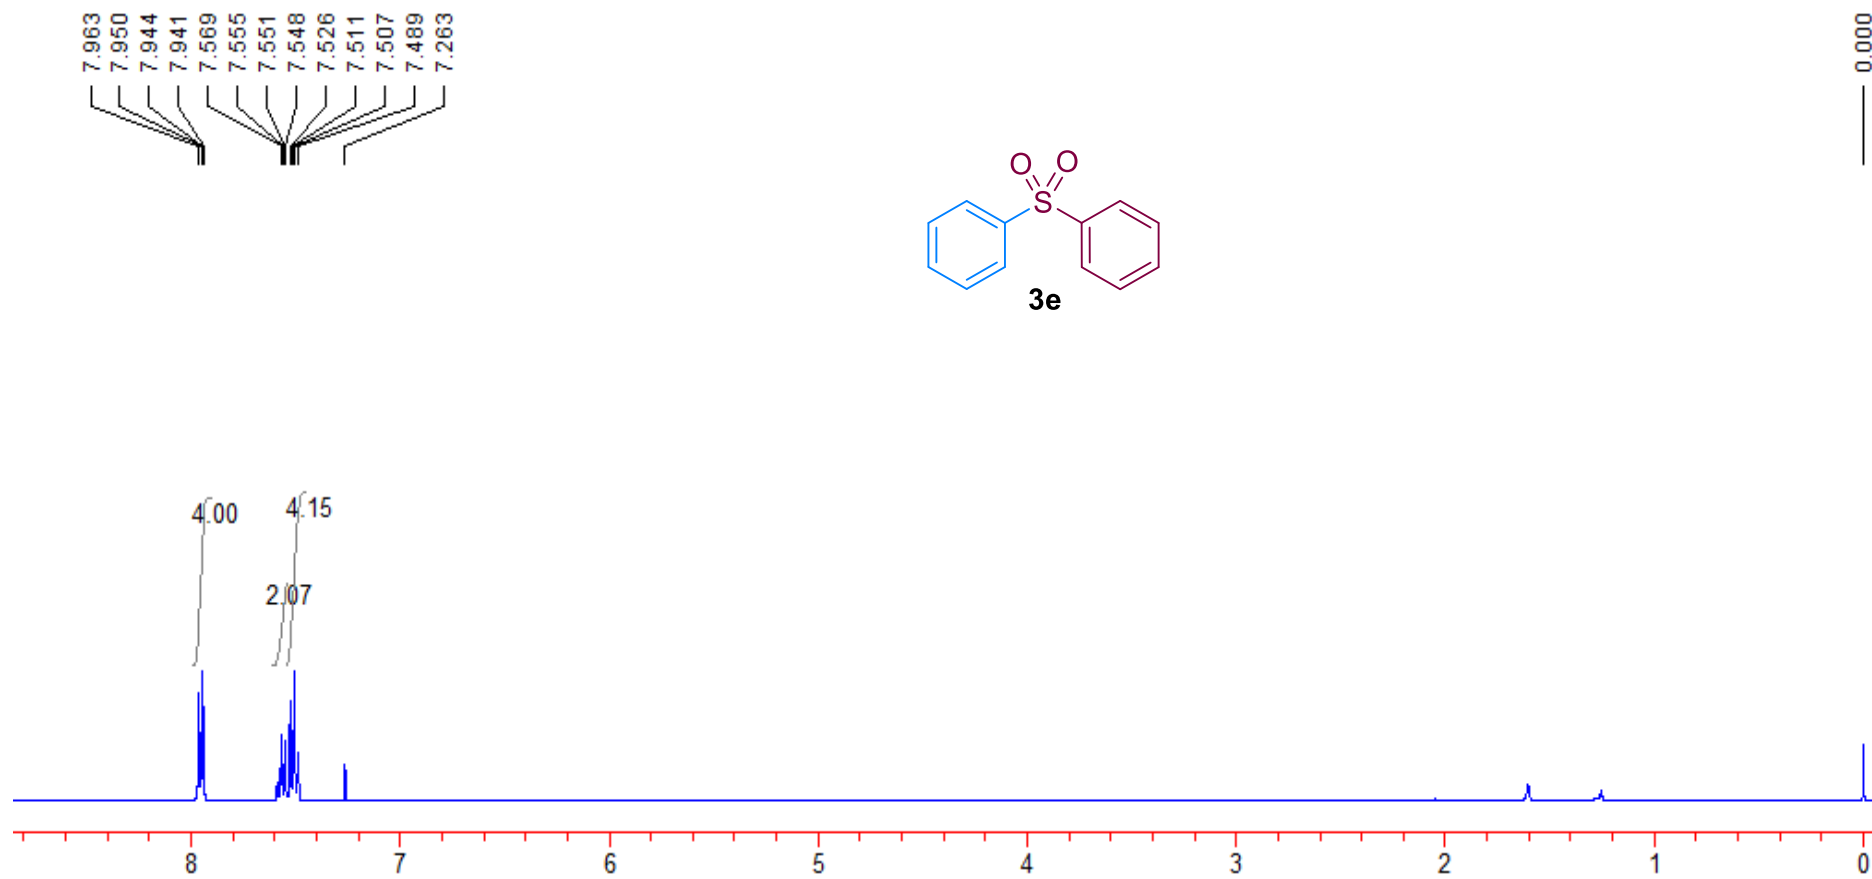

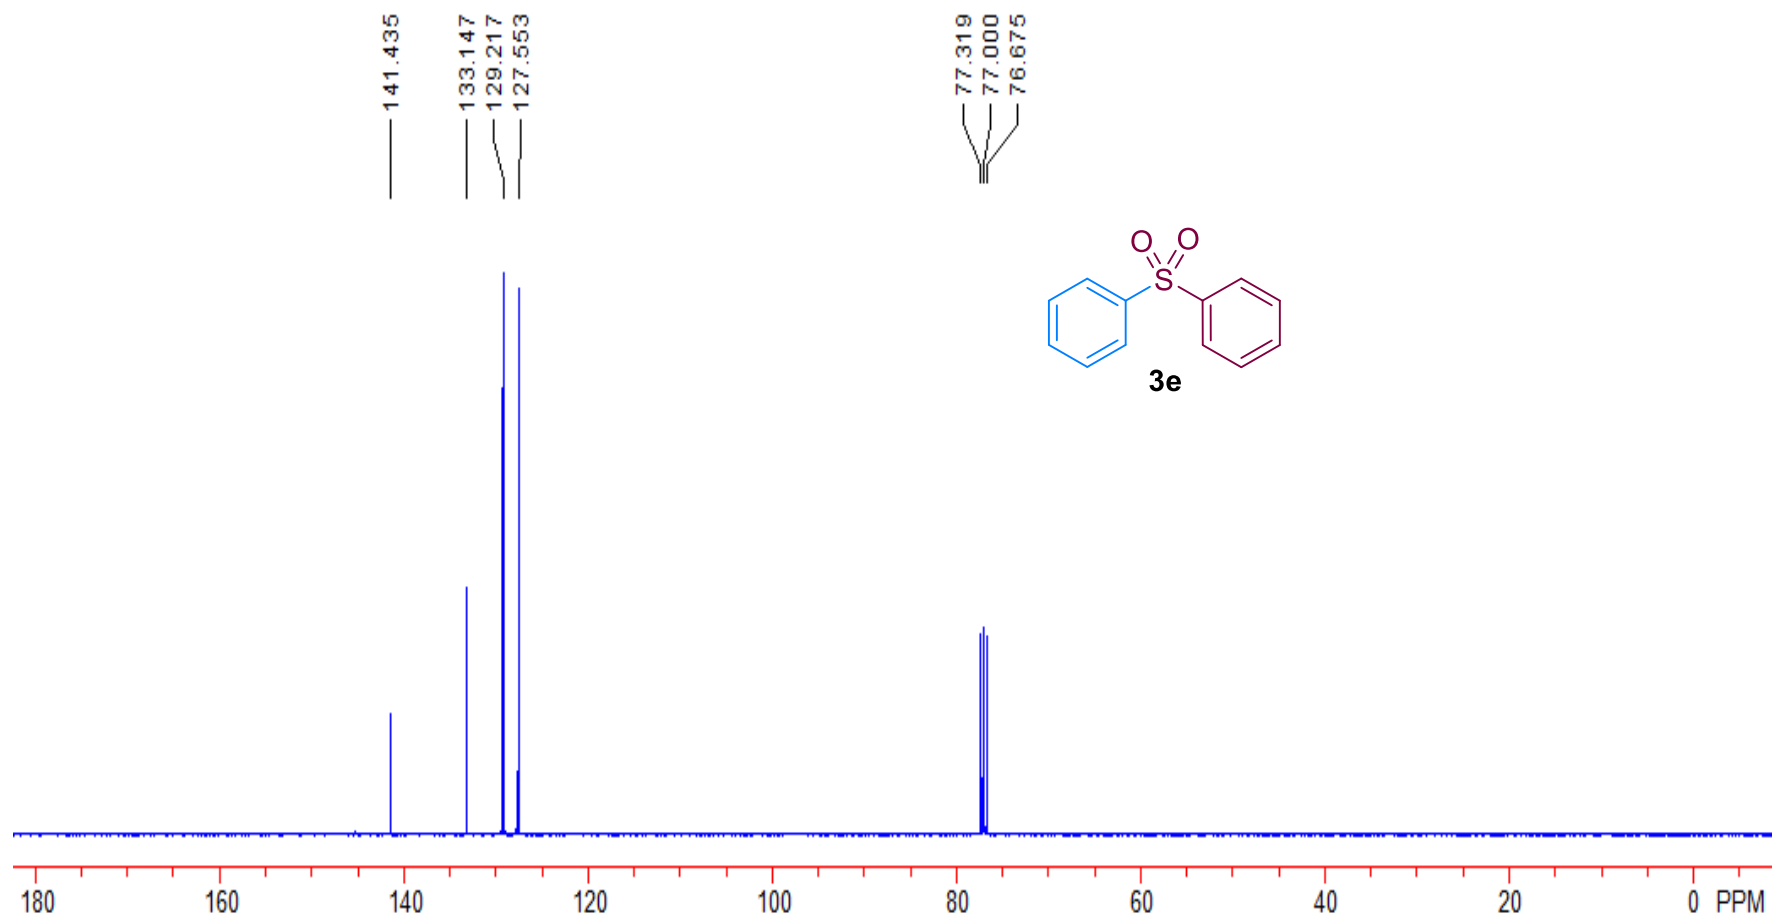

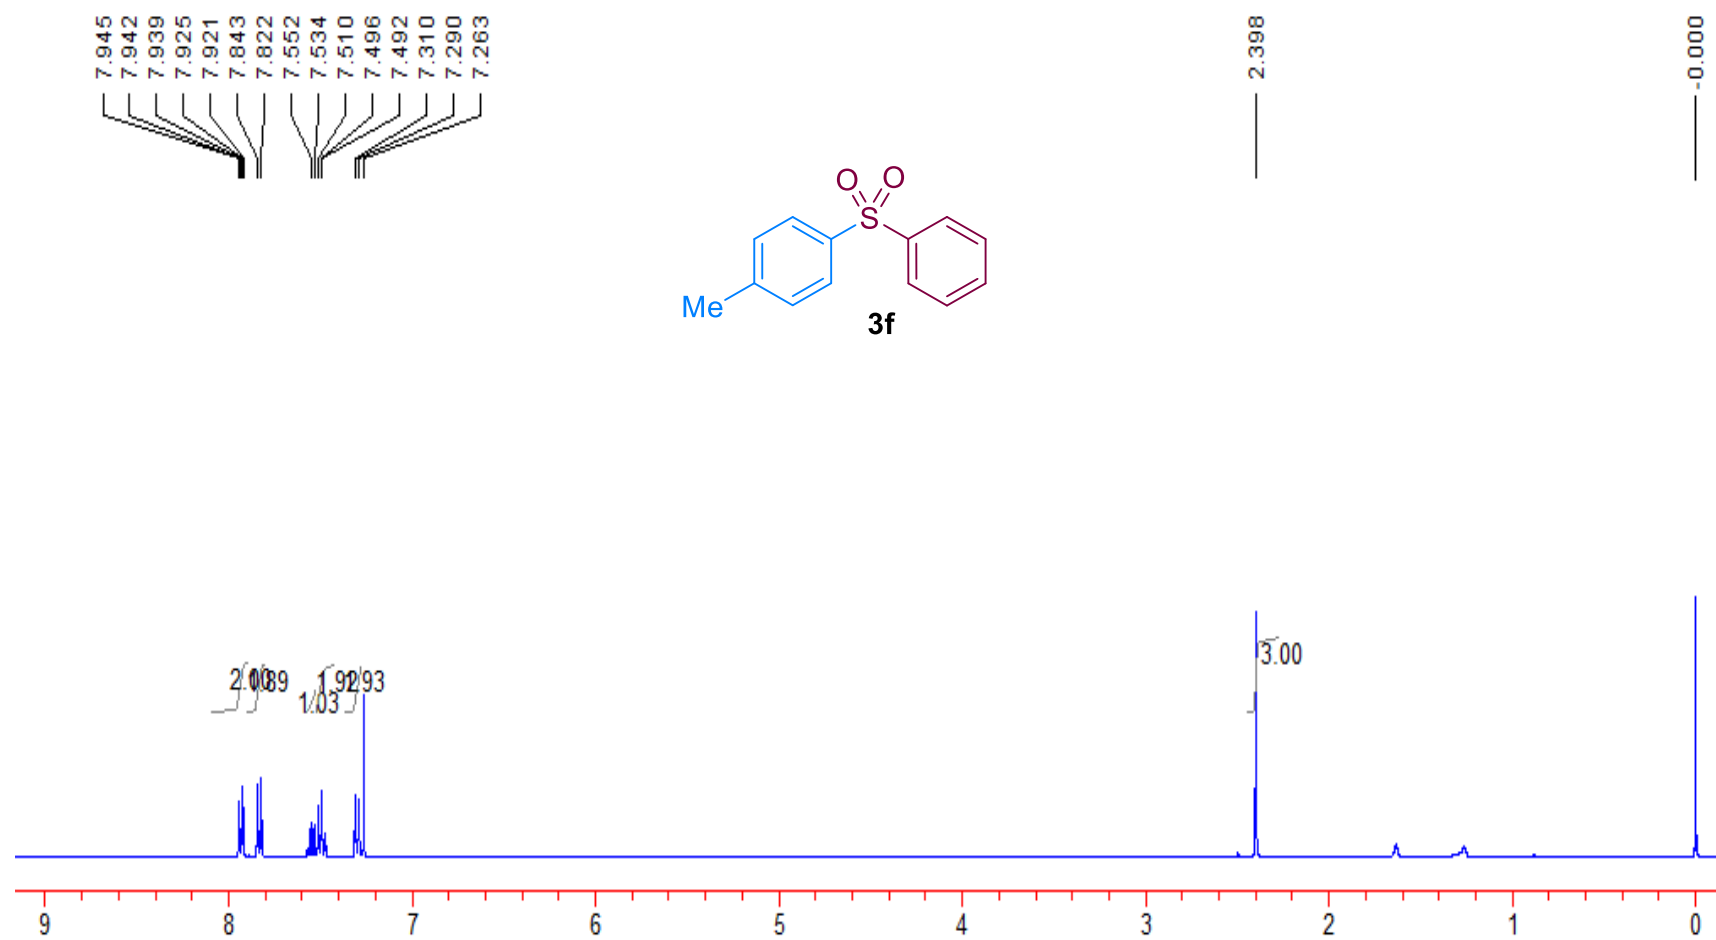

144.092  
141.810  
138.474  
132.921  
129.817  
129.124  
127.572  
127.347

77.314  
77.000  
76.684

21.451

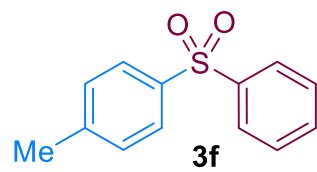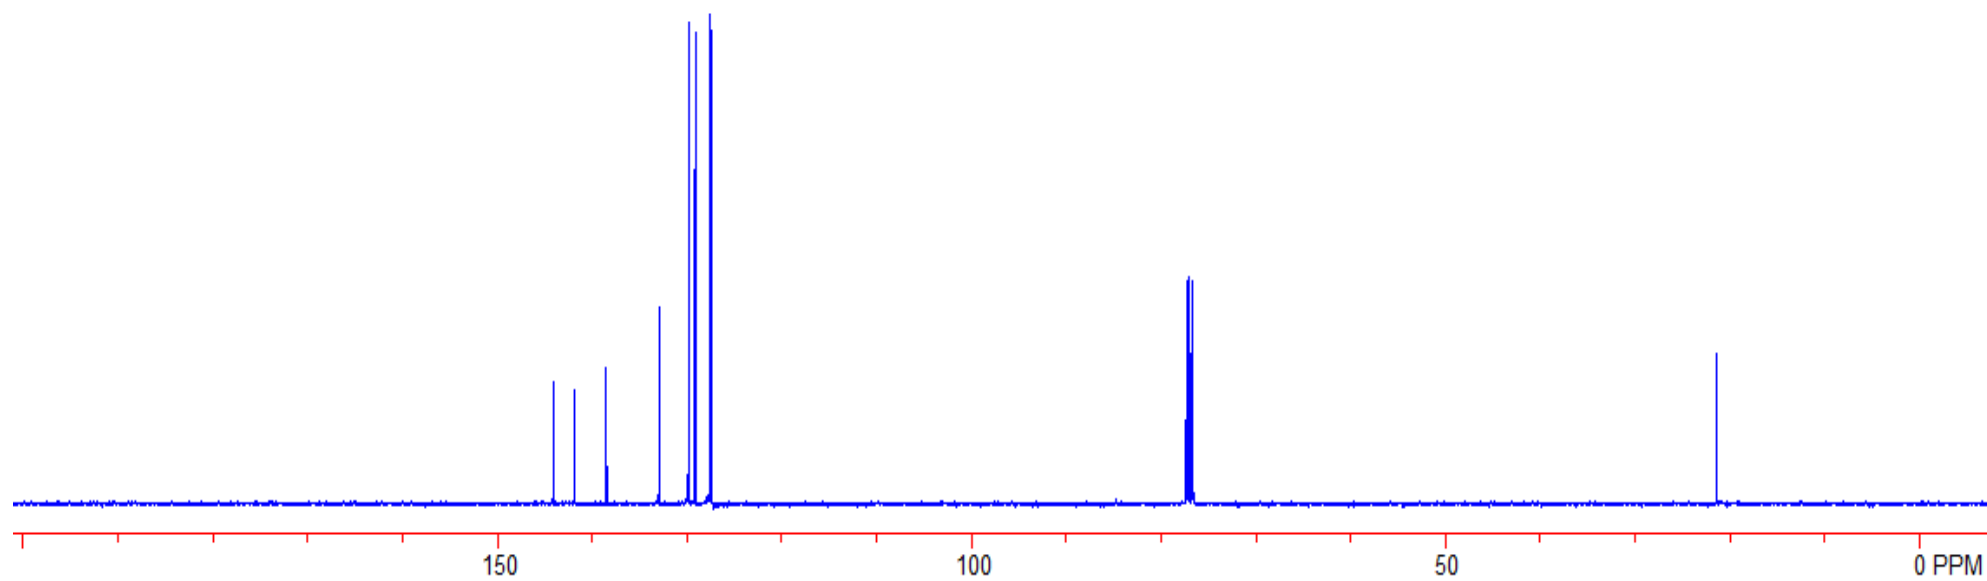

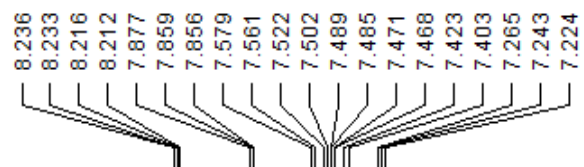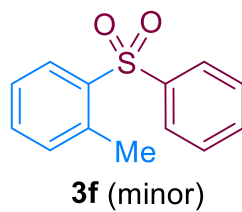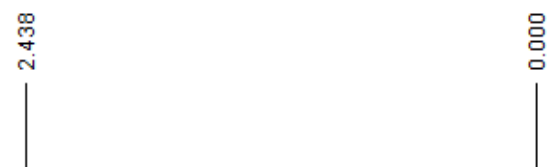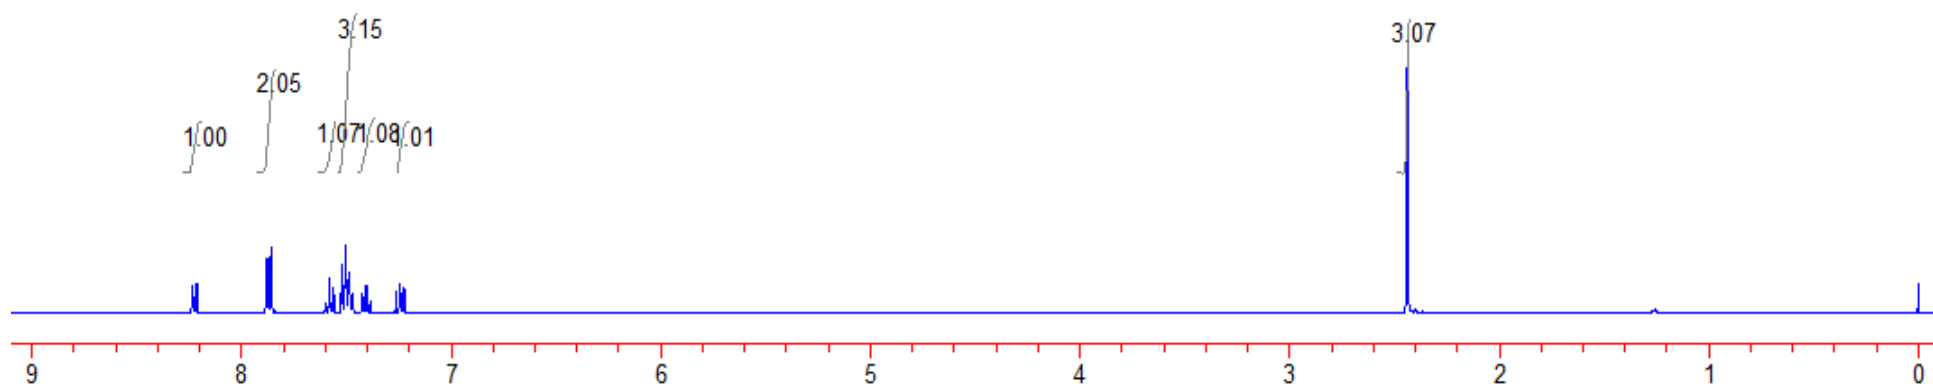

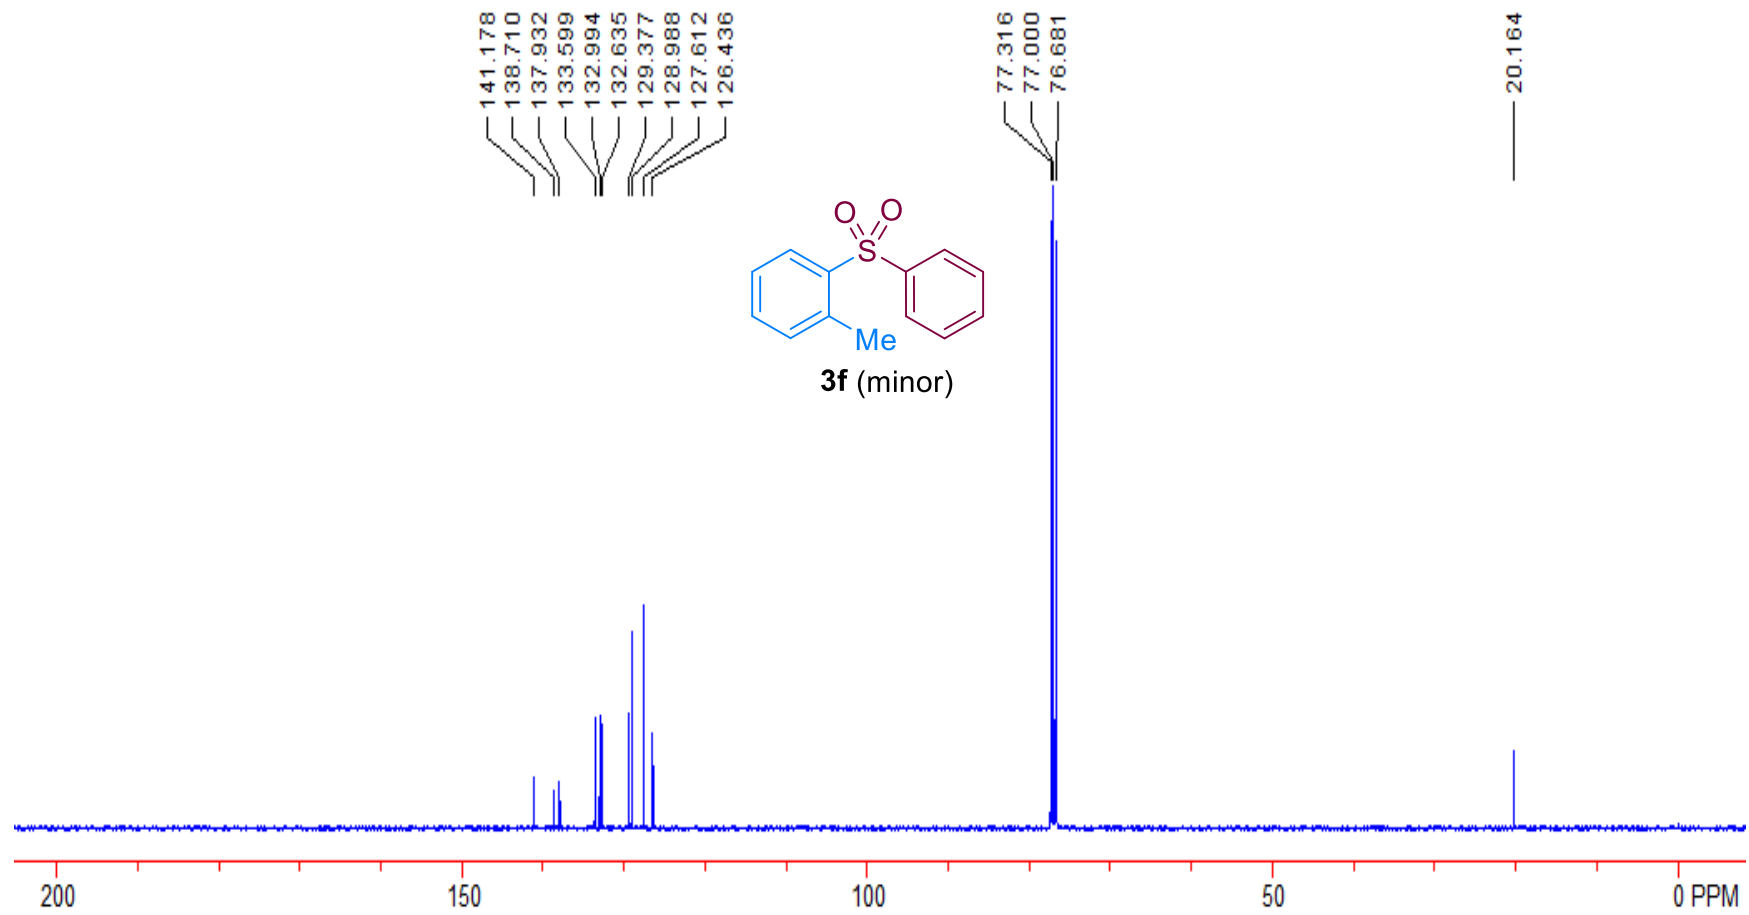



7.960  
7.958  
7.954  
7.940  
7.936  
7.868  
7.864  
7.852  
7.848  
7.558  
7.543  
7.541  
7.519  
7.515  
7.504  
7.500  
7.483  
7.356  
7.335  
7.263

2.947  
2.930

1.264  
1.245  
1.228

-0.000

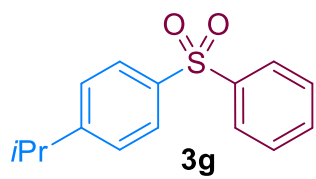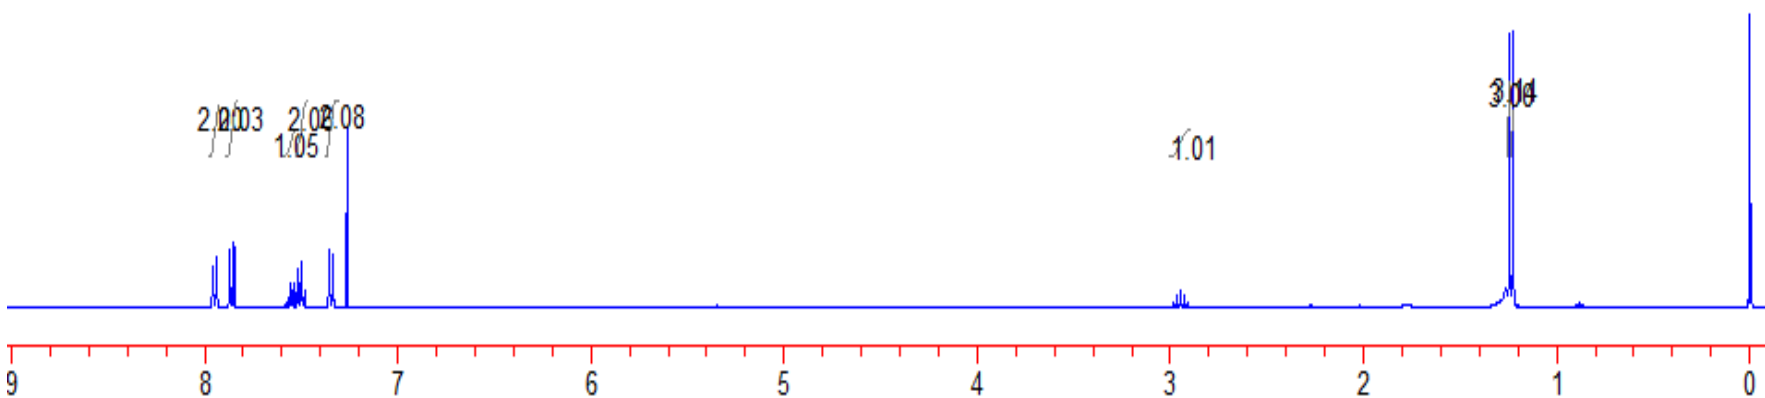

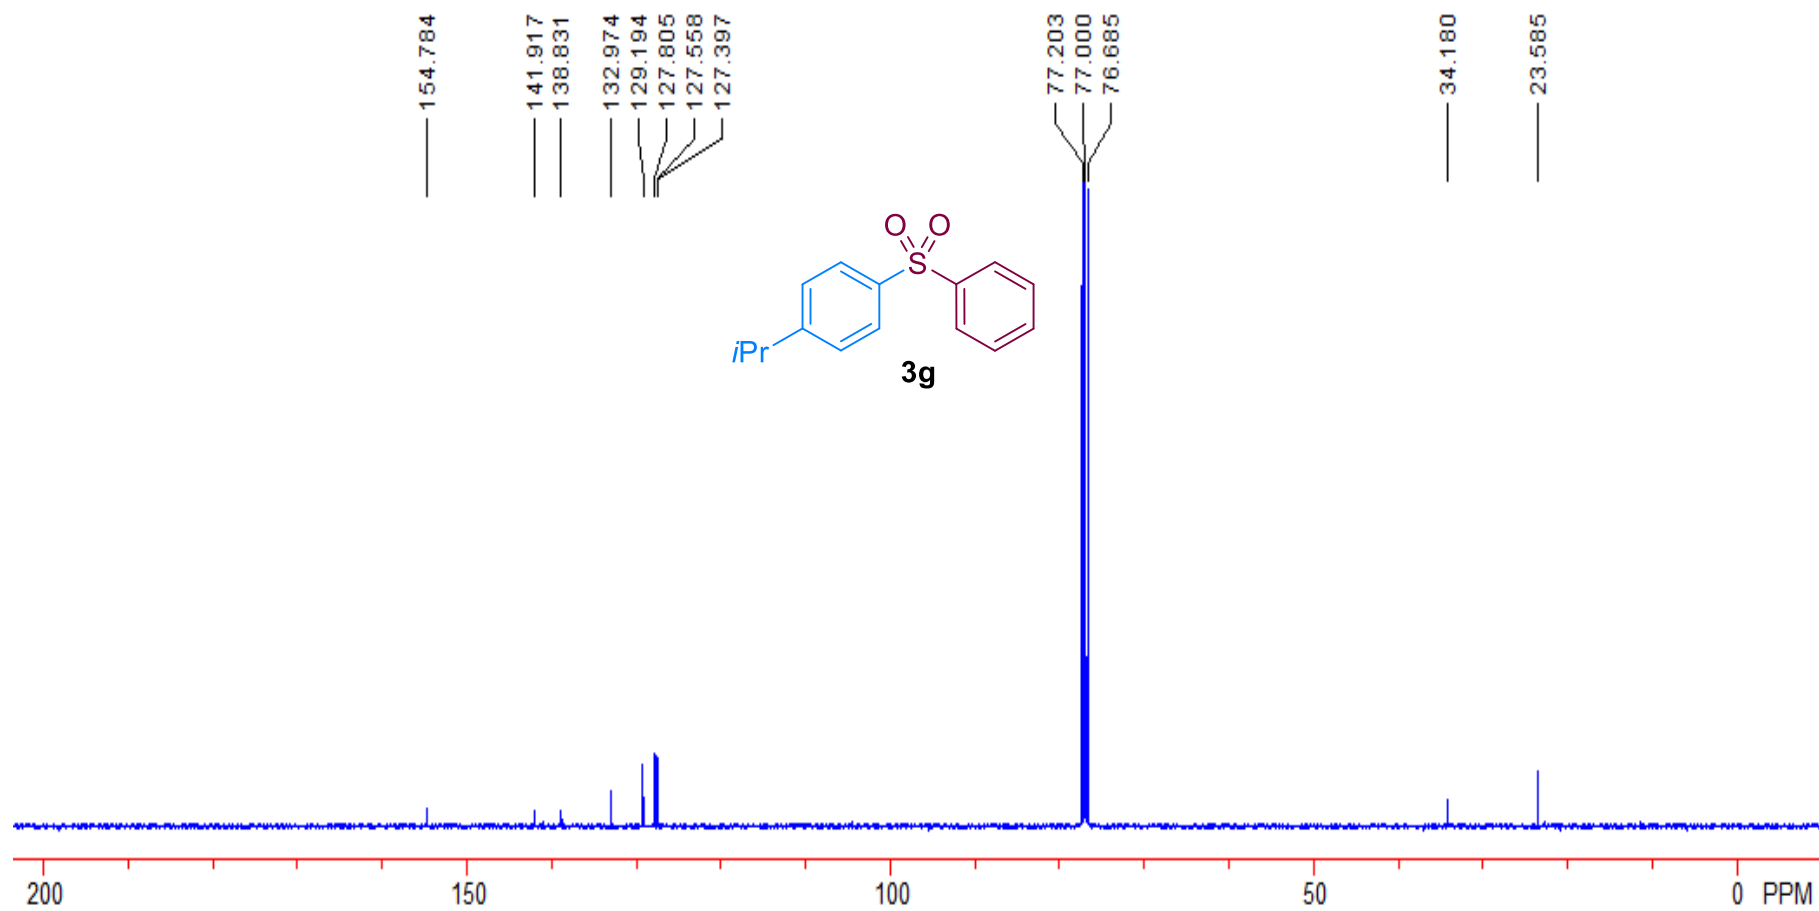

8.231  
8.228  
8.211  
8.208  
7.846  
7.827  
7.824  
7.571  
7.563  
7.556  
7.553  
7.548  
7.545  
7.511  
7.495  
7.492  
7.474  
7.426  
7.407  
7.398  
7.378  
7.260

3.700

1.550

0.980  
0.963

-0.002

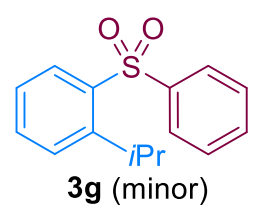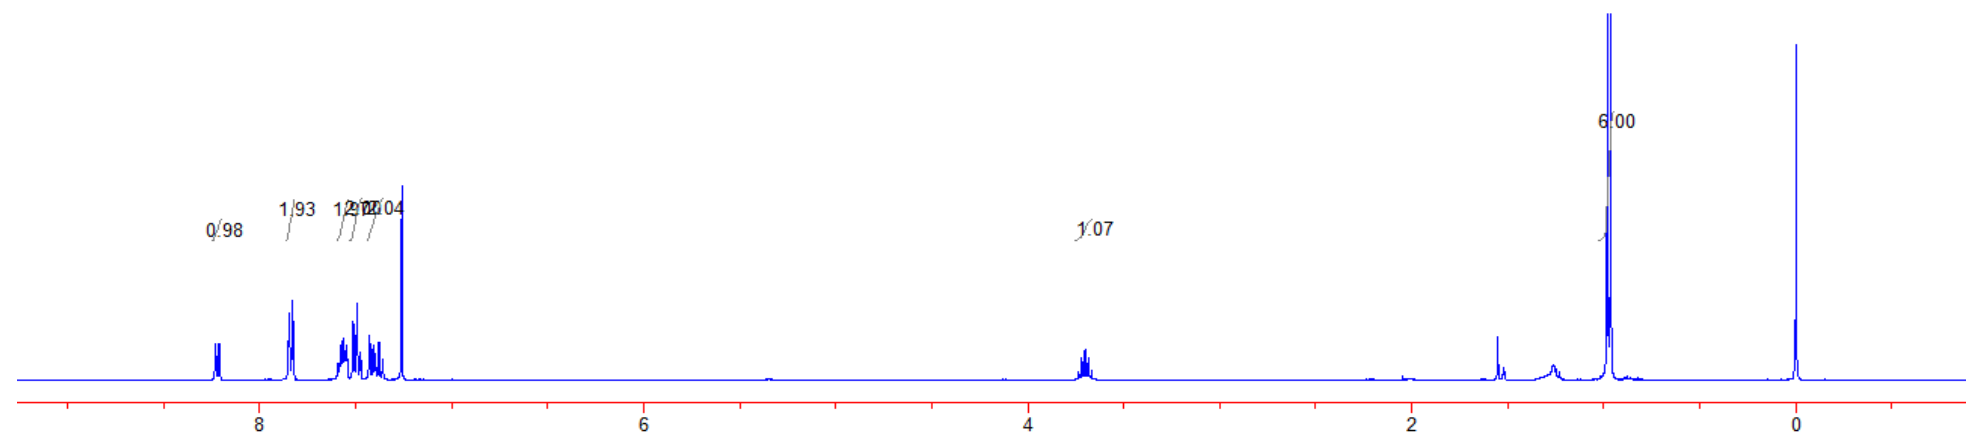

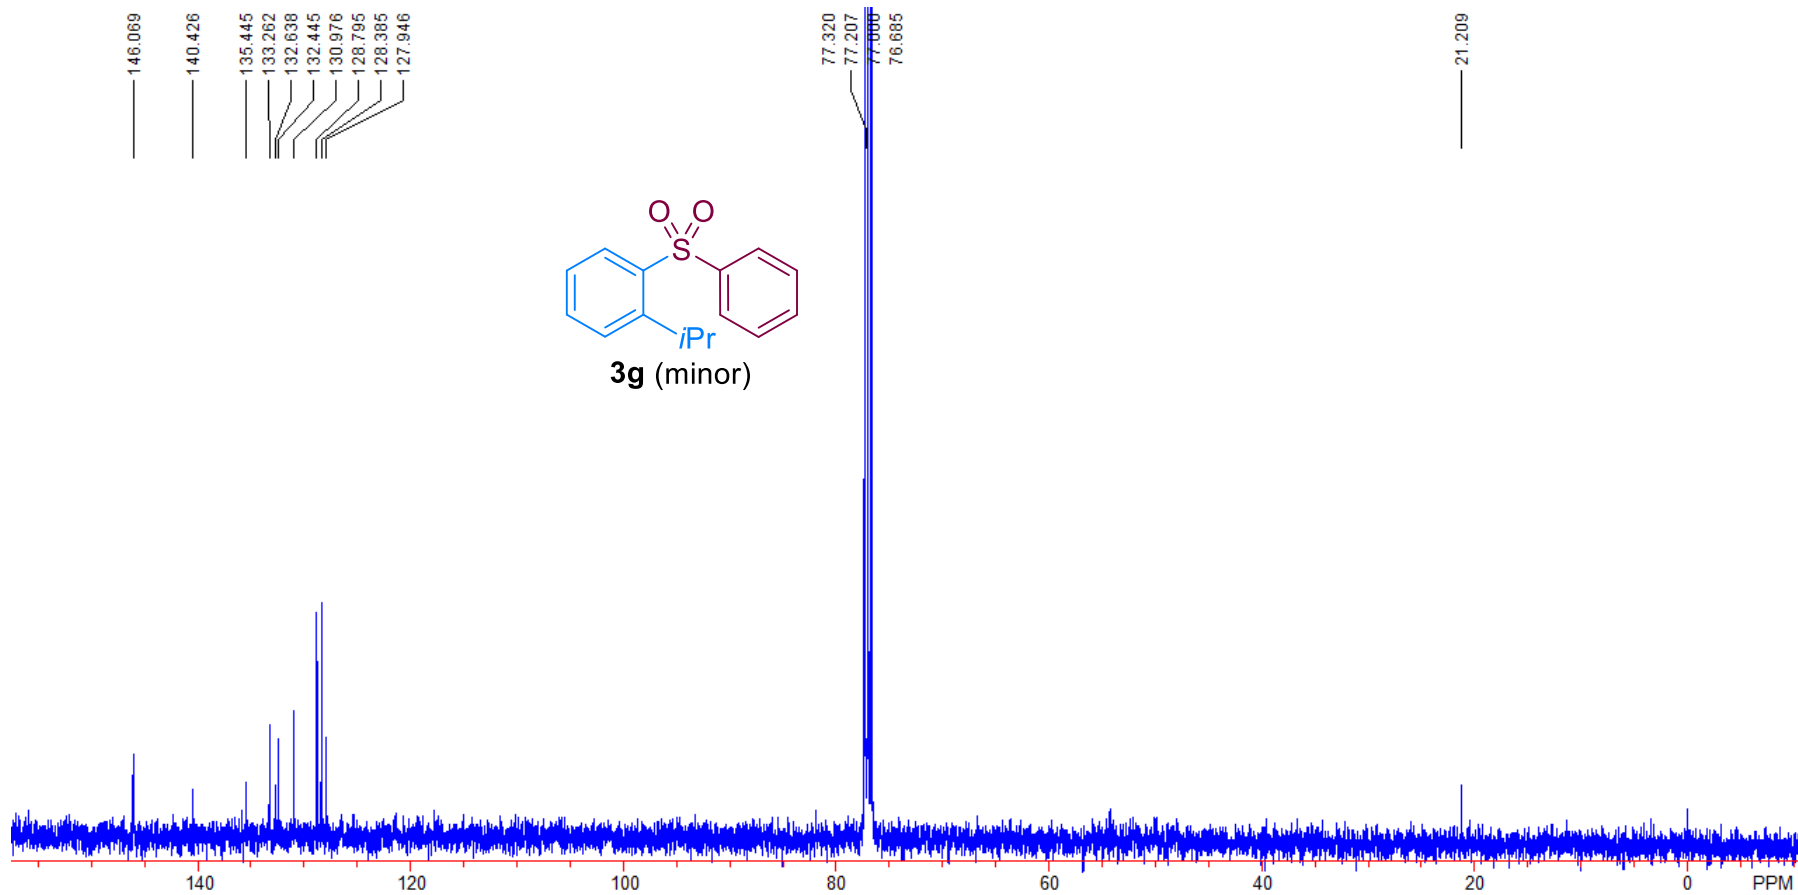

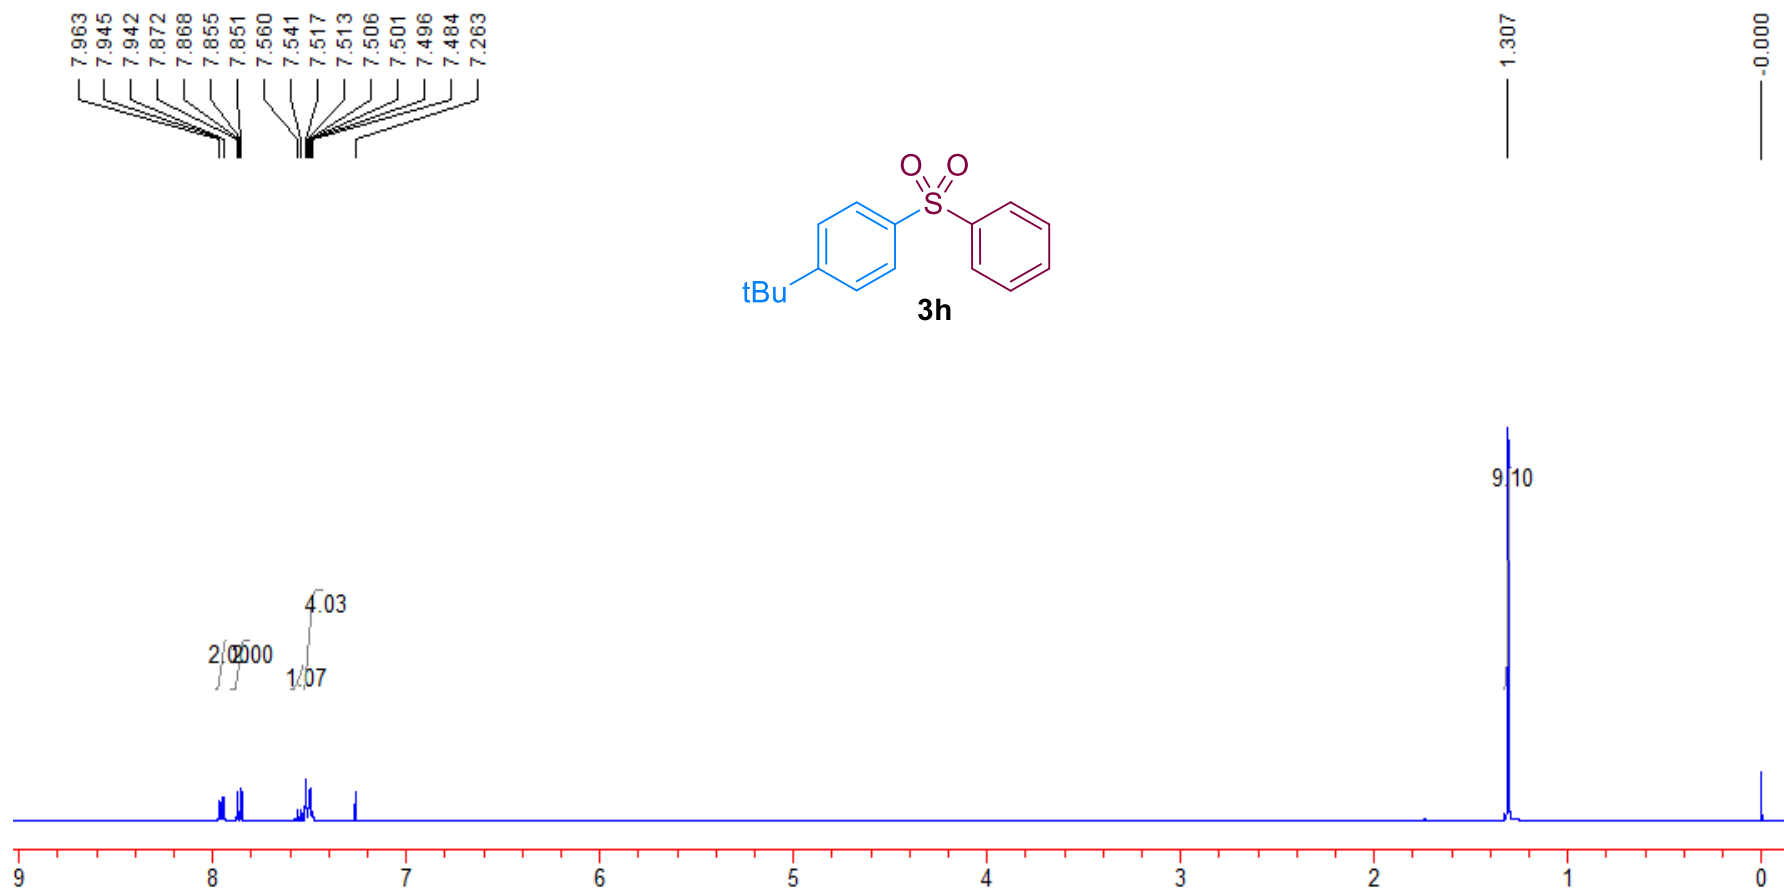

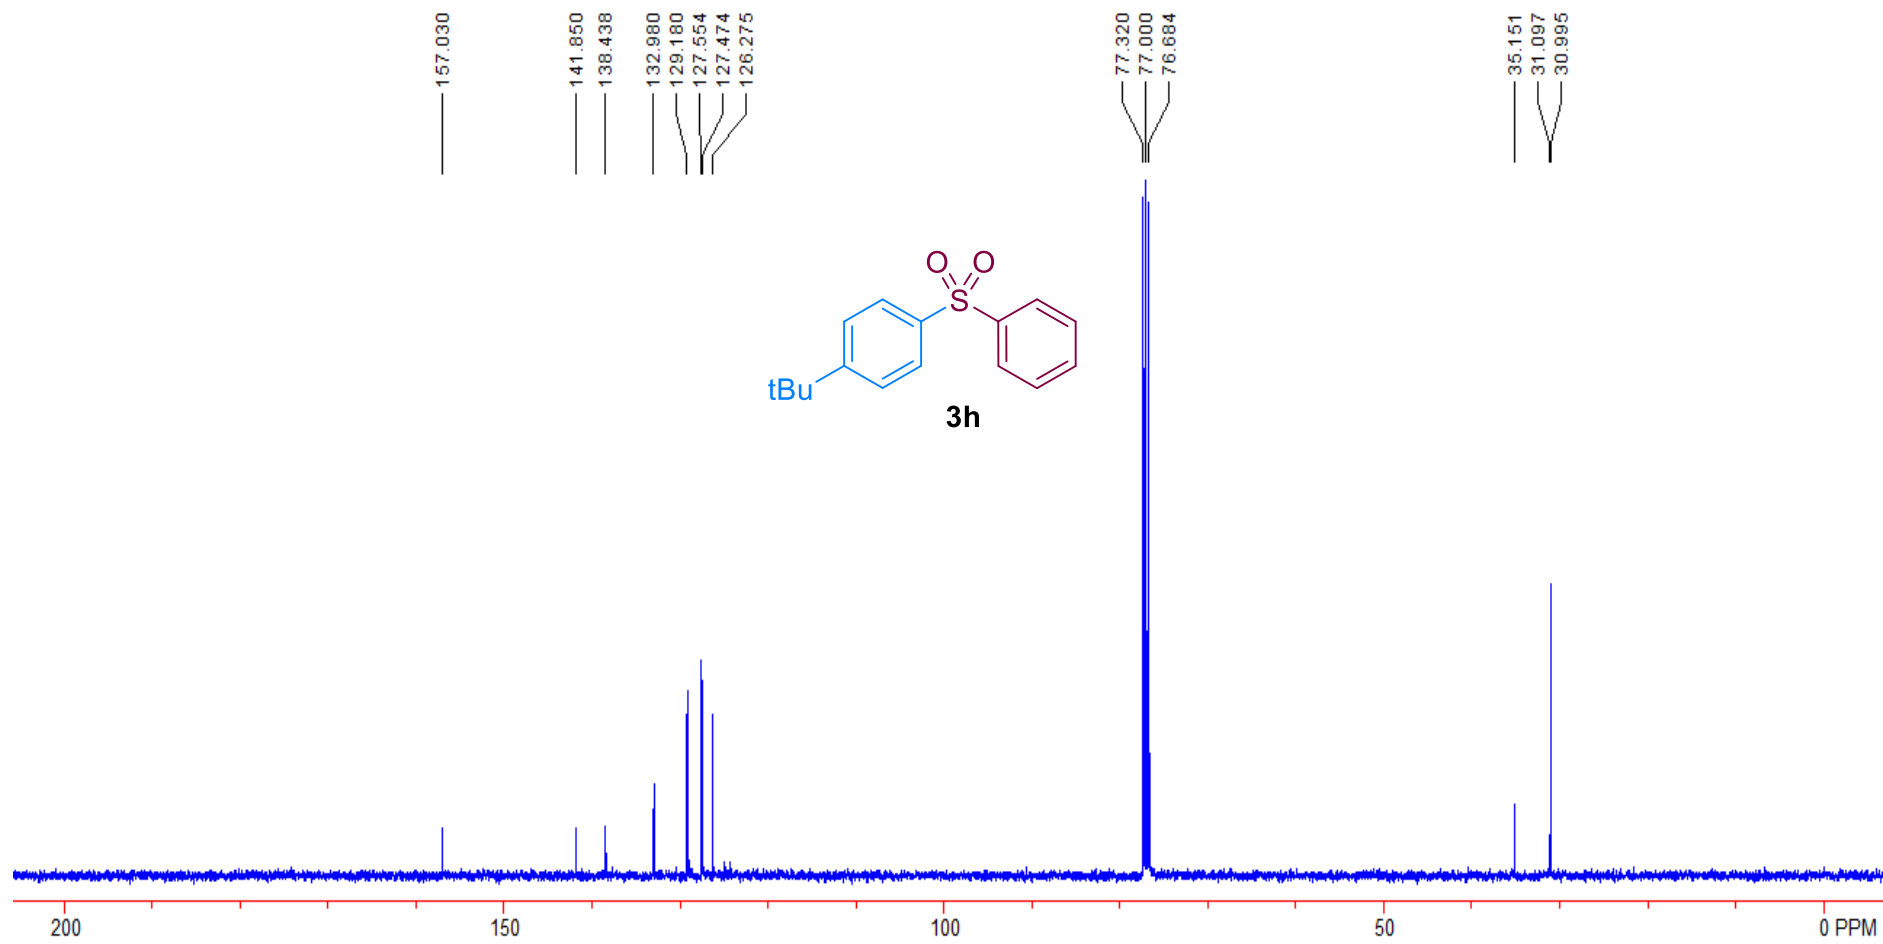

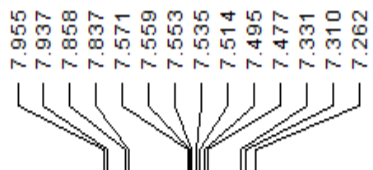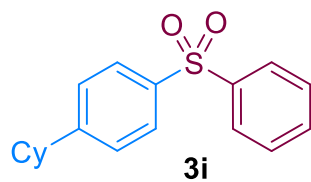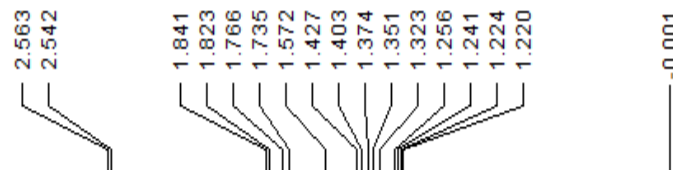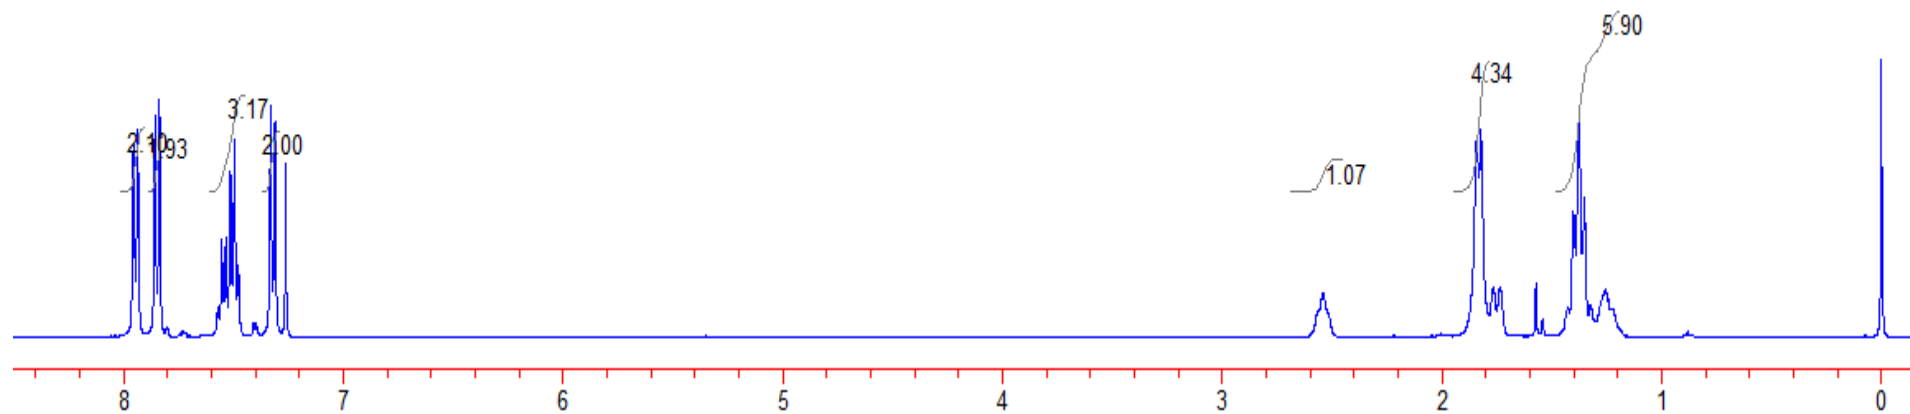

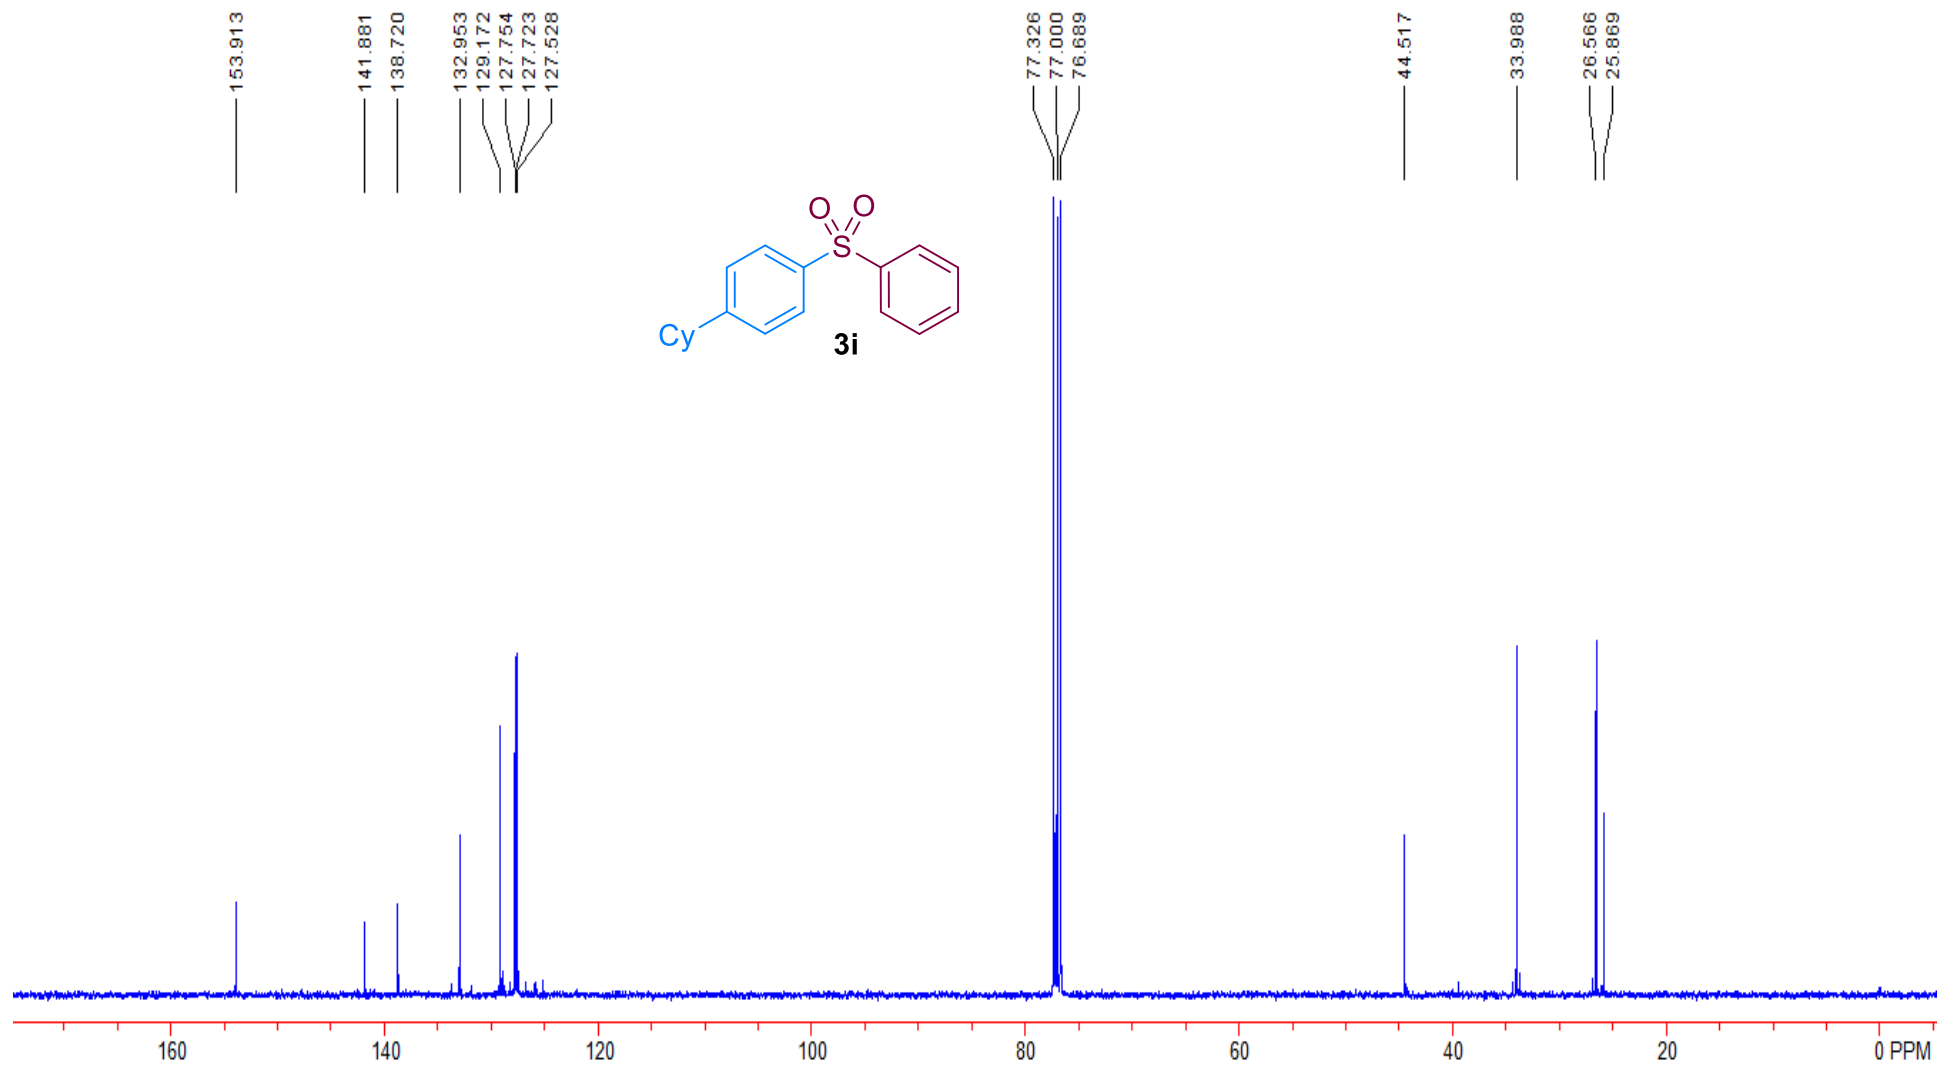



8.281  
8.277  
8.260  
8.256  
7.869  
7.865  
7.851  
7.847  
7.567  
7.559  
7.548  
7.516  
7.501  
7.497  
7.398  
7.387  
7.383  
7.379  
7.362  
7.263

1.681  
1.664  
1.289  
1.190  
1.174  
0.000

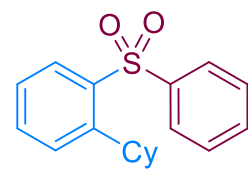

**3i** (minor)

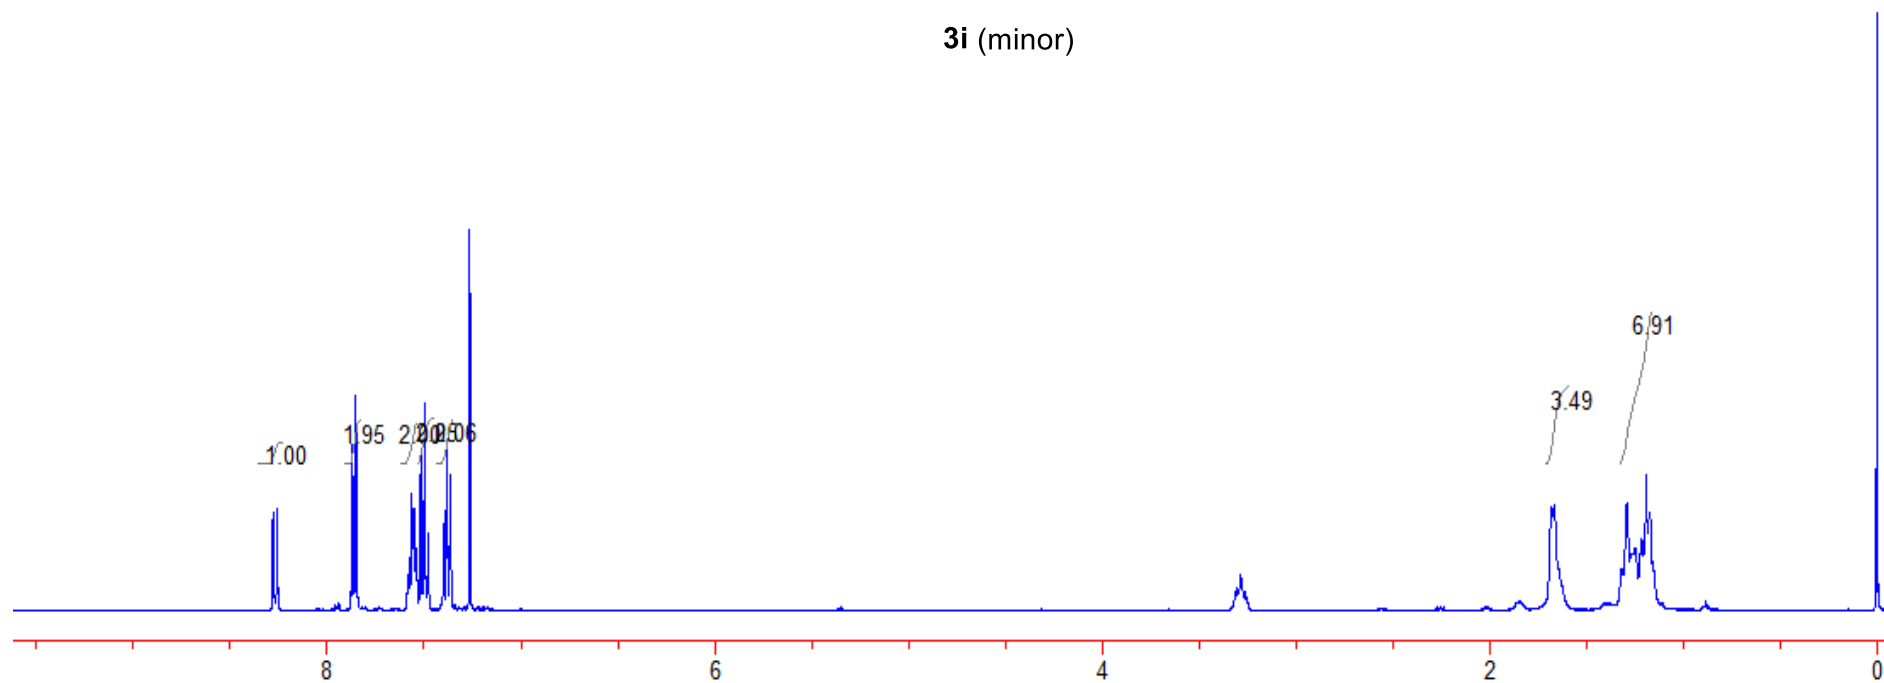

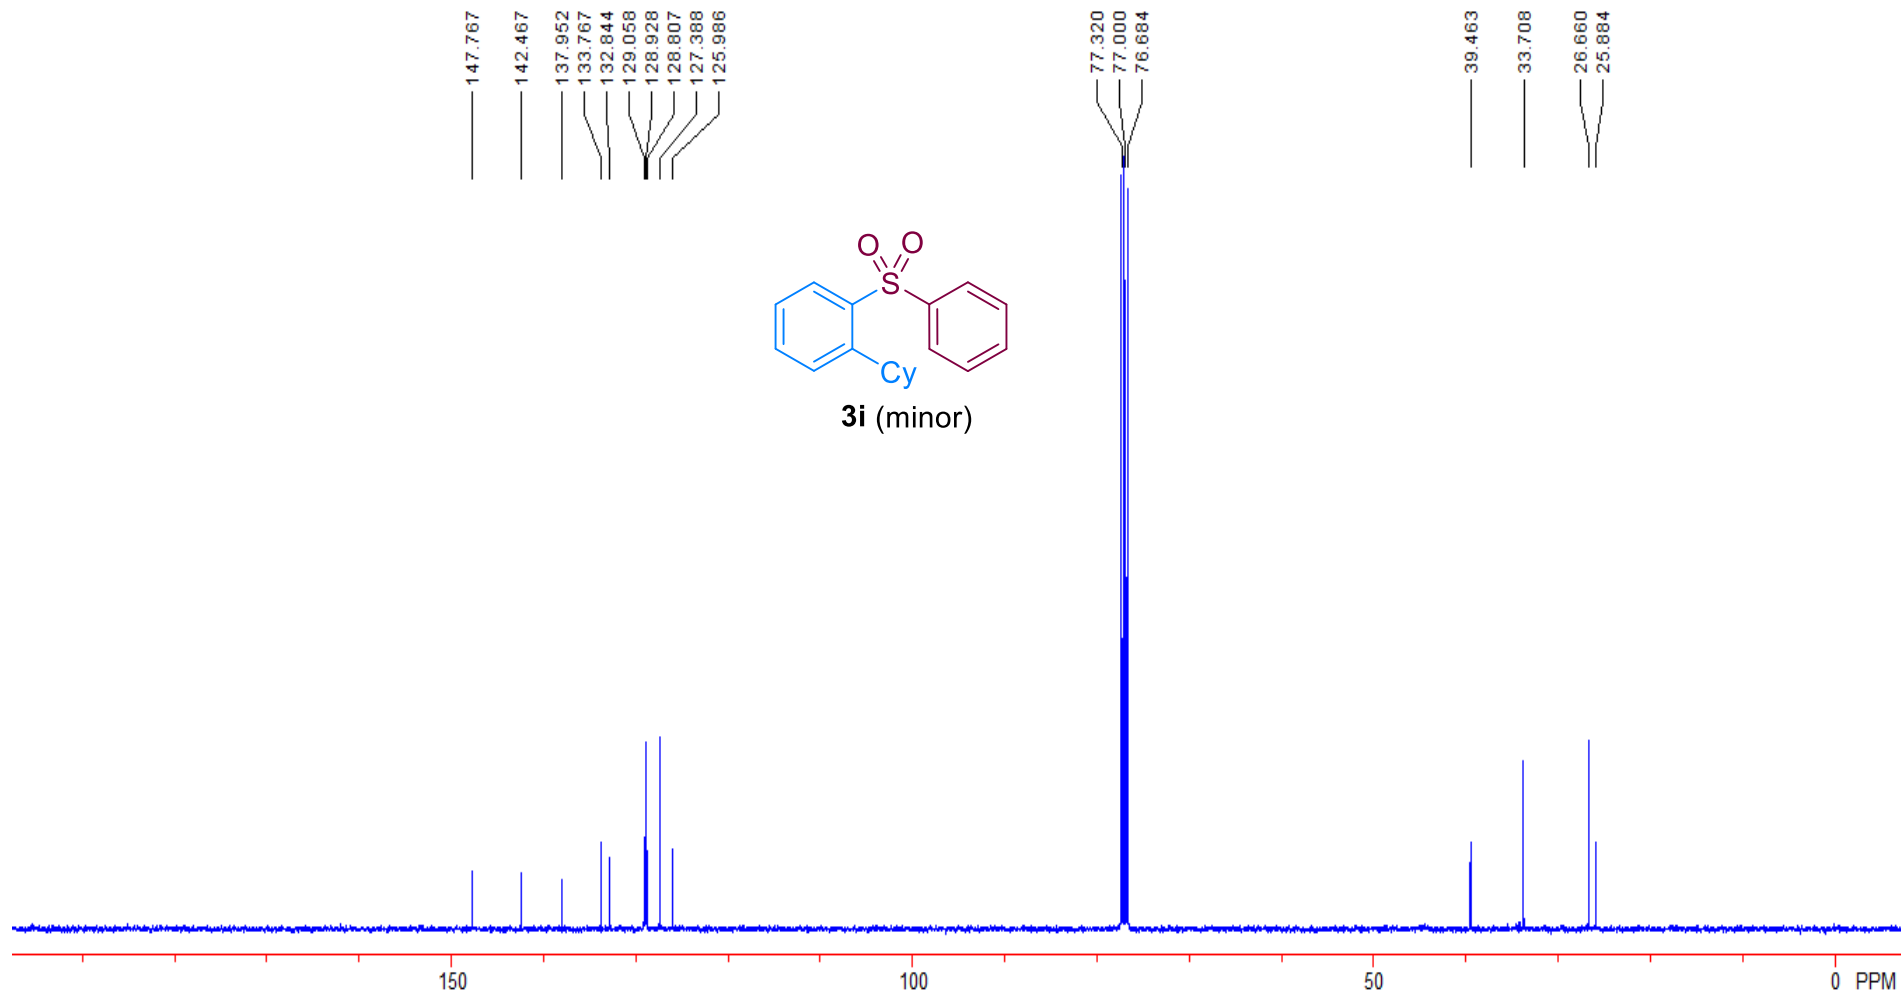

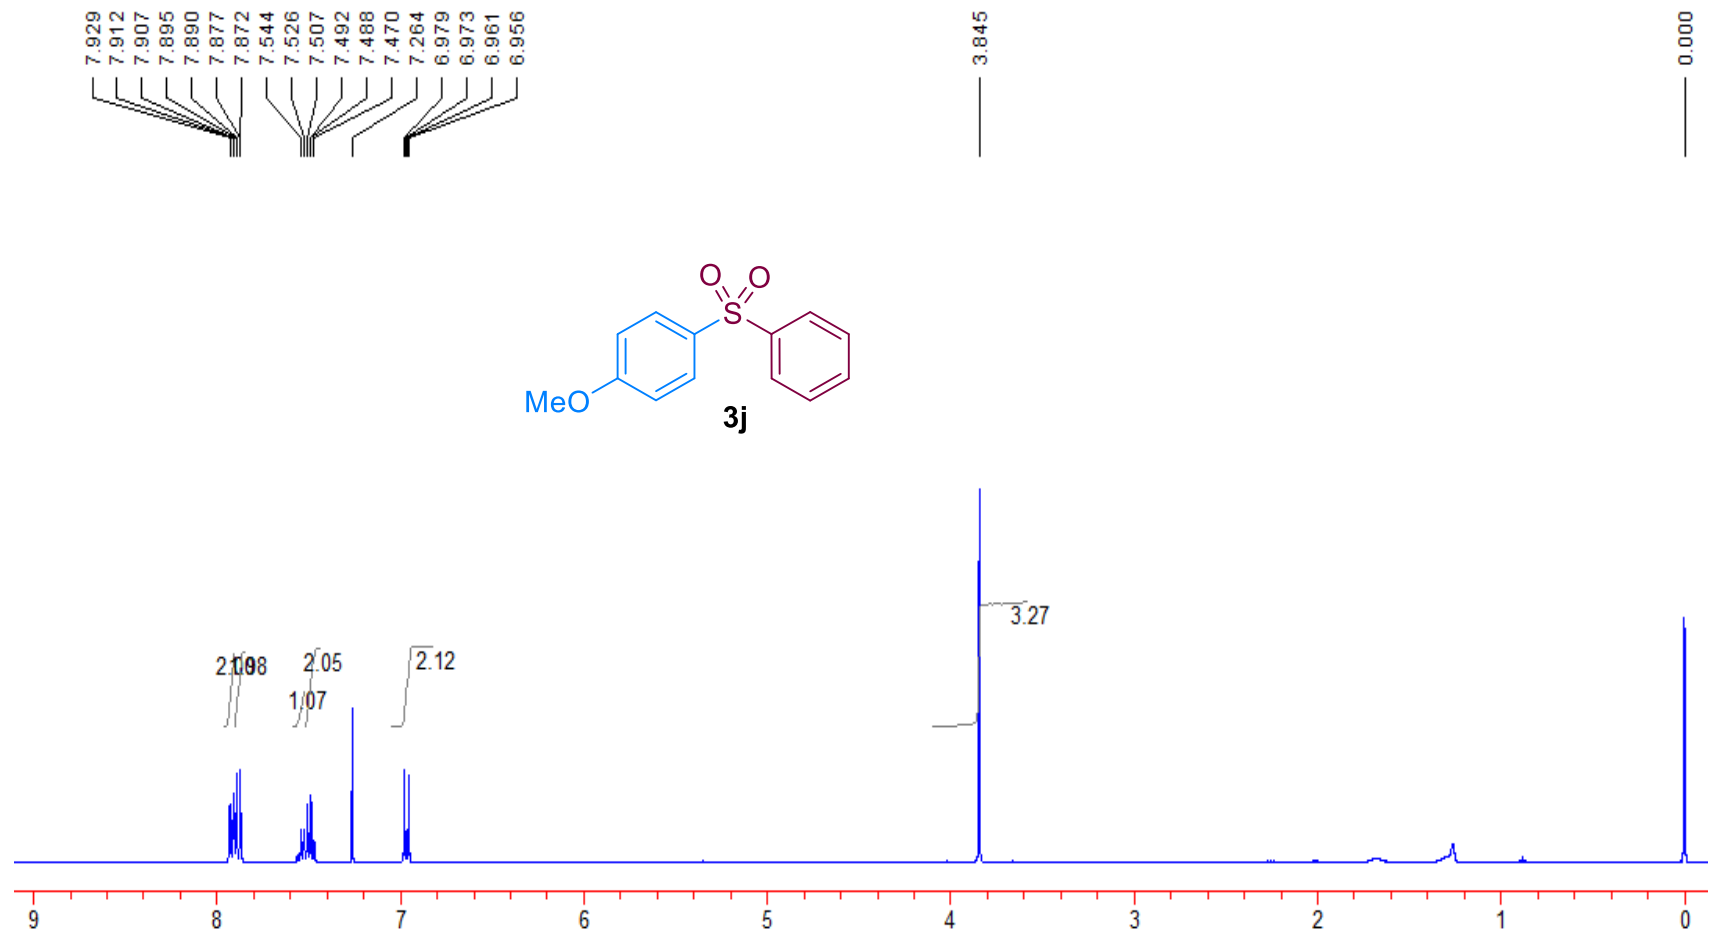

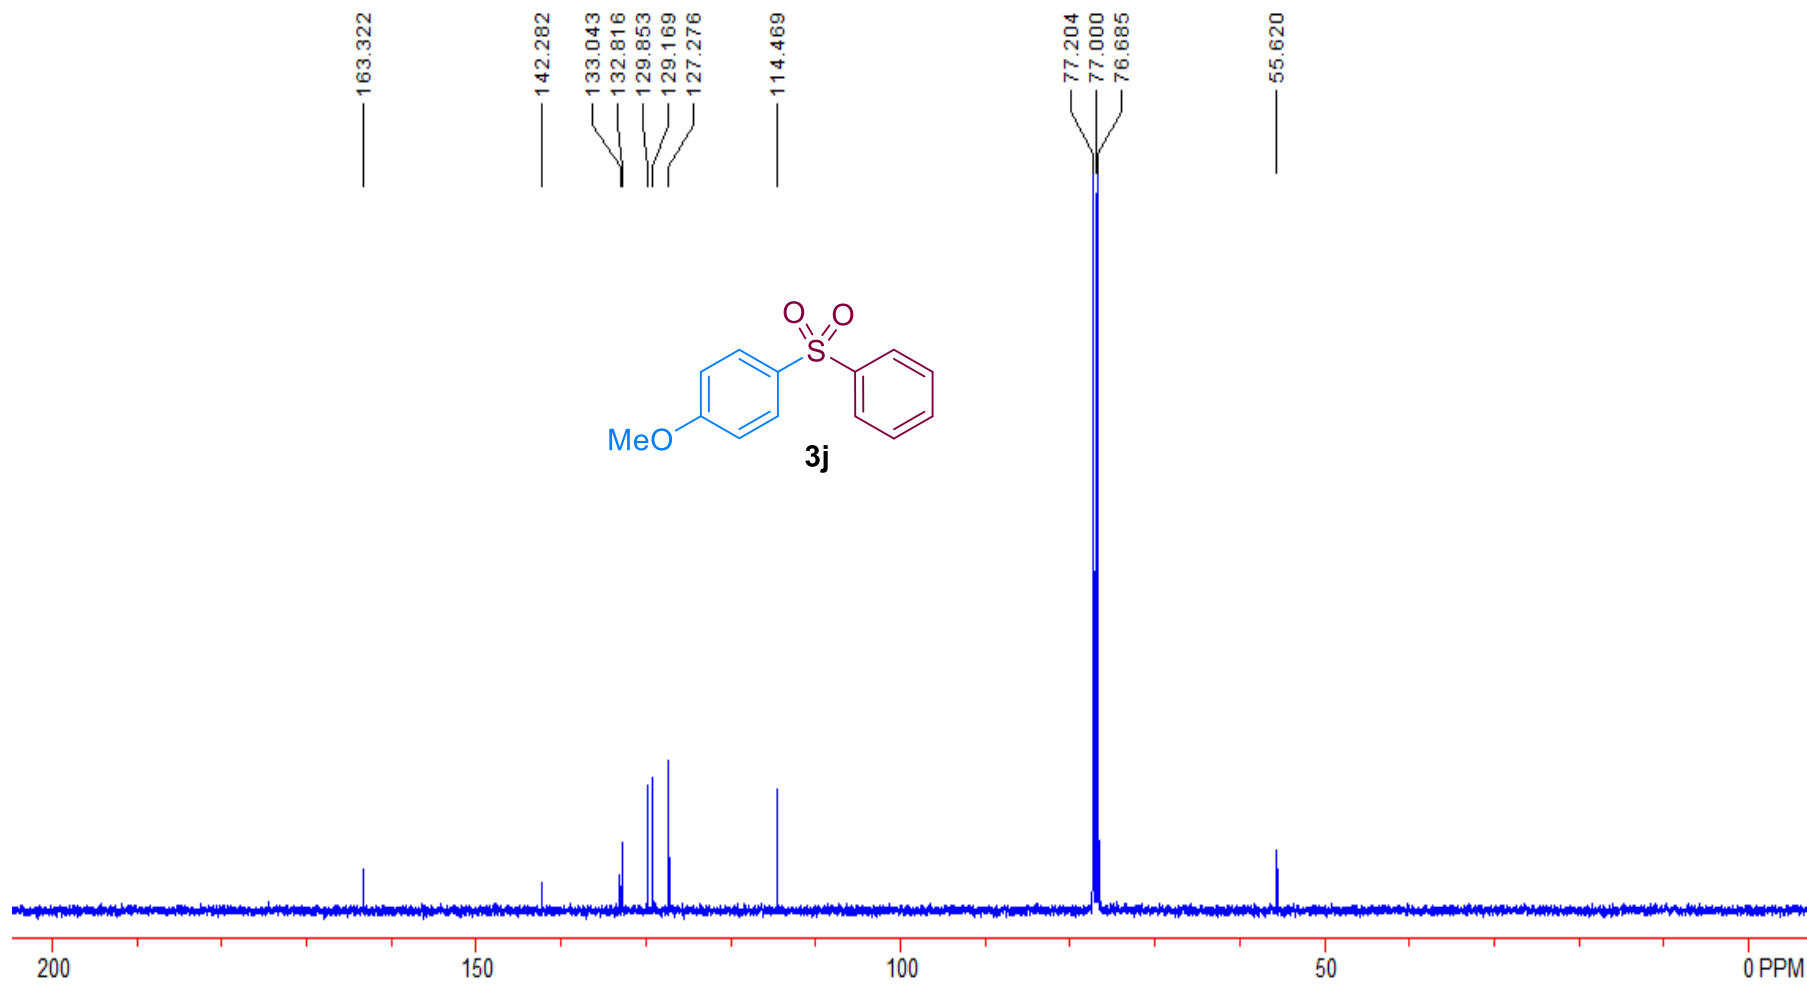

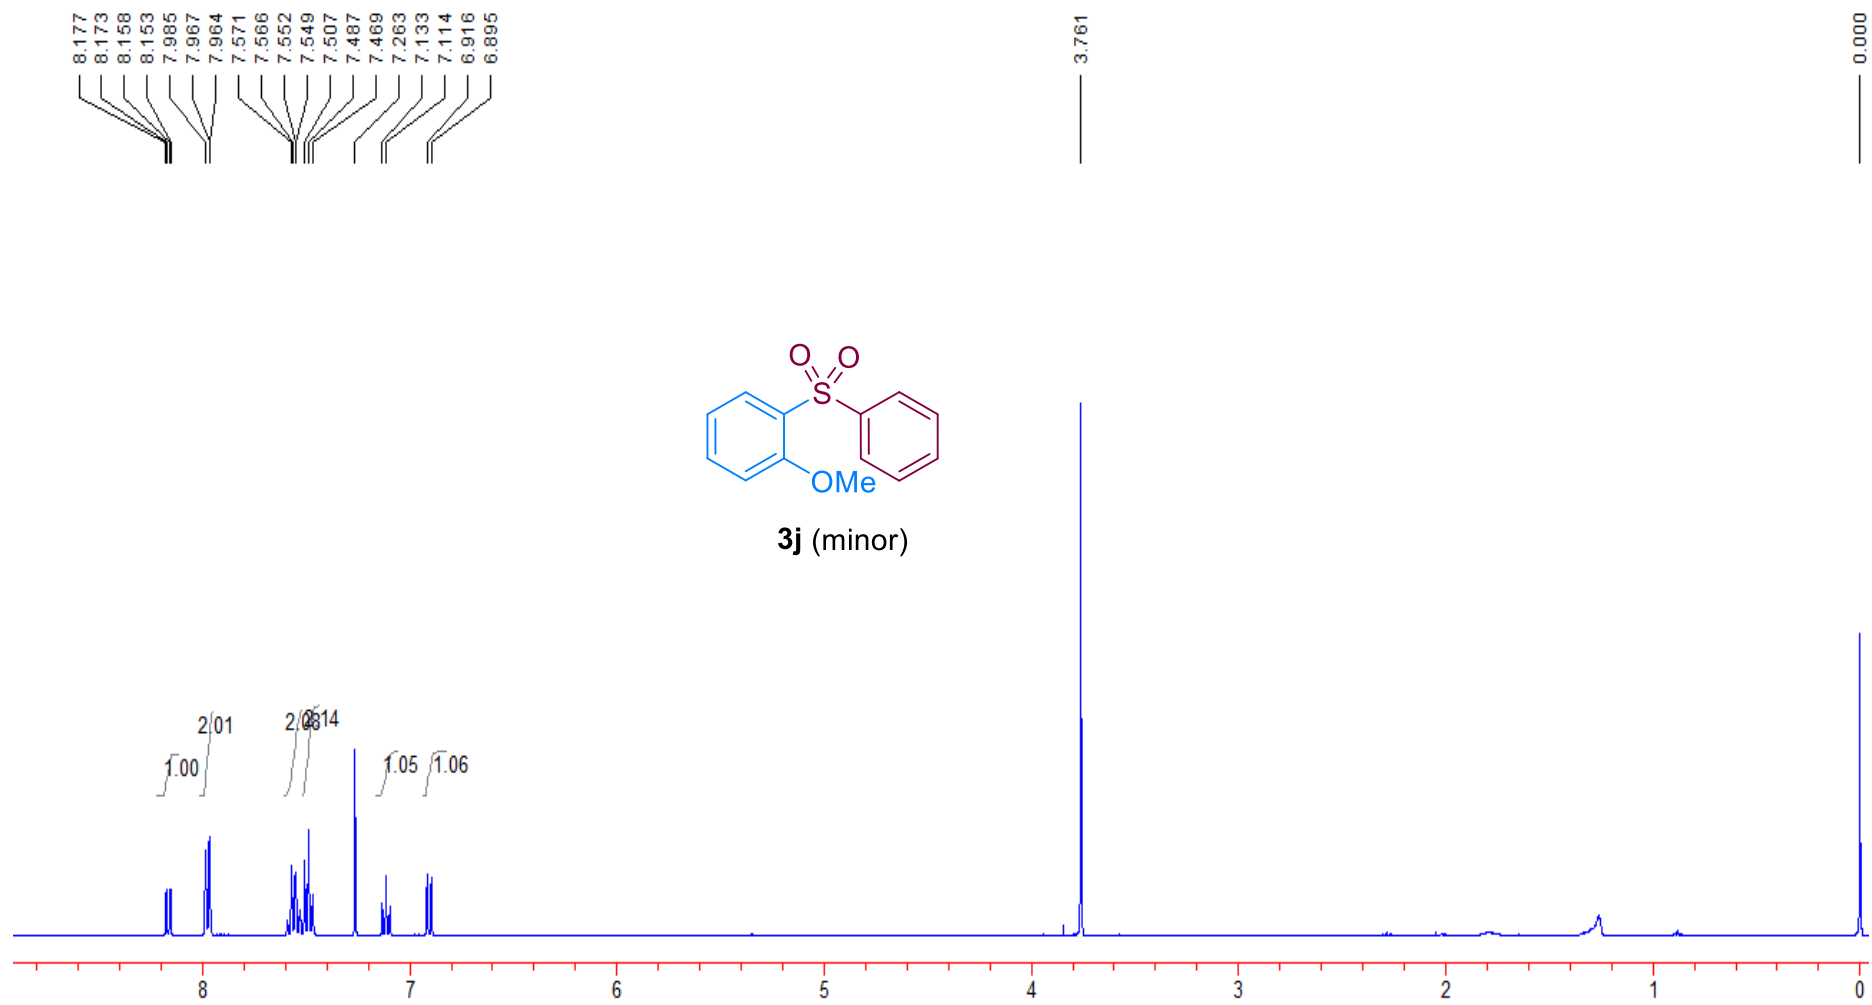

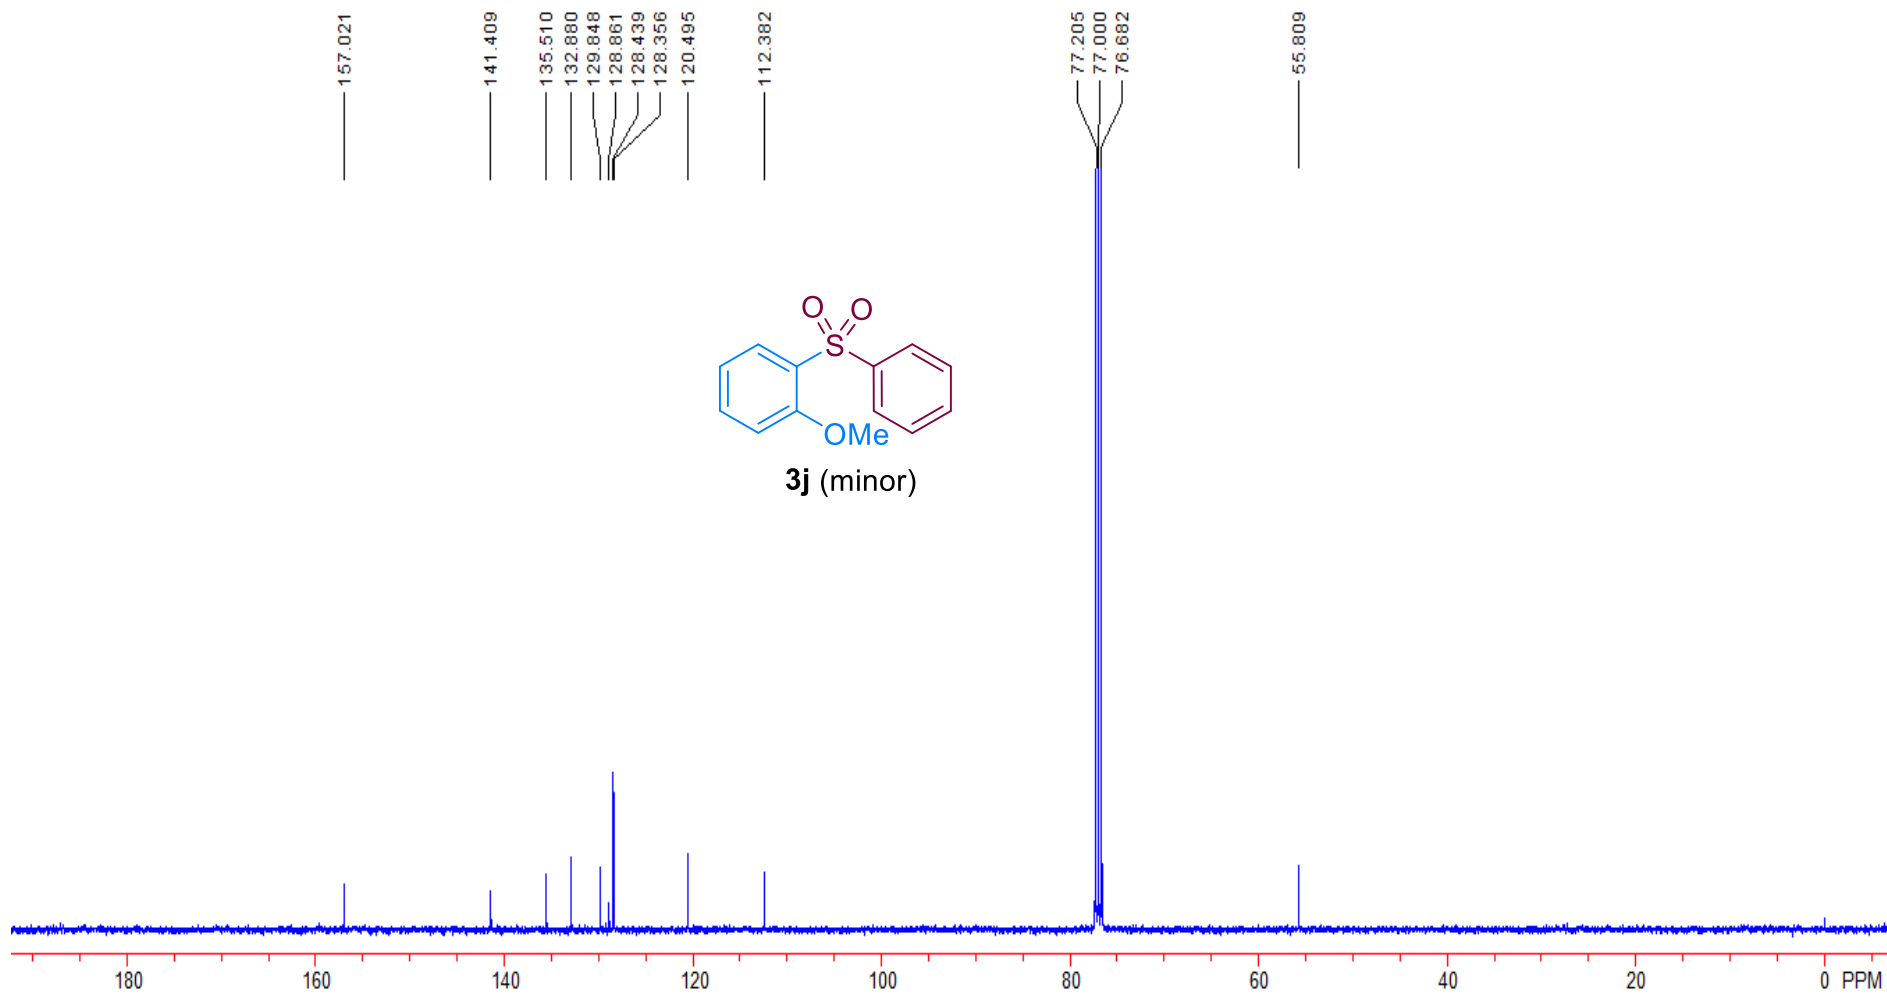

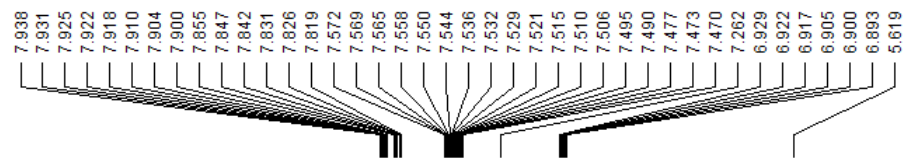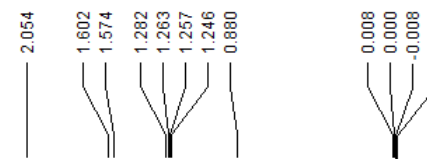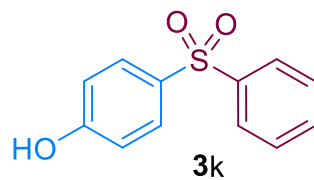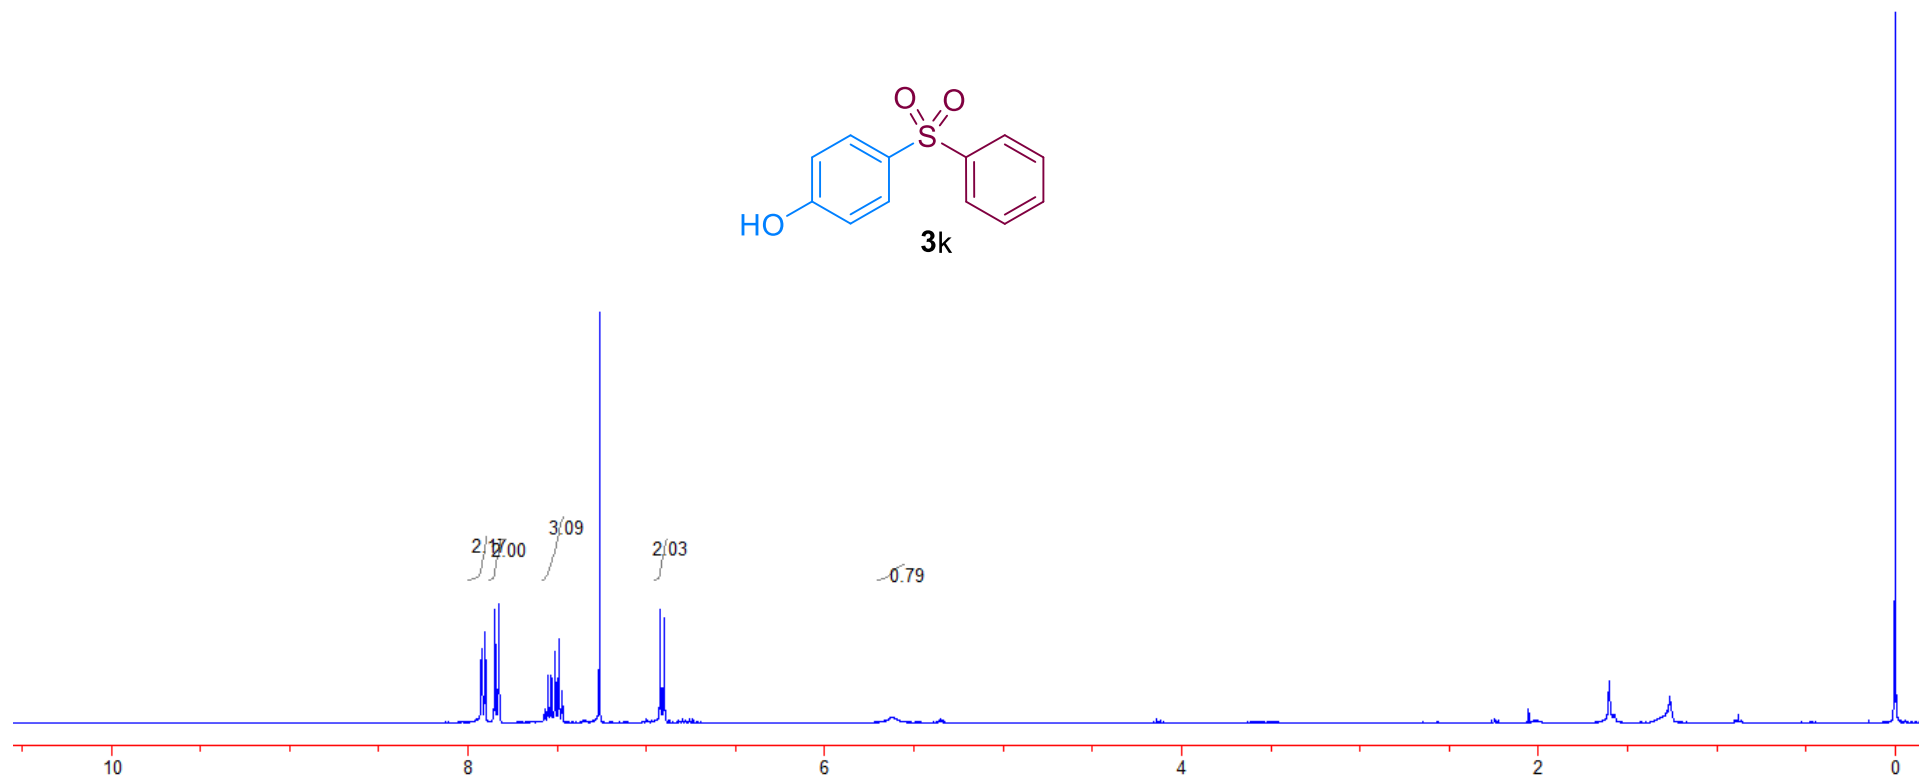

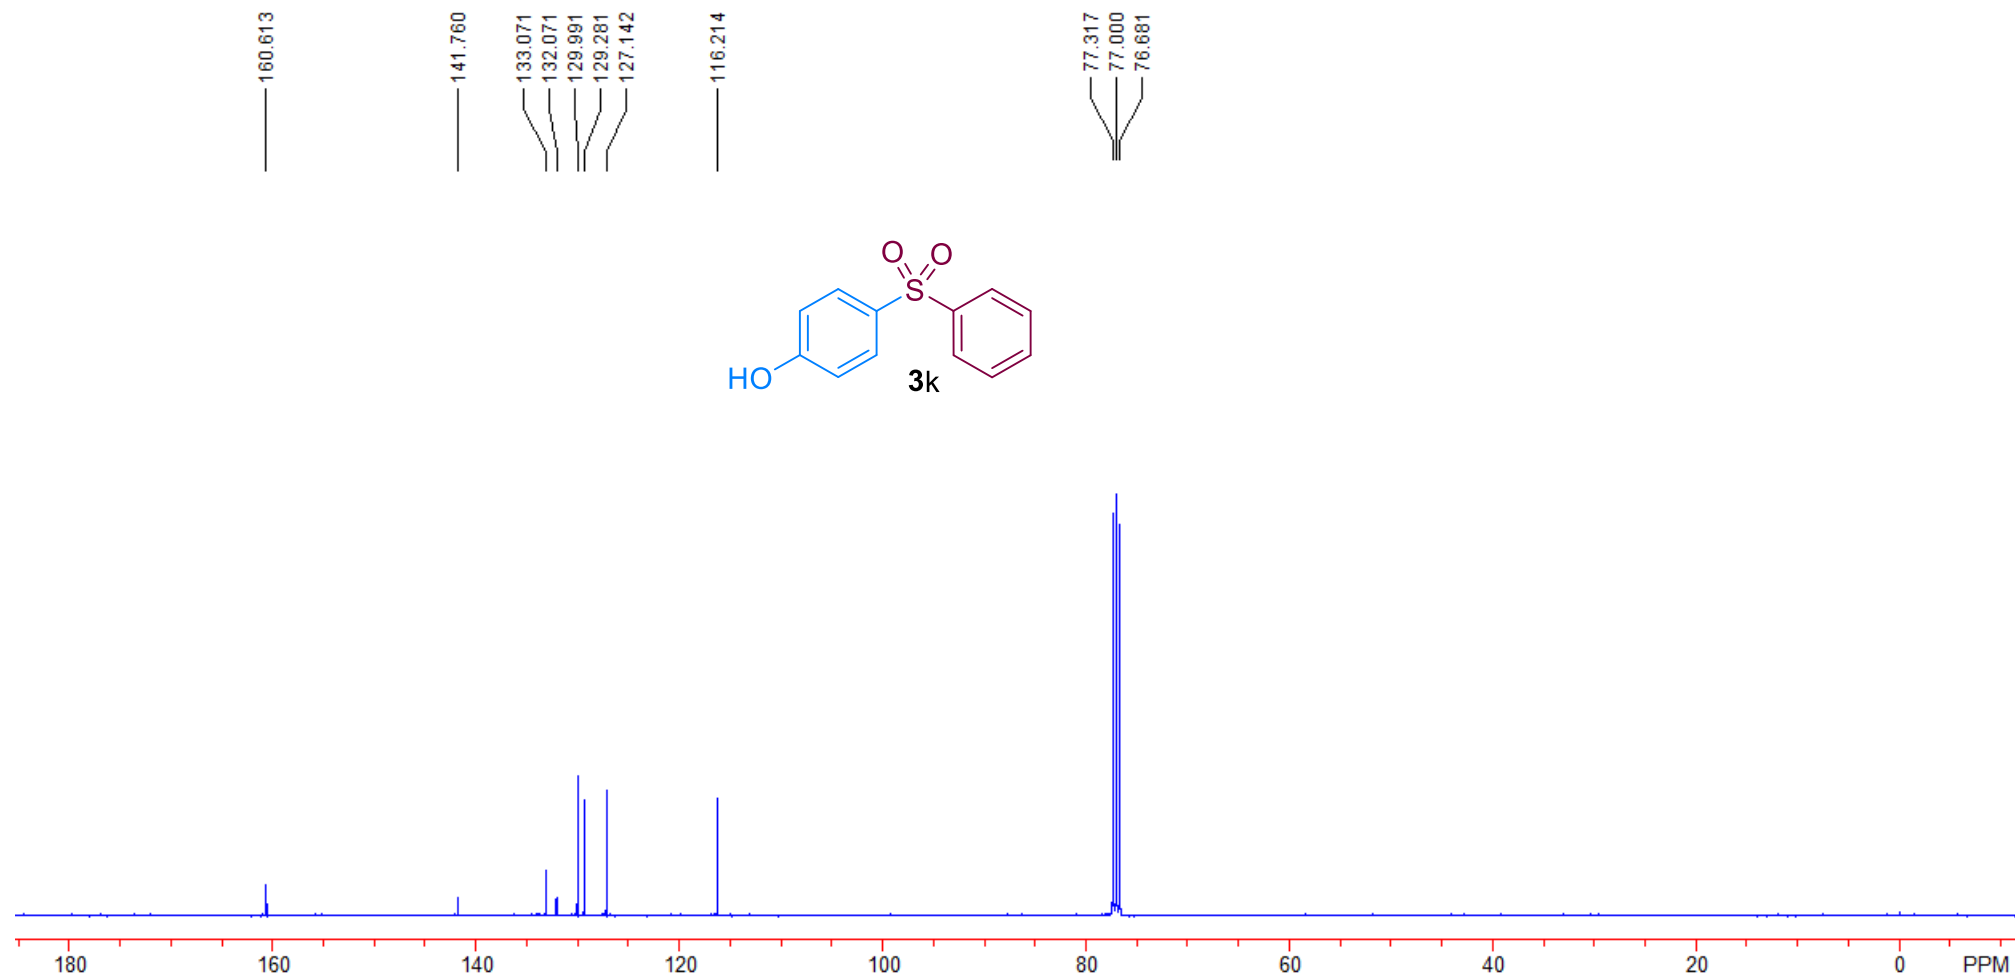



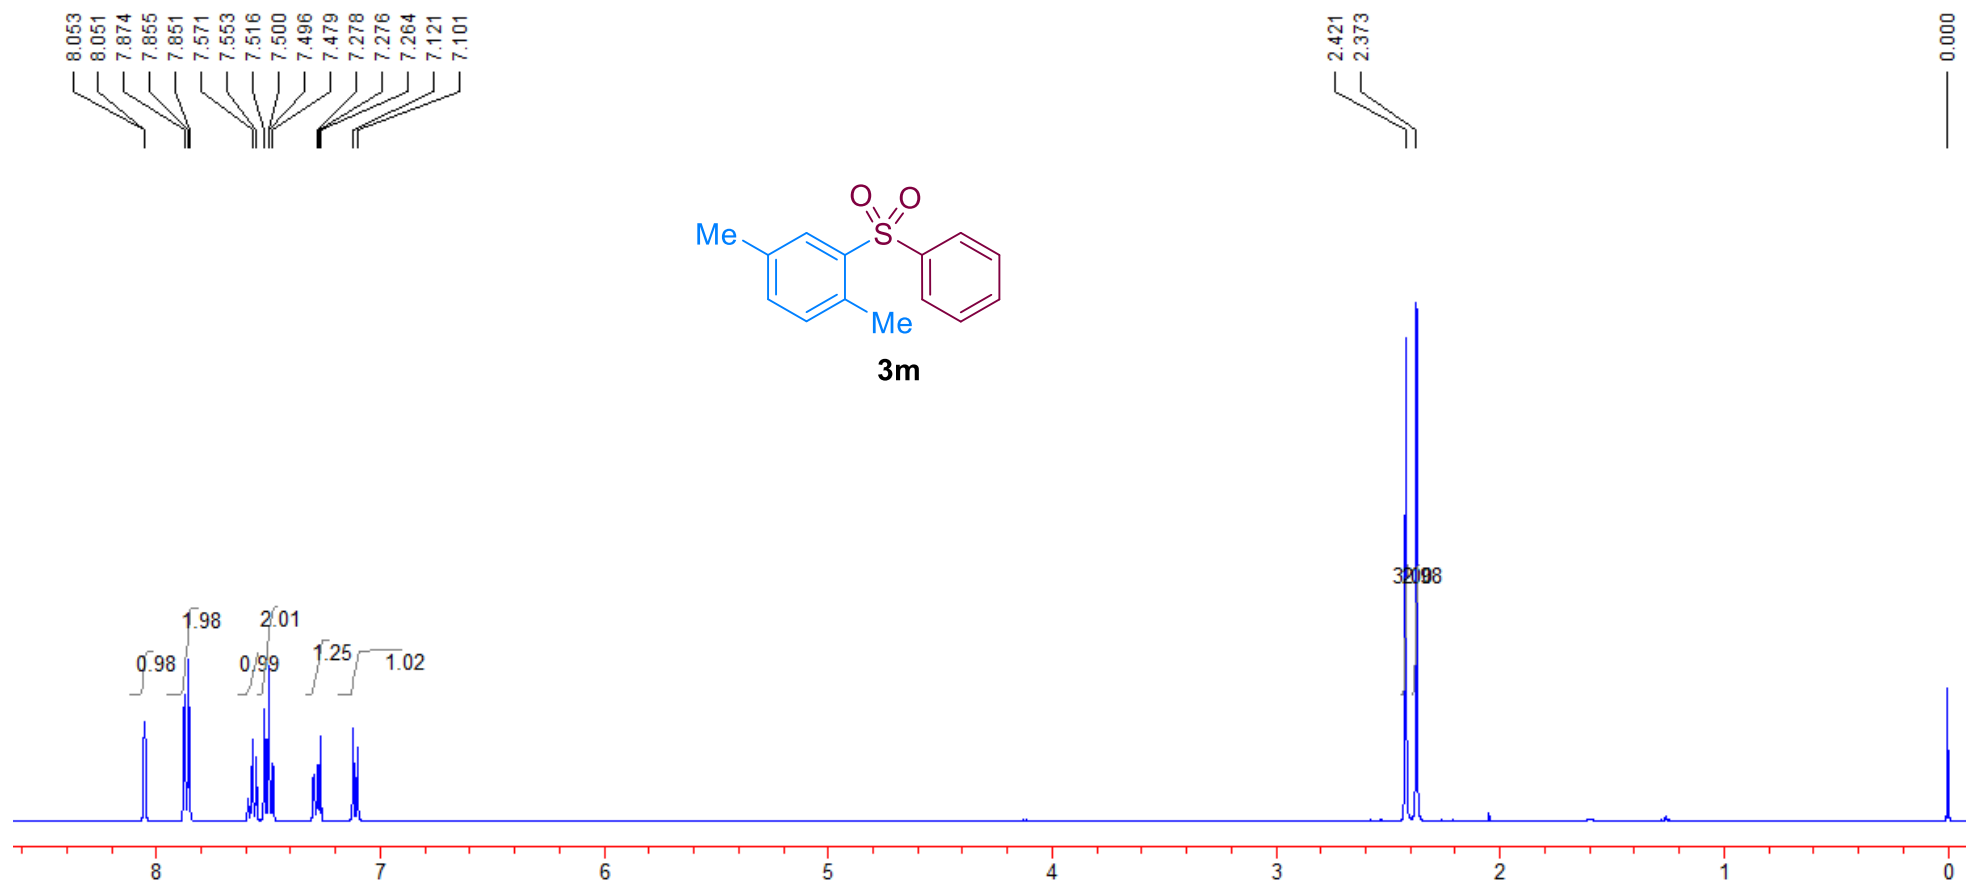

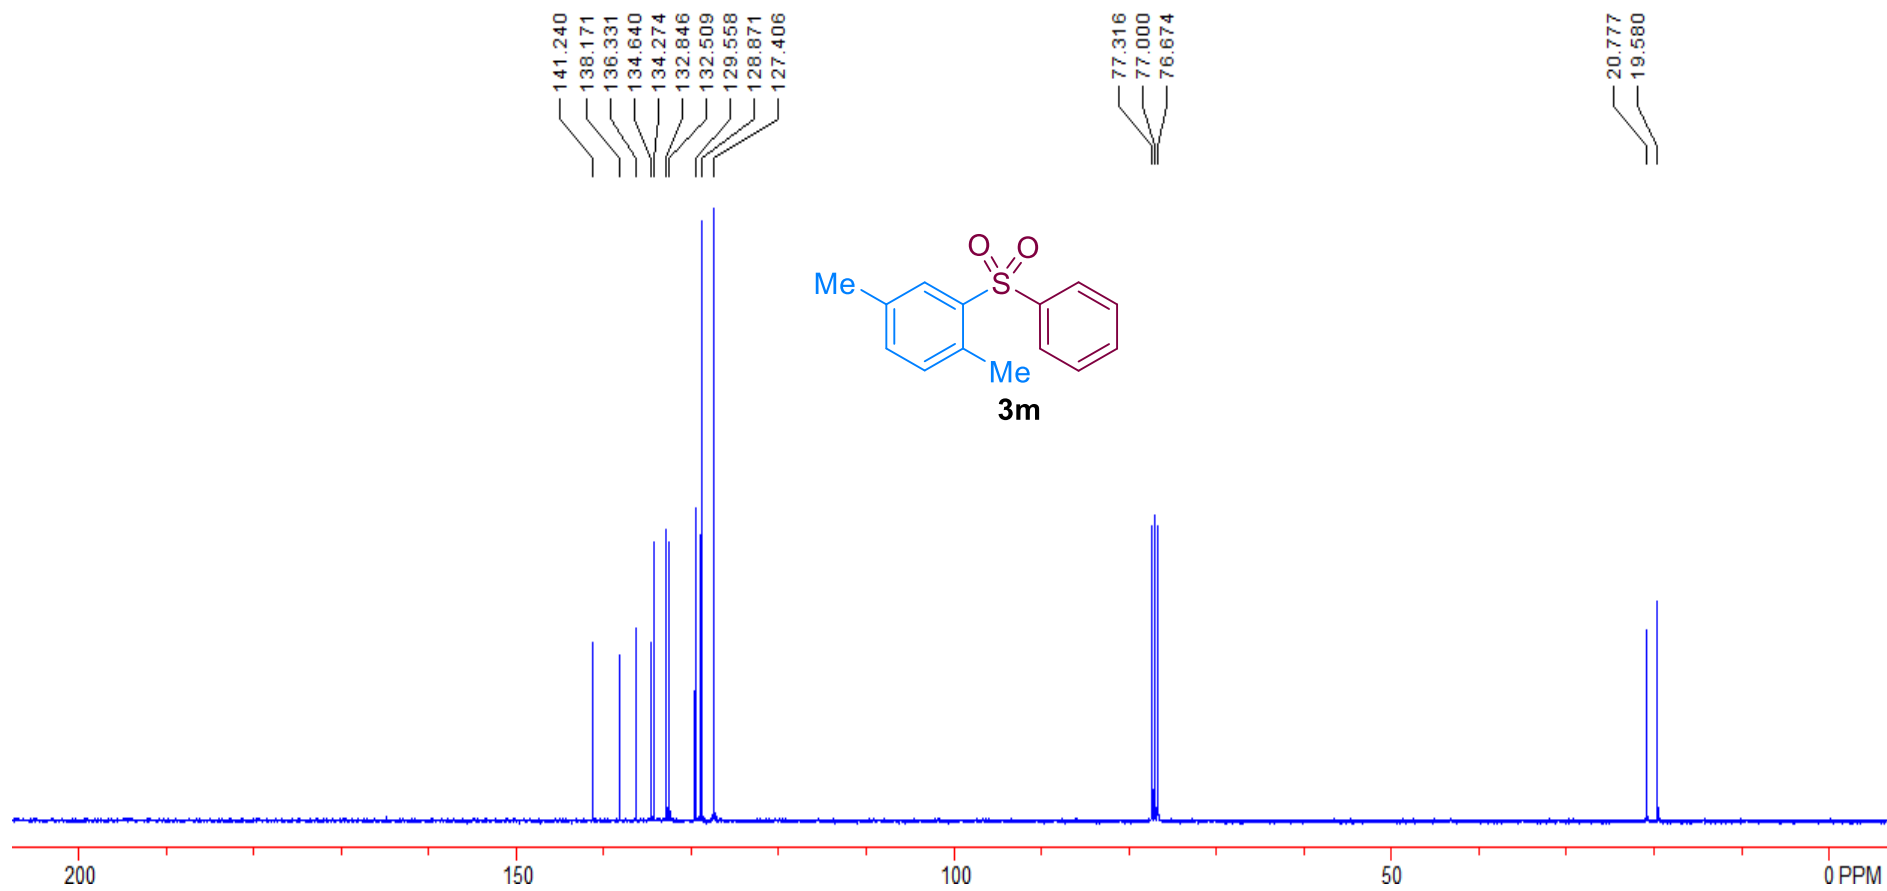

8.224  
8.219  
7.888  
7.870  
7.866  
7.611  
7.593  
7.550  
7.533  
7.530  
7.512  
7.460  
7.454  
7.440  
7.434  
7.263  
7.183  
7.163

2.401

0.000

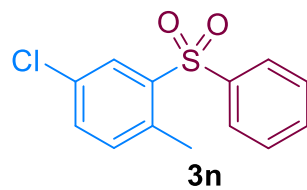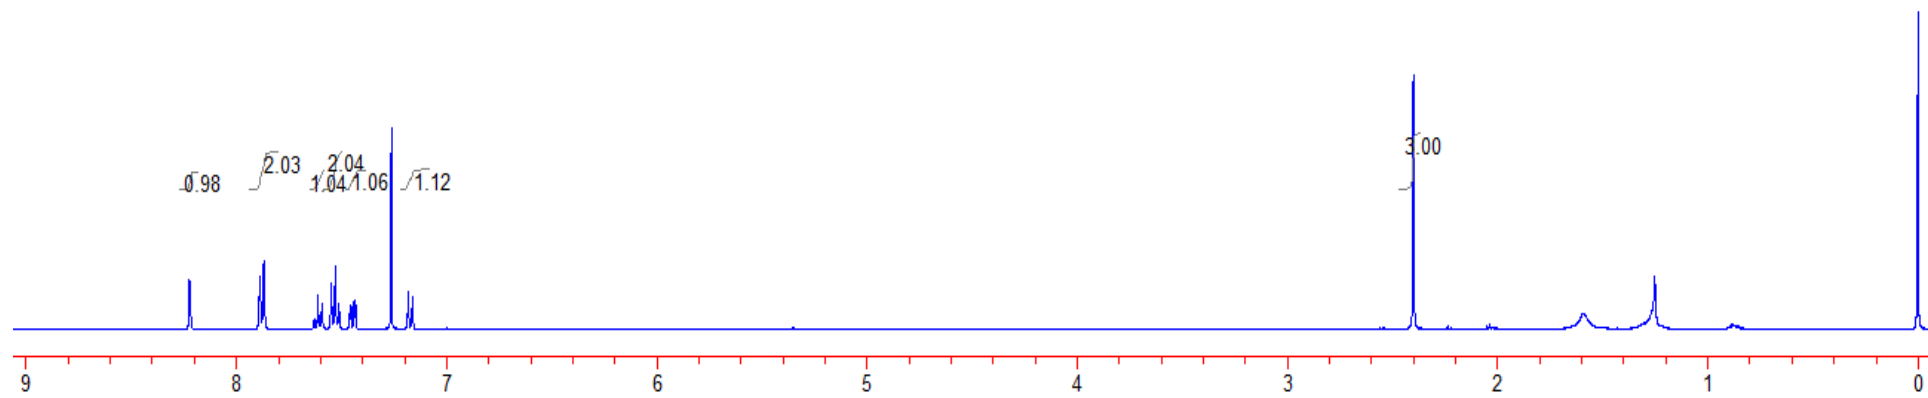

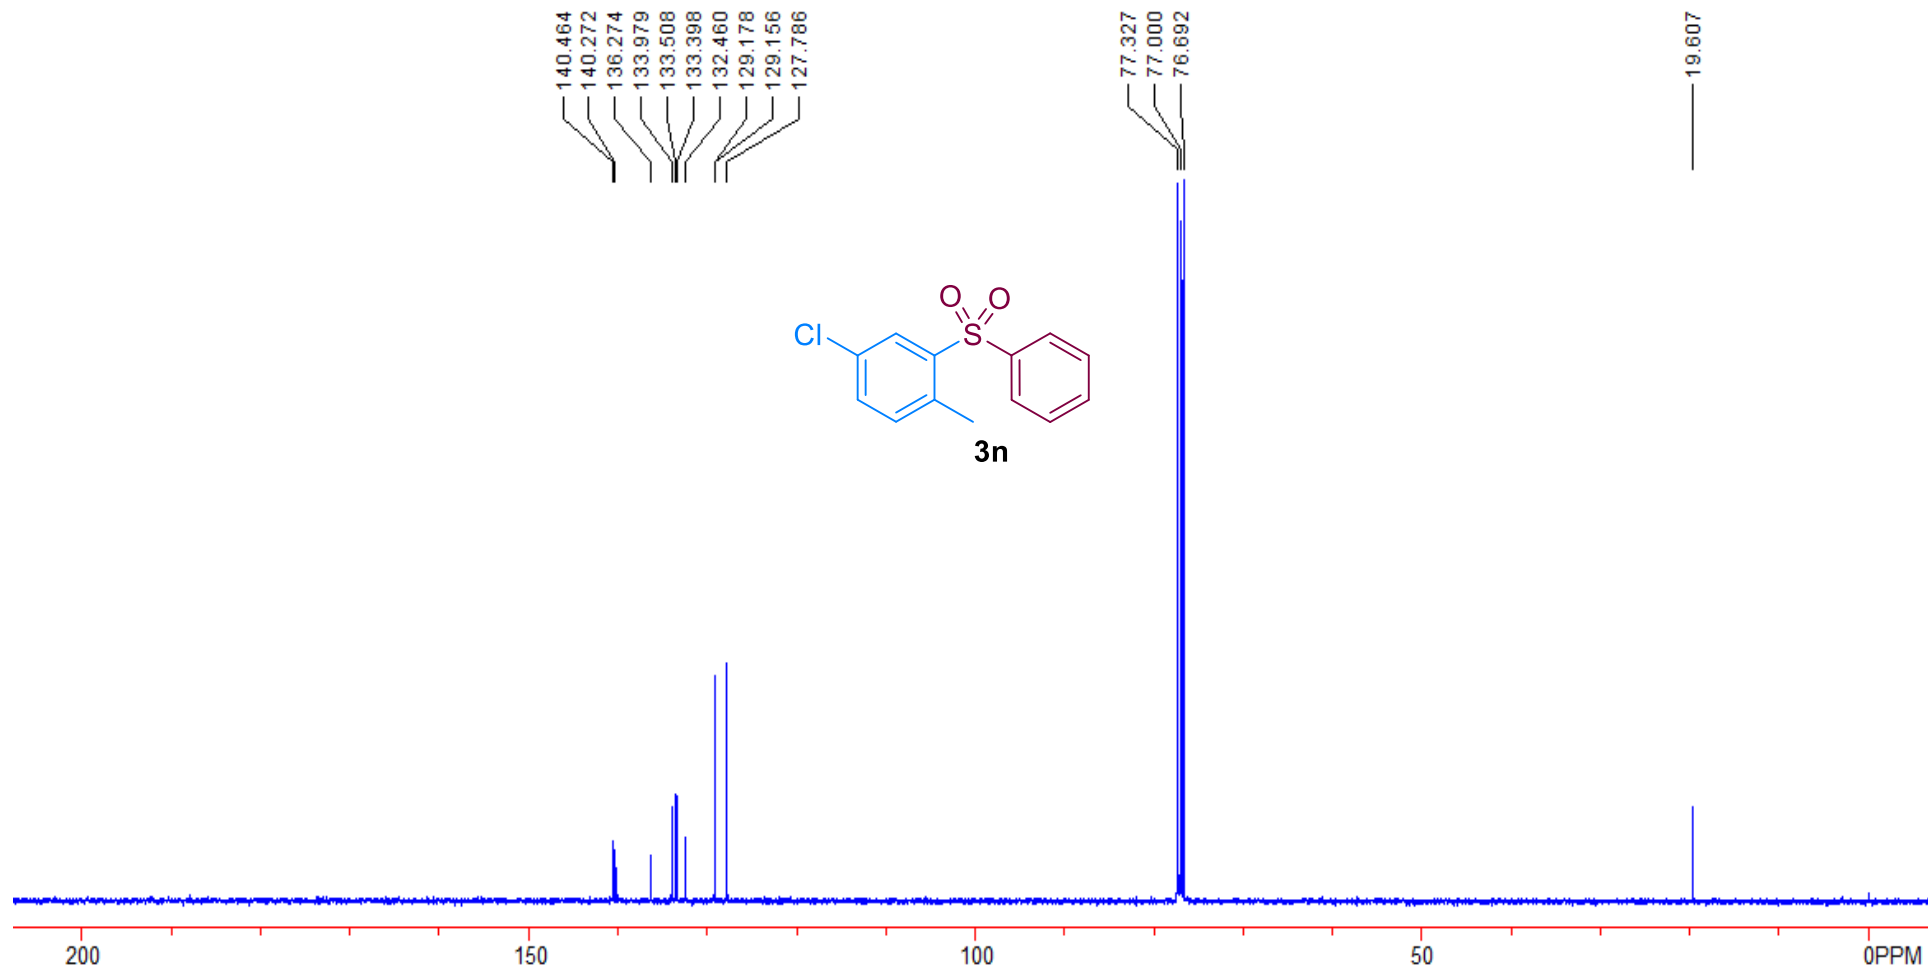

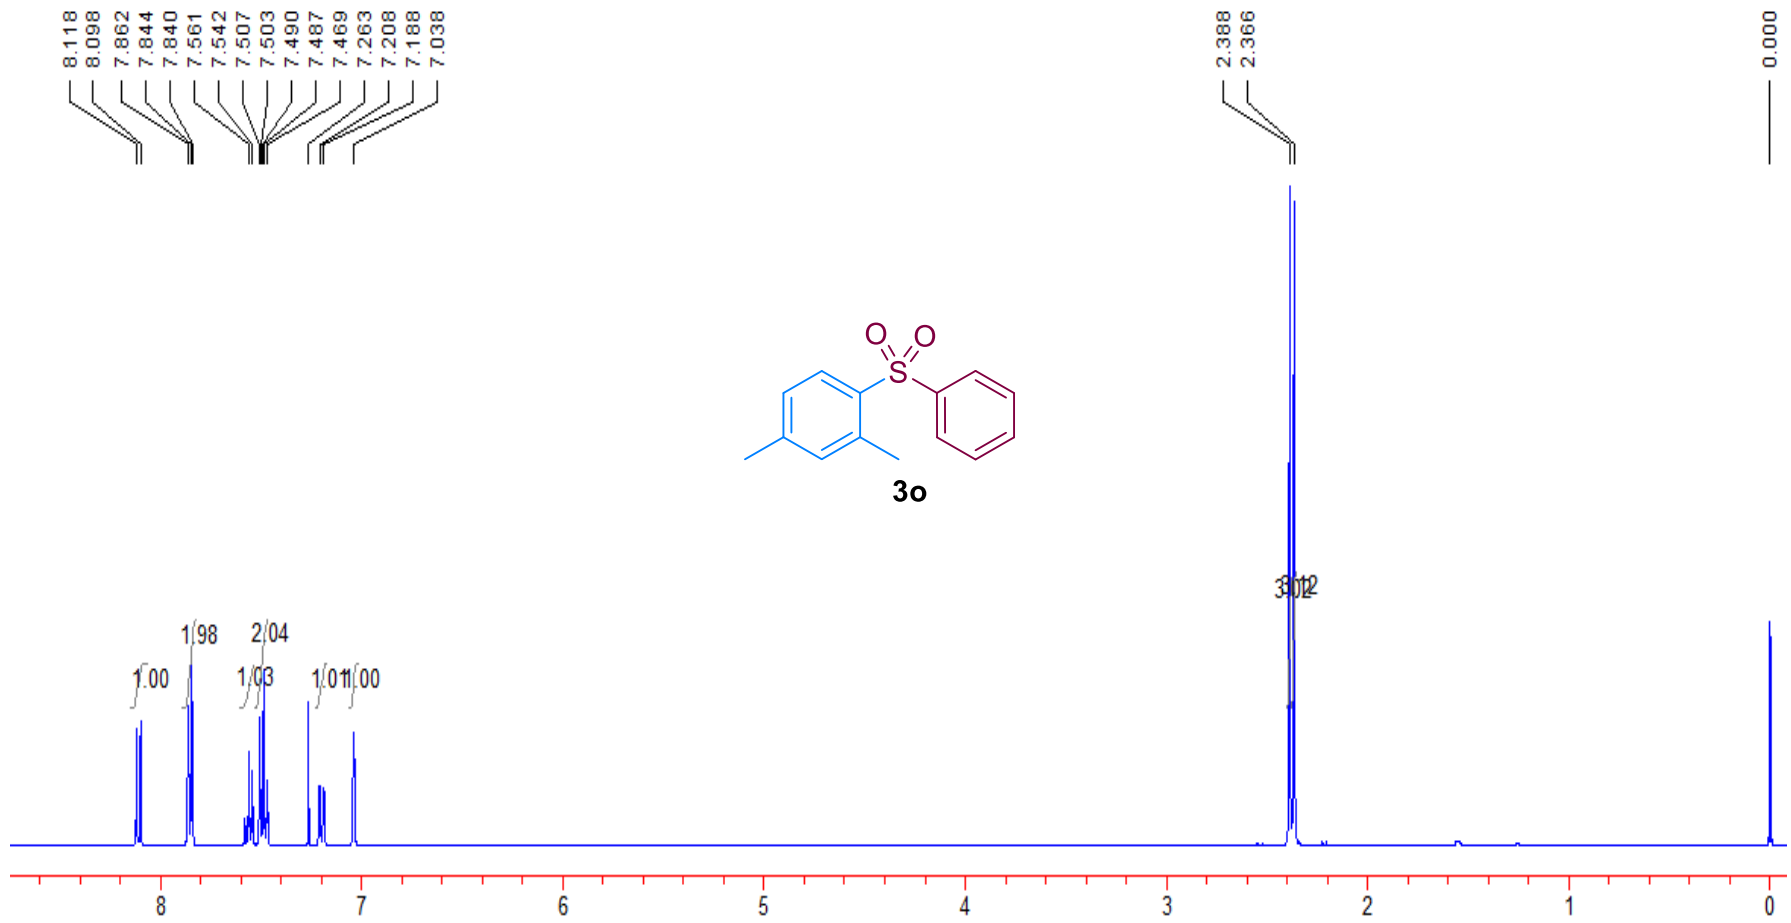

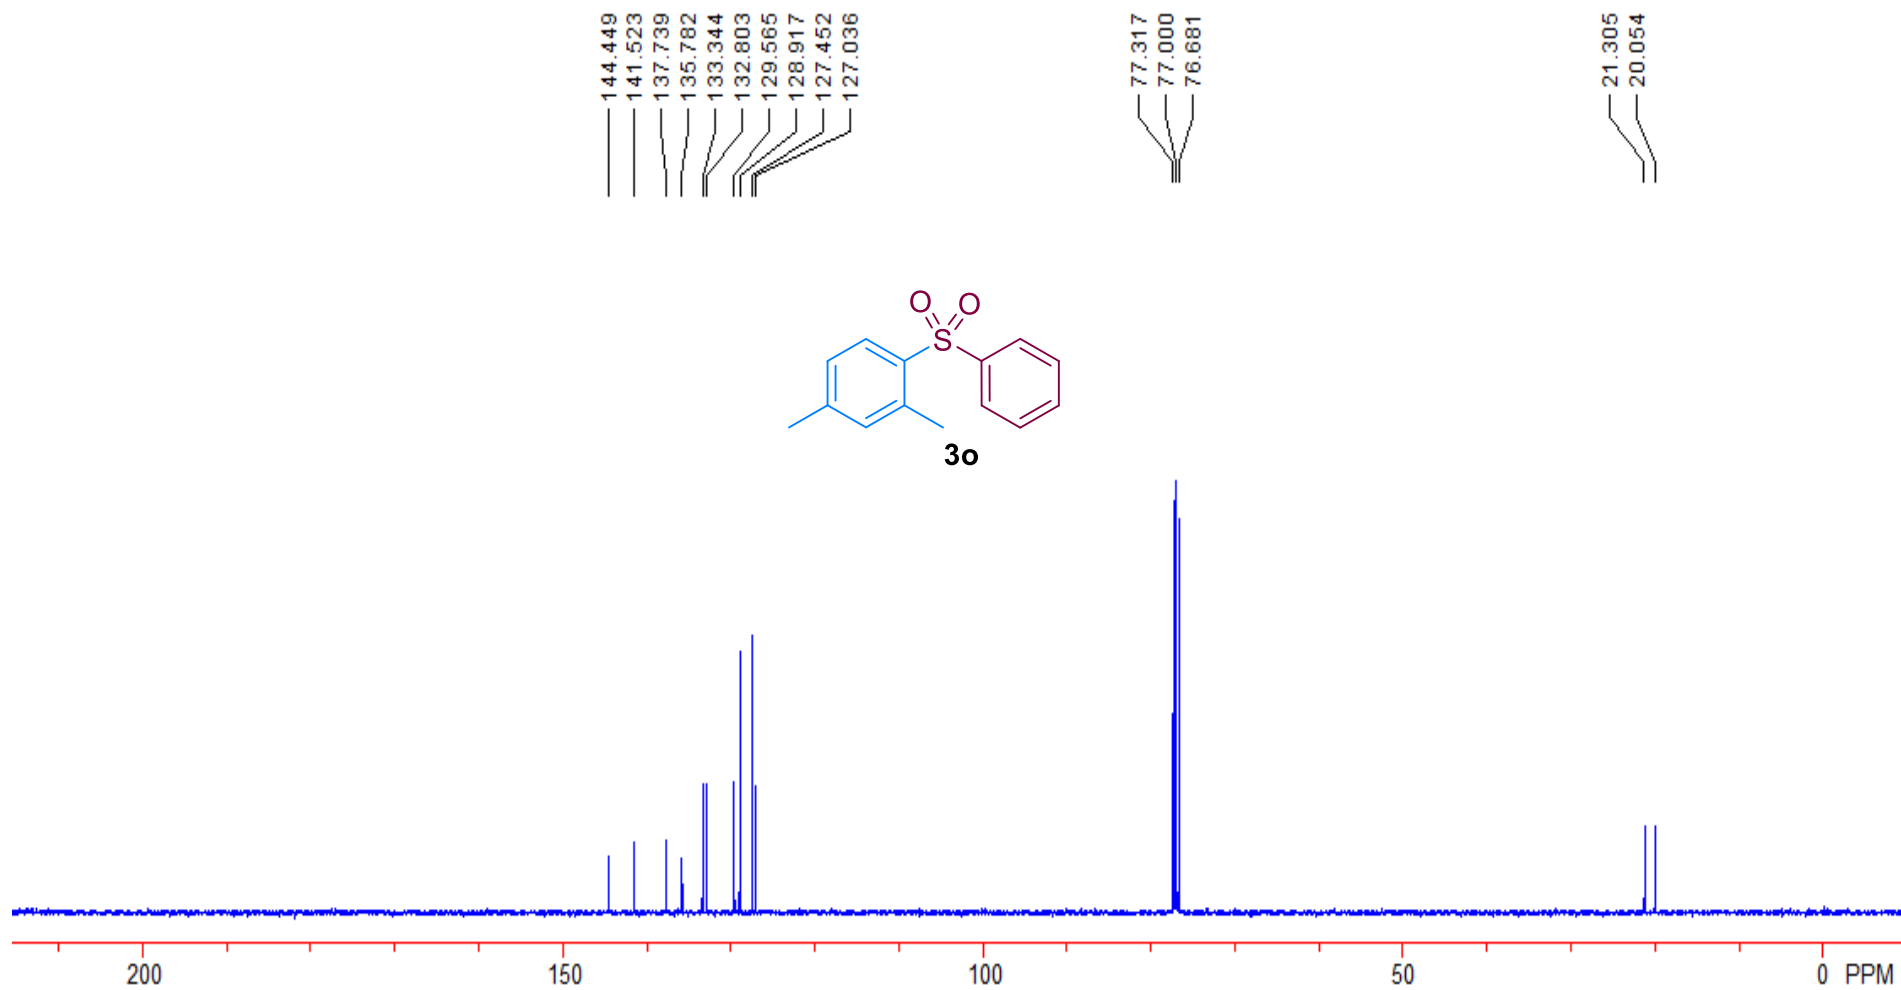

8.316  
8.294  
7.950  
7.936  
7.932  
7.928  
7.629  
7.610  
7.548  
7.528  
7.510  
7.491  
7.486  
7.470  
7.465  
7.450  
7.445  
7.265

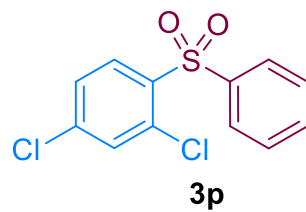

0.000

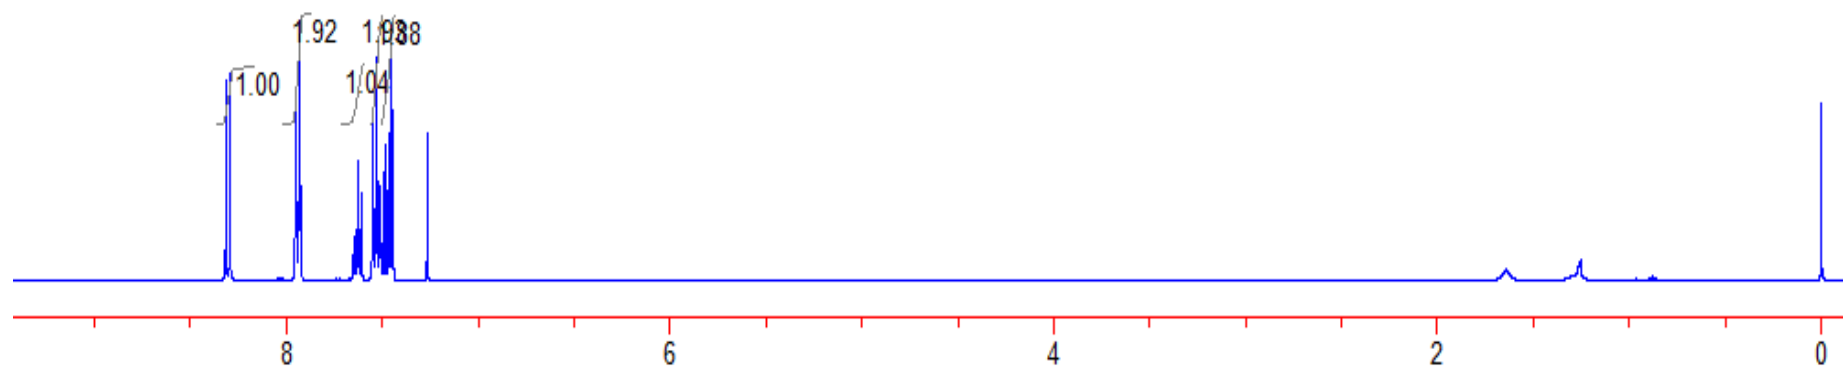

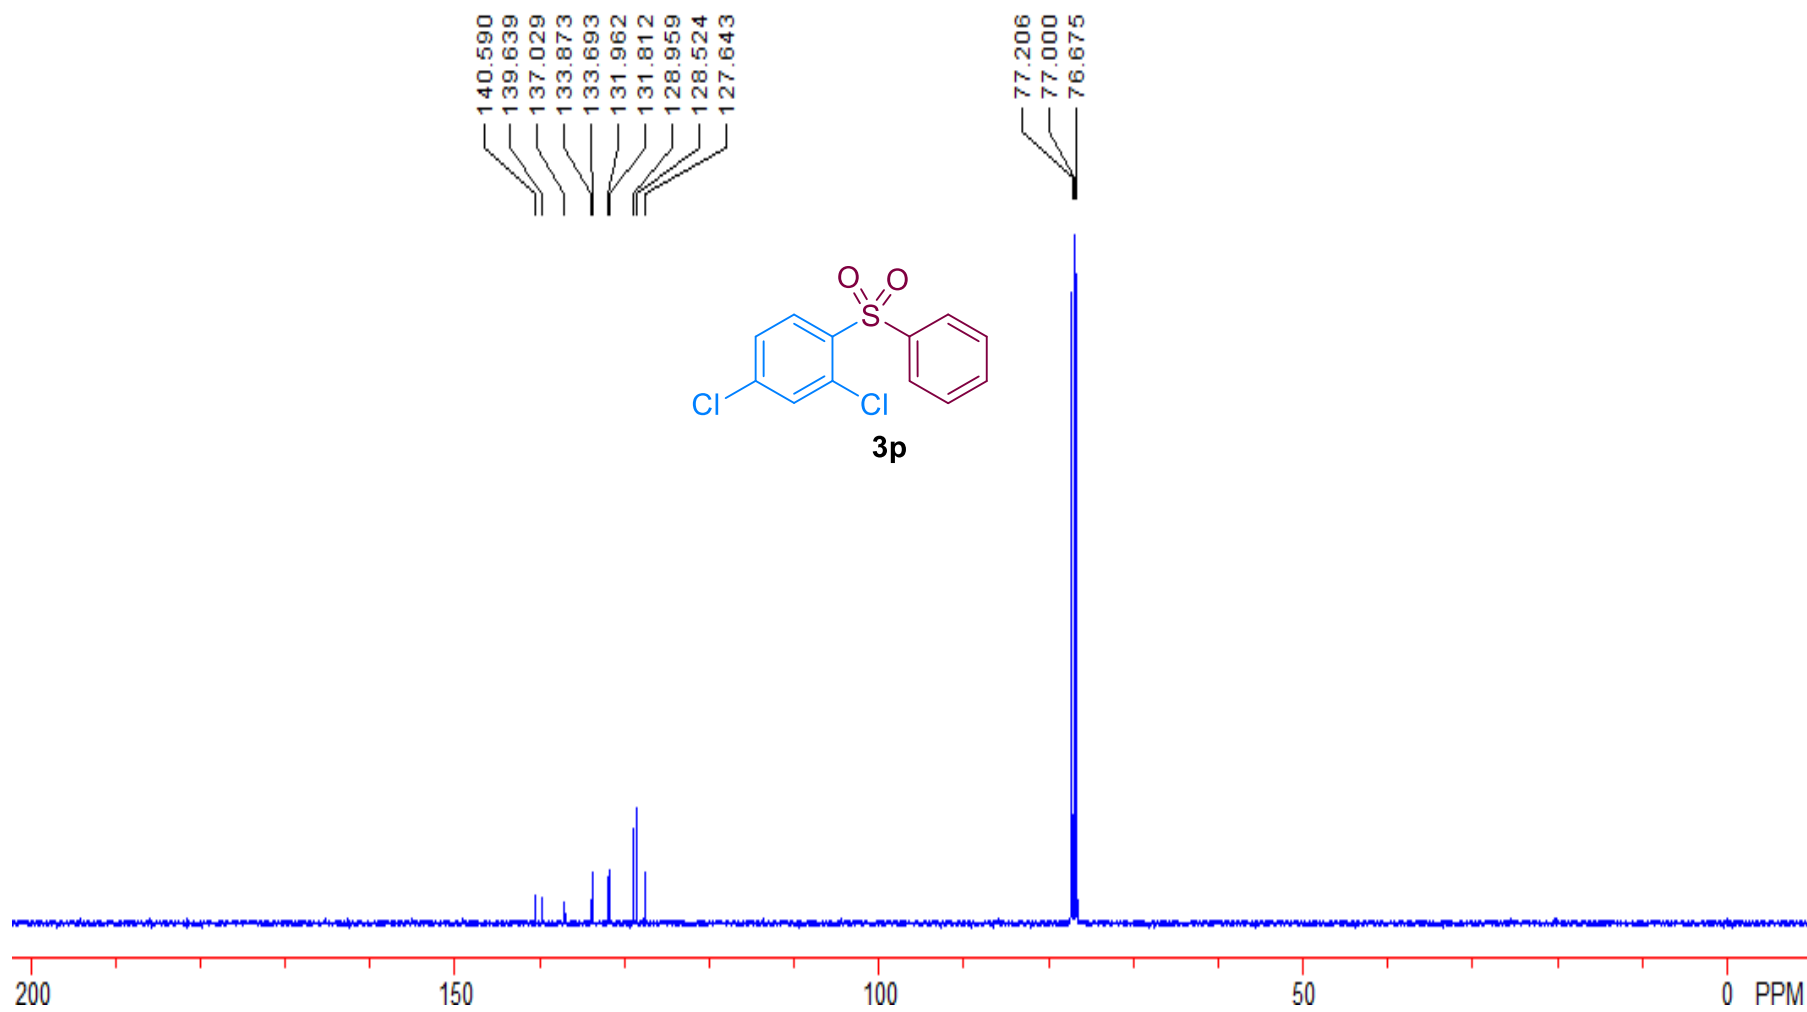



7.945  
7.931  
7.927  
7.923  
7.812  
7.806  
7.719  
7.713  
7.698  
7.693  
7.585  
7.570  
7.566  
7.563  
7.537  
7.520  
7.517  
7.499  
7.497  
7.475  
7.454  
7.264

2.418  
2.412

-0.000

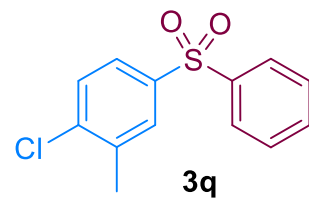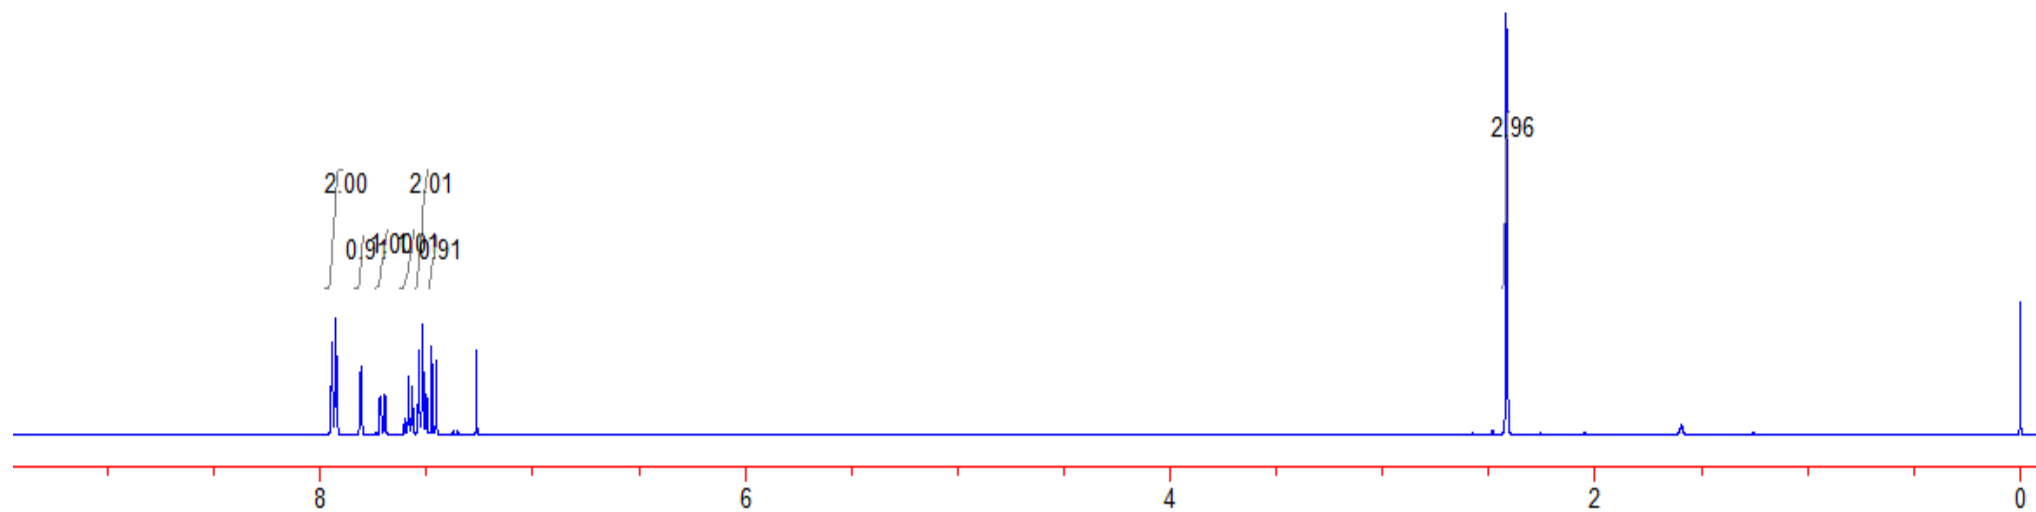

141.264  
139.940  
139.780  
137.733  
133.278  
129.942  
129.747  
129.309  
127.560  
127.510  
126.297

77.326  
77.000  
76.690

20.155

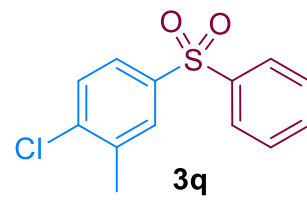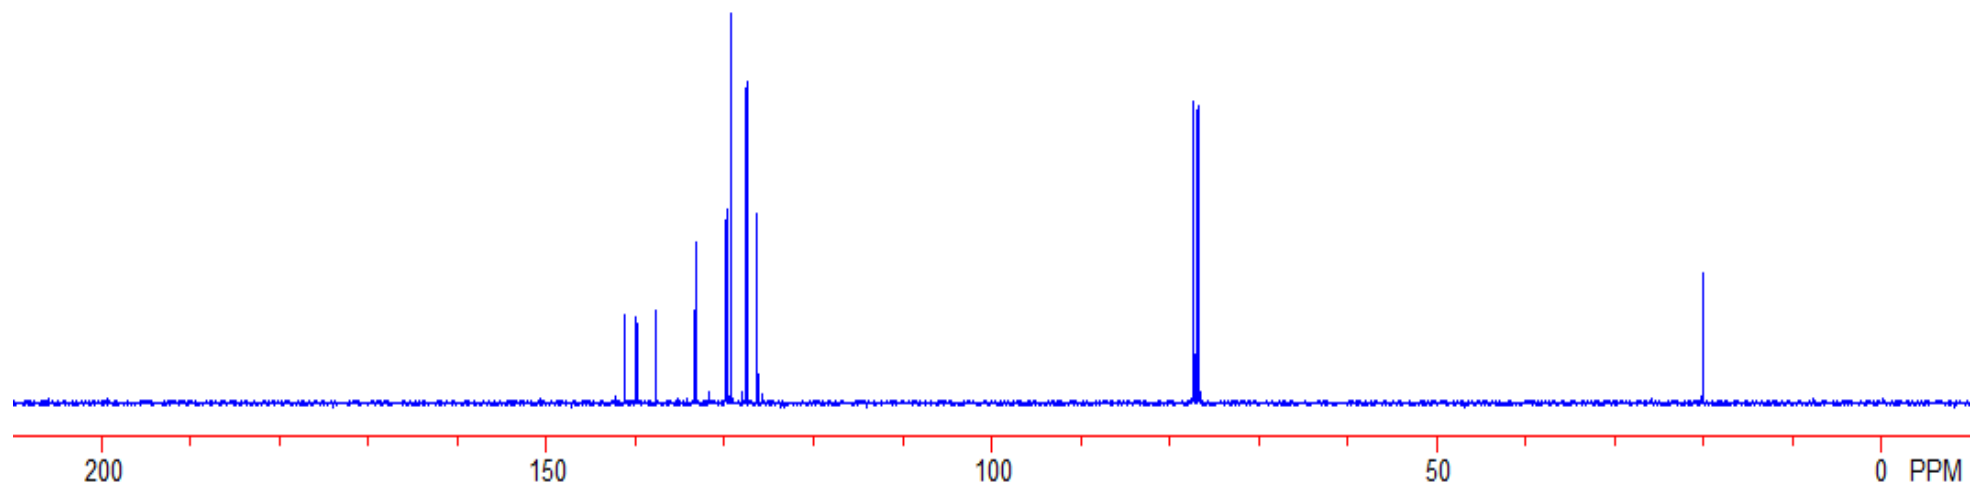

7.959  
7.954  
7.951  
7.946  
7.938  
7.933  
7.929  
7.818  
7.813  
7.724  
7.719  
7.703  
7.702  
7.698  
7.697  
7.594  
7.576  
7.570  
7.561  
7.557  
7.554  
7.530  
7.527  
7.515  
7.510  
7.497  
7.493  
7.490  
7.463  
7.442  
7.277

2.402

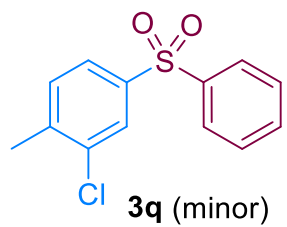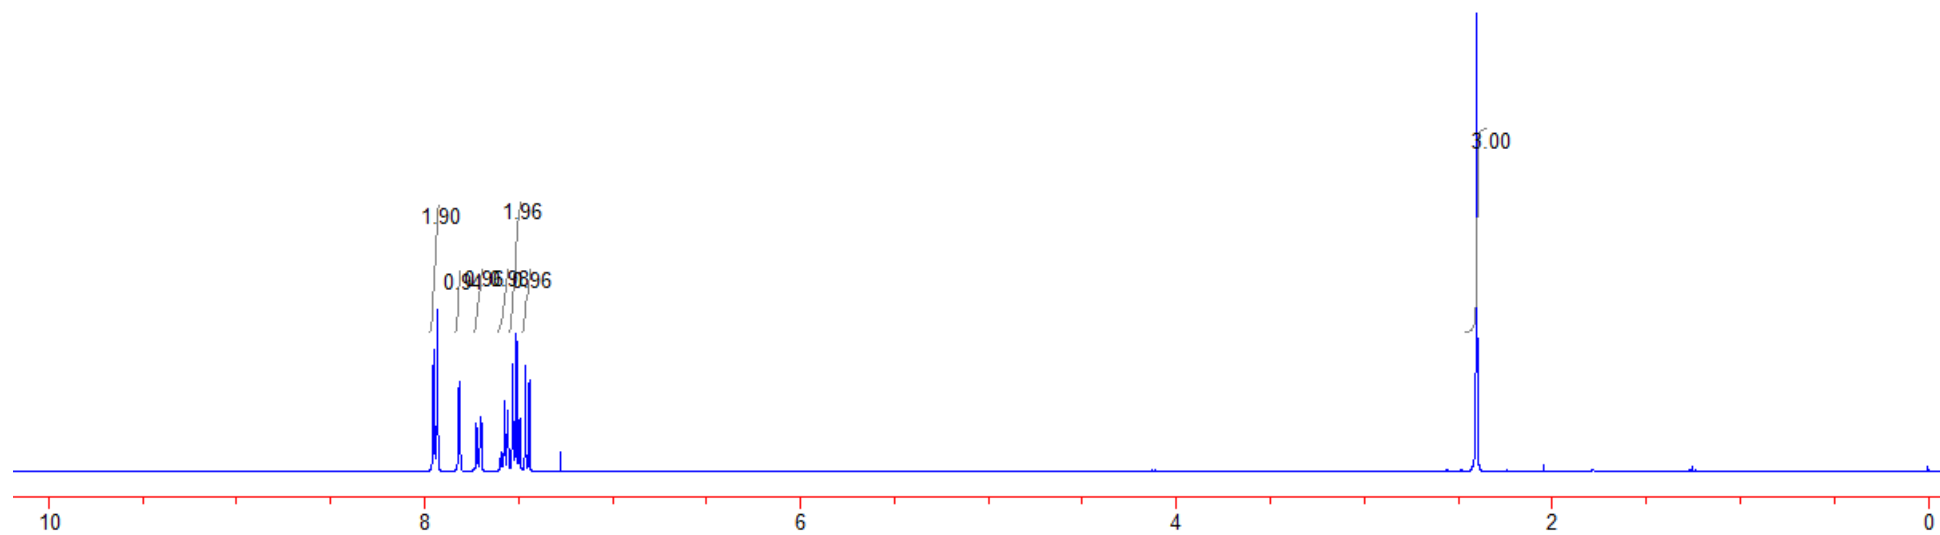

141.202  
139.909  
139.736  
137.716  
133.275  
129.913  
129.717  
129.292  
127.487  
126.269

77.326  
77.000  
76.690

20.136

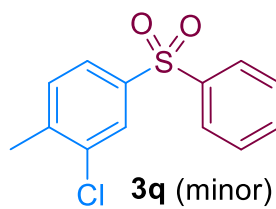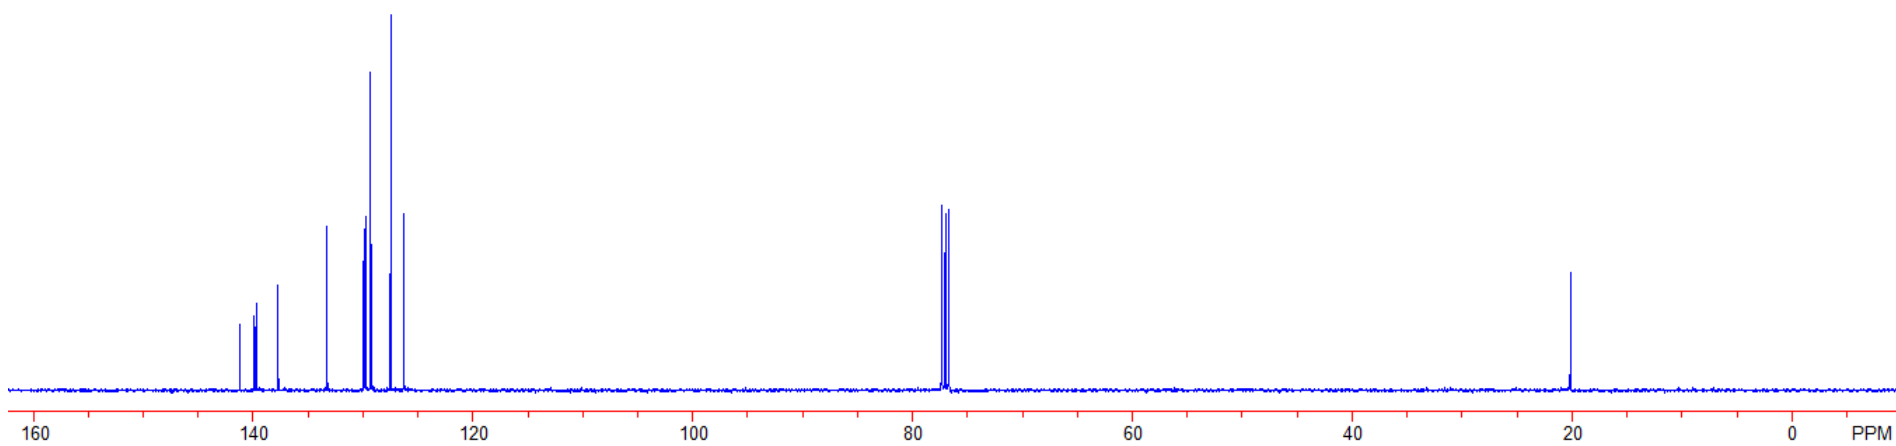

7.795  
7.777  
7.774  
7.540  
7.487  
7.471  
7.467  
7.261  
6.943

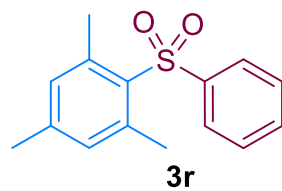

2.592  
2.297

-0.000

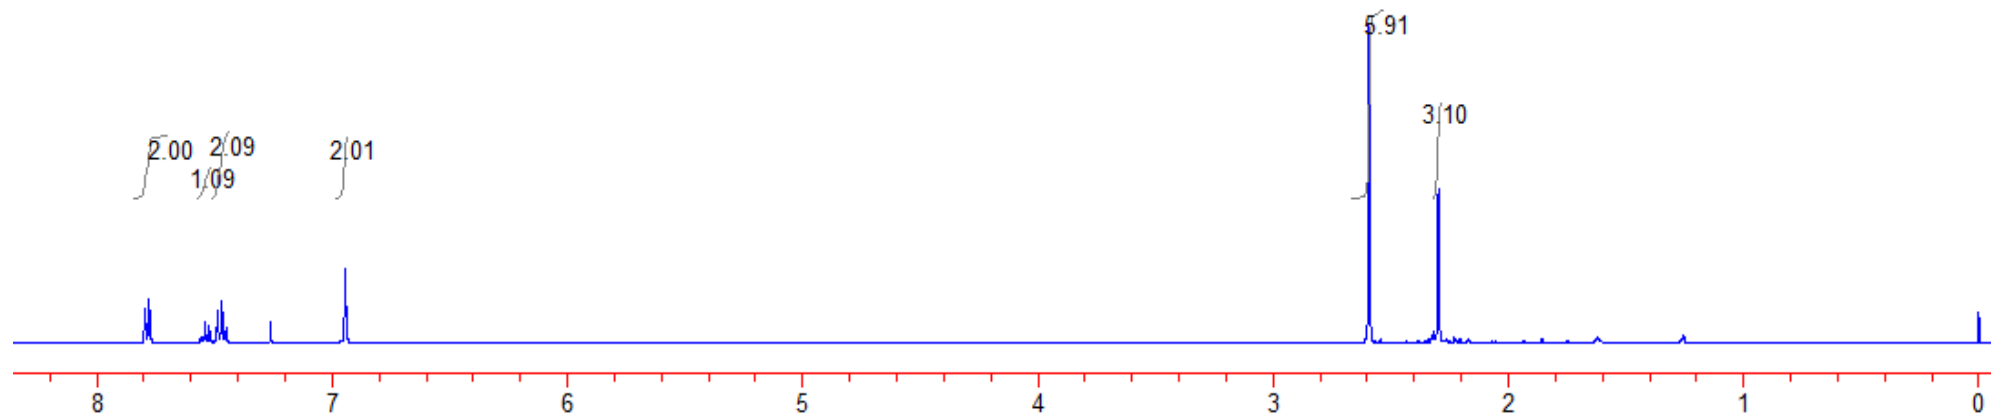

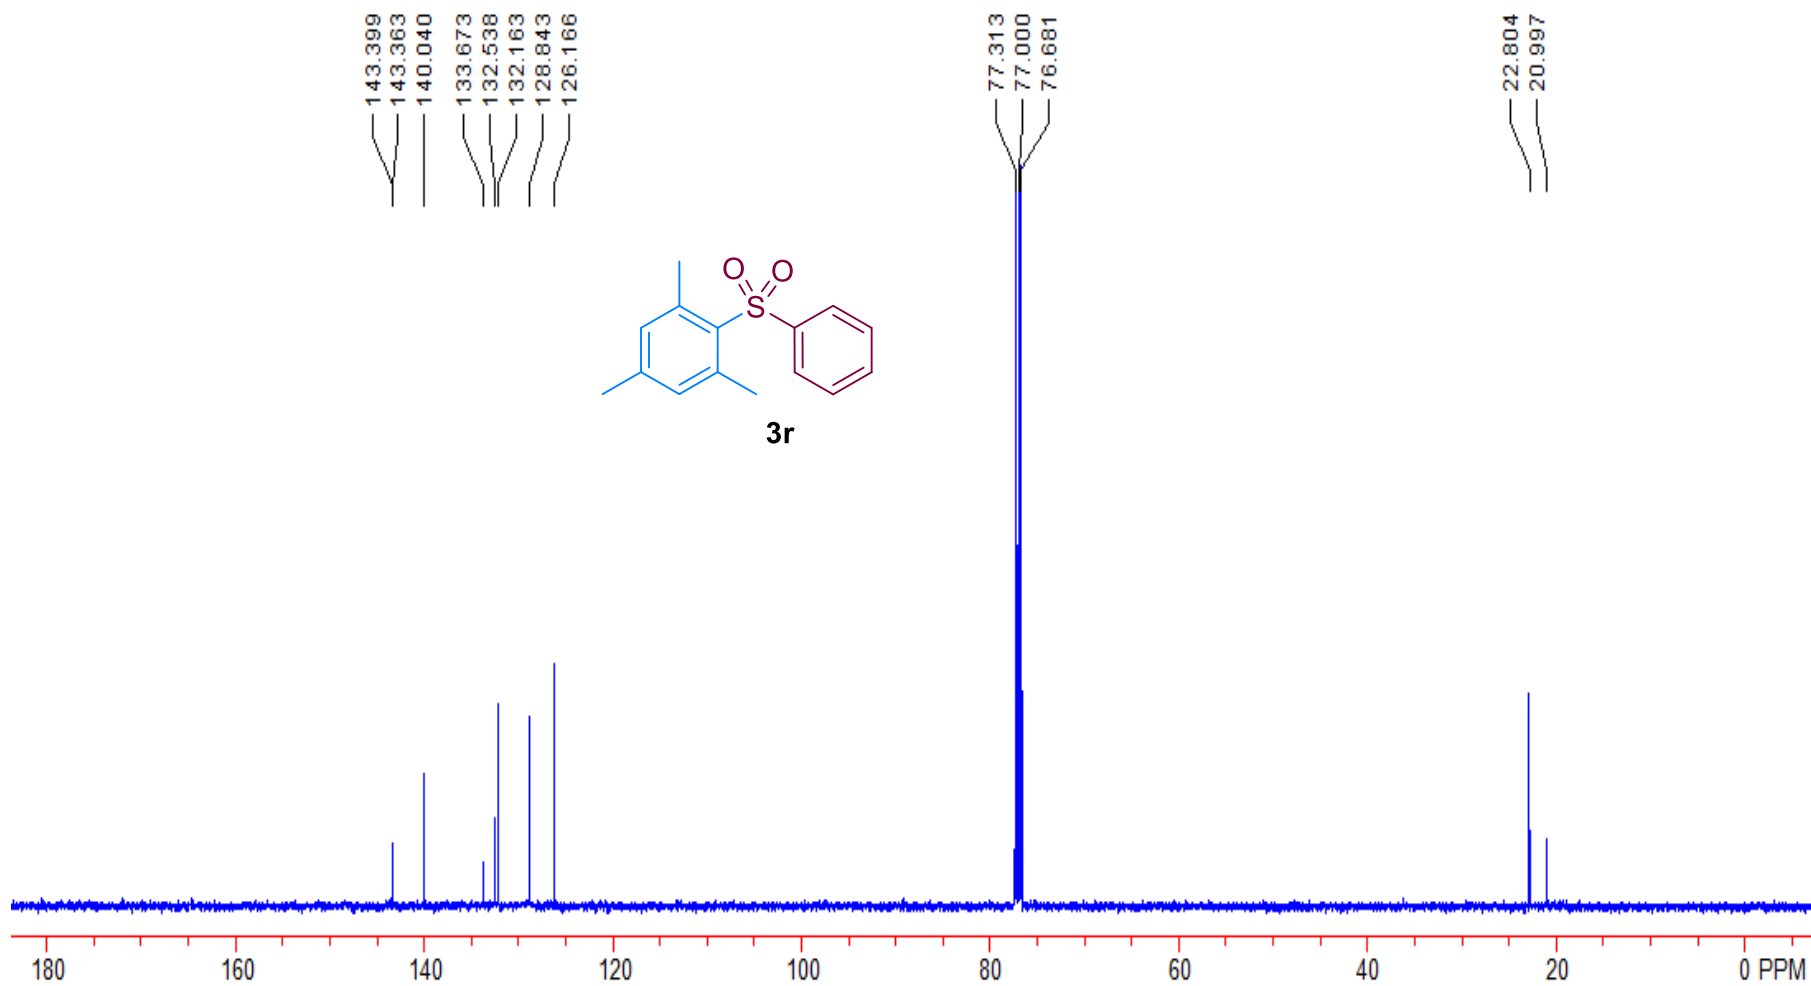

7.871  
7.866  
7.854  
7.849  
7.818  
7.798  
7.471  
7.465  
7.454  
7.448  
7.317  
7.297  
7.261

2.405

1.548

-0.000

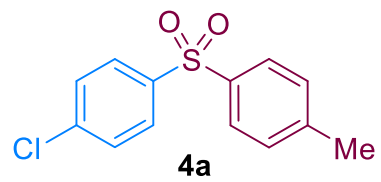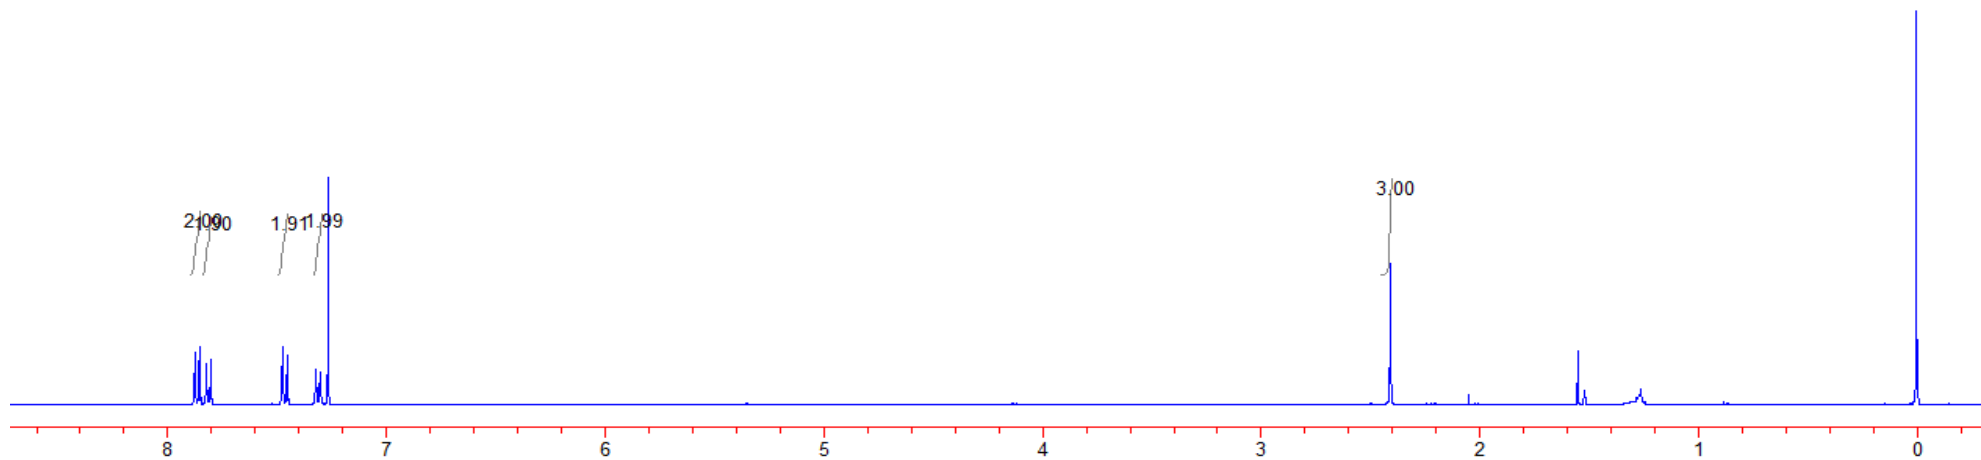

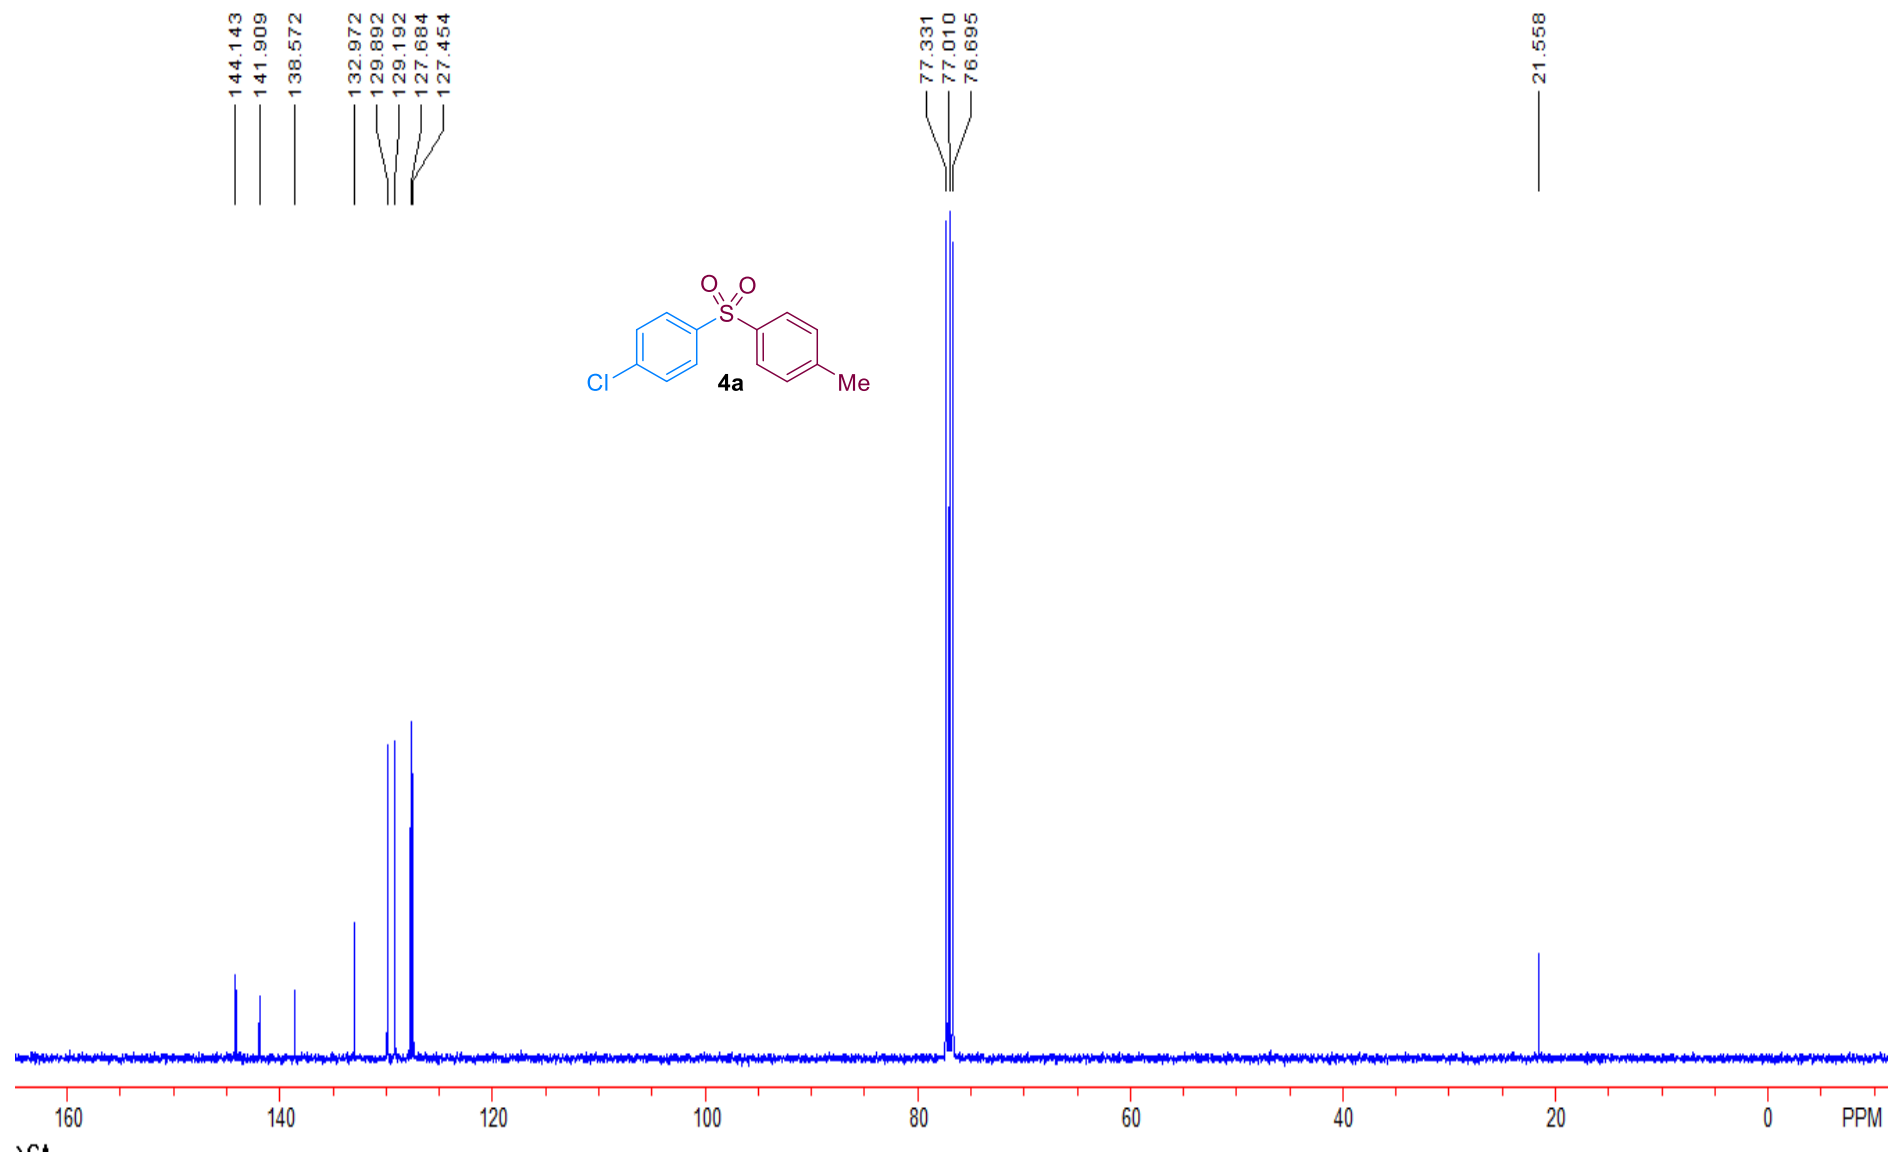



7.962  
7.948  
7.940  
7.927  
7.822  
7.801  
7.316  
7.296  
7.283  
7.184  
7.163  
7.142

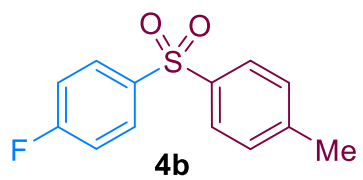

2.404

-0.000

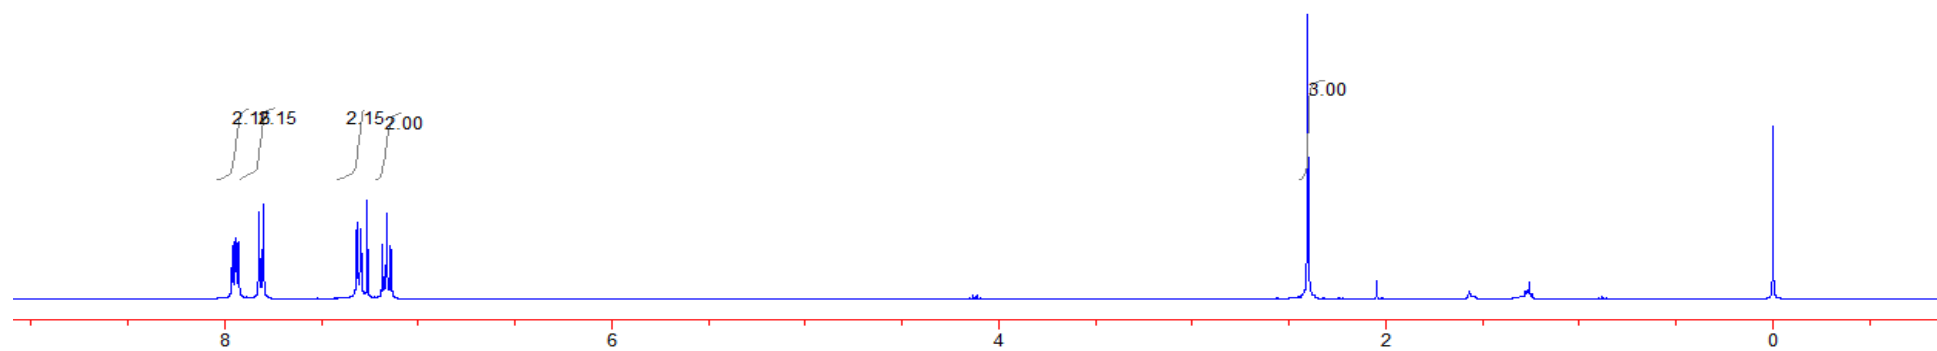

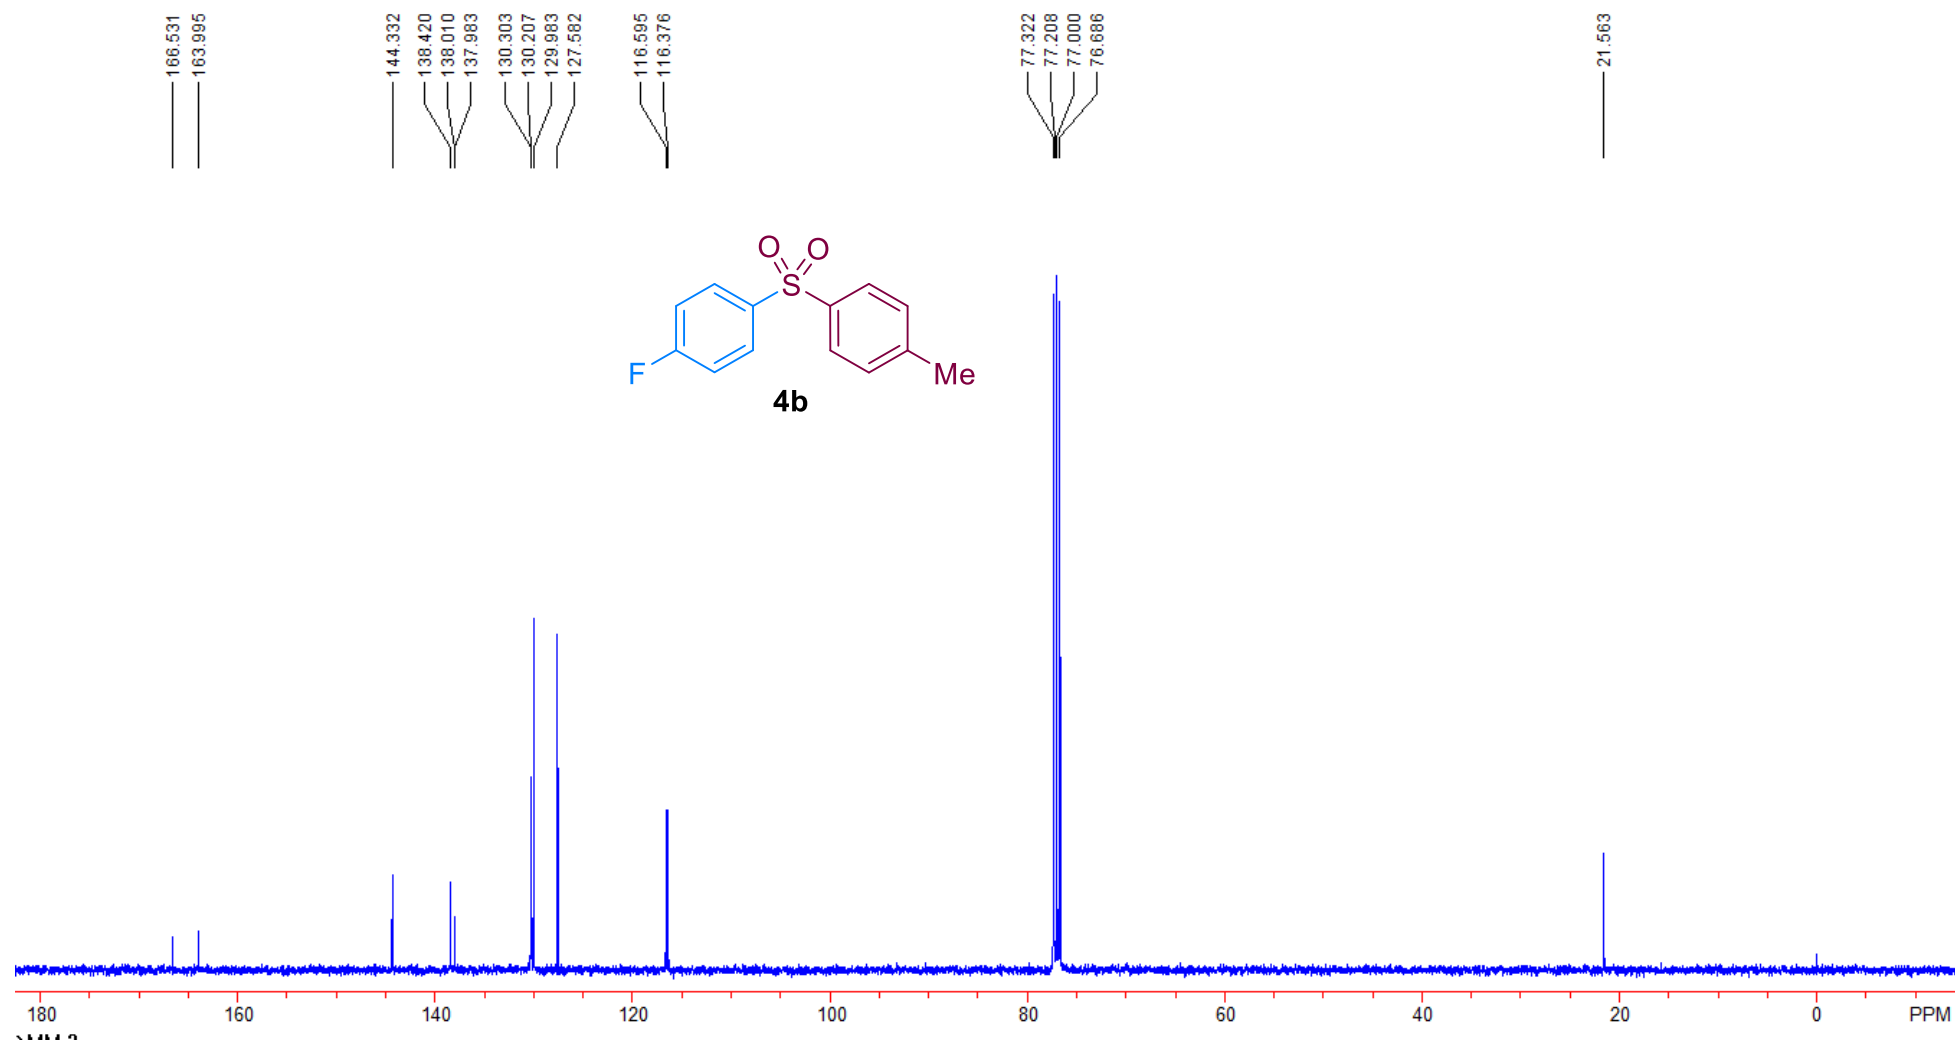

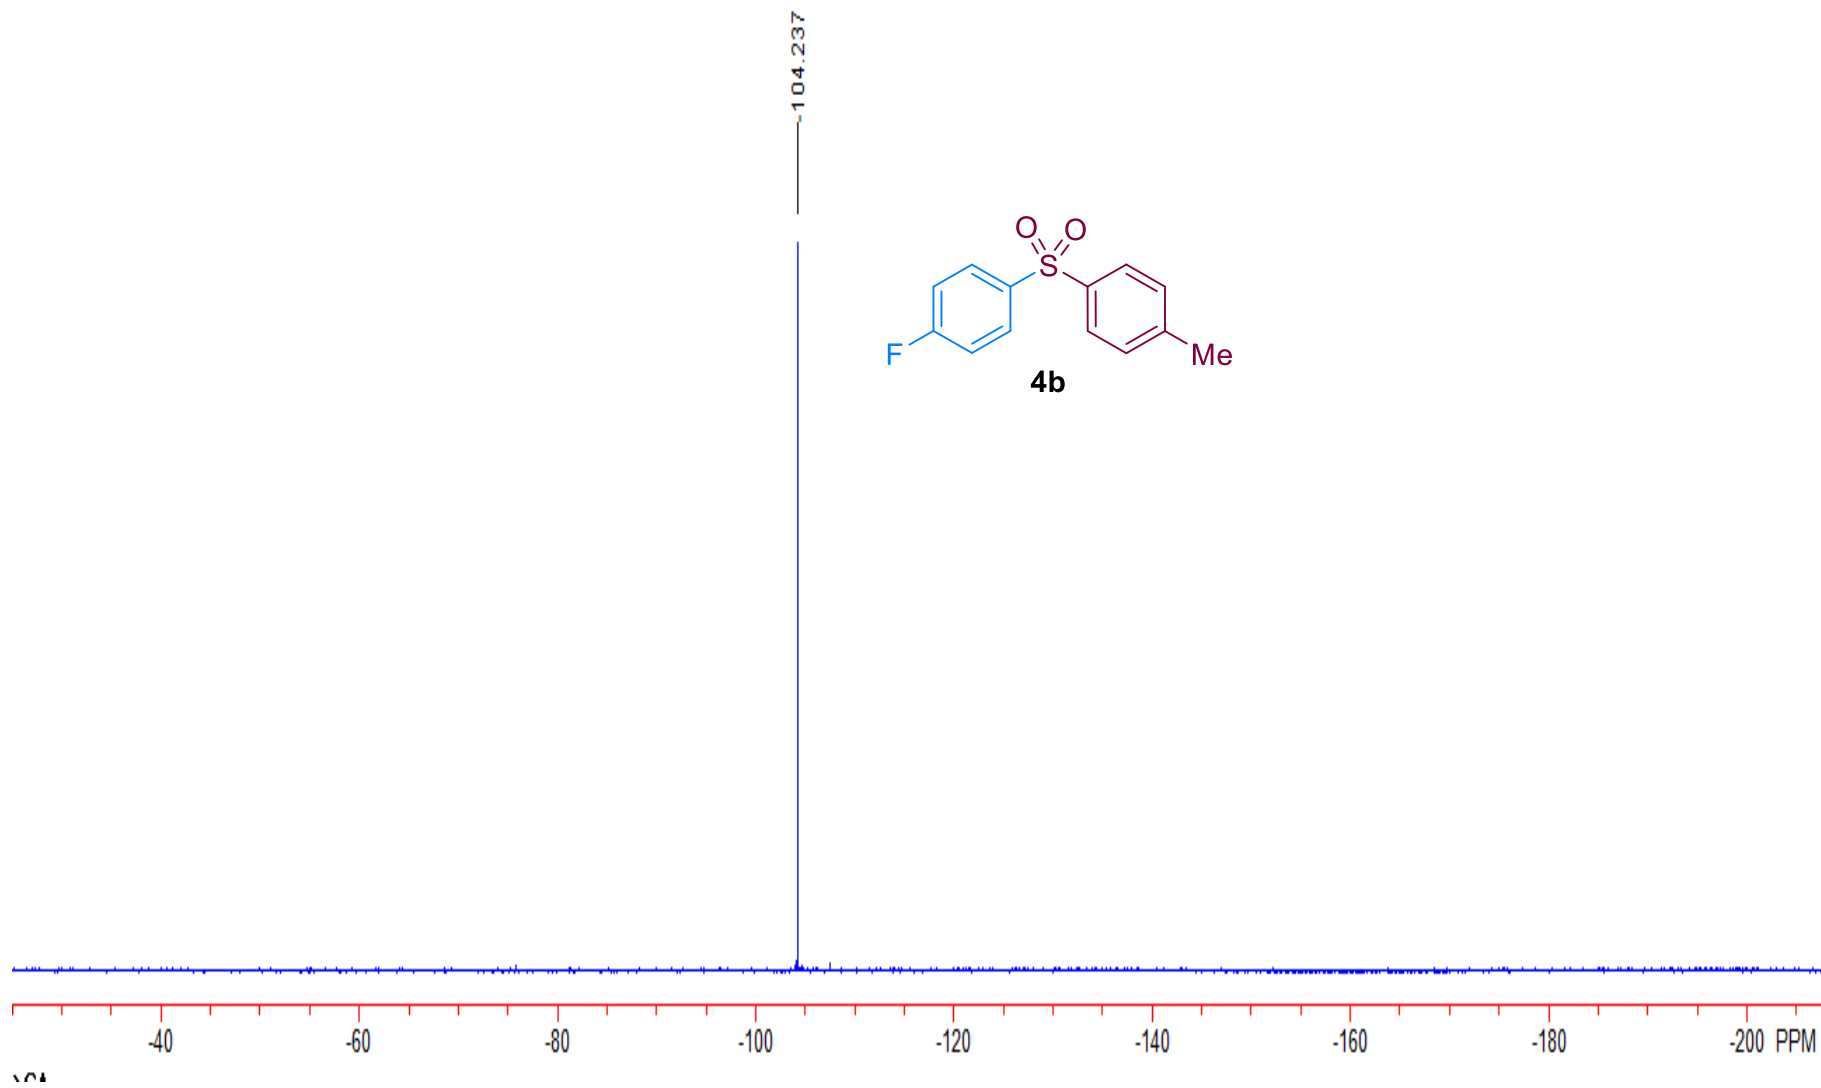

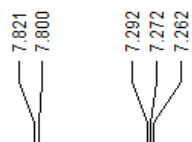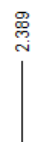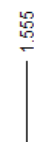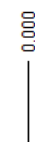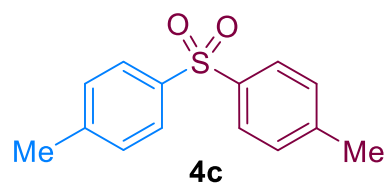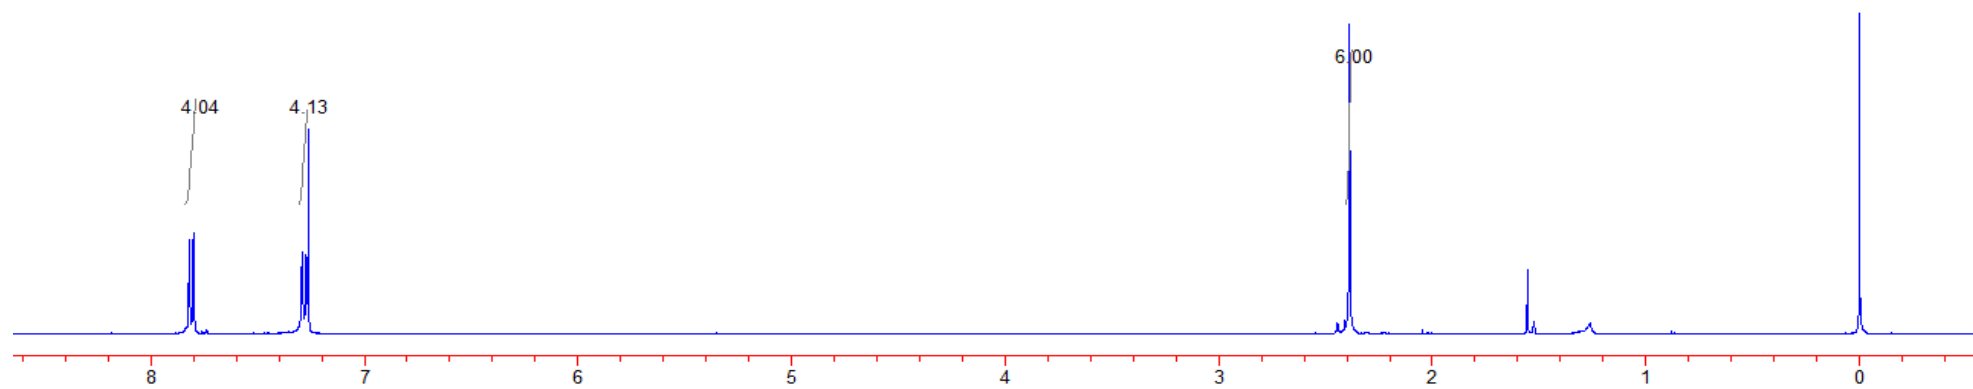

143.782  
138.747  
129.669  
127.283

77.325  
77.000  
76.687

21.322

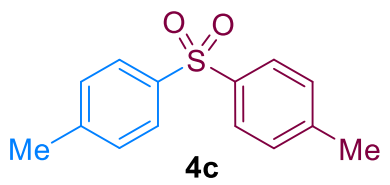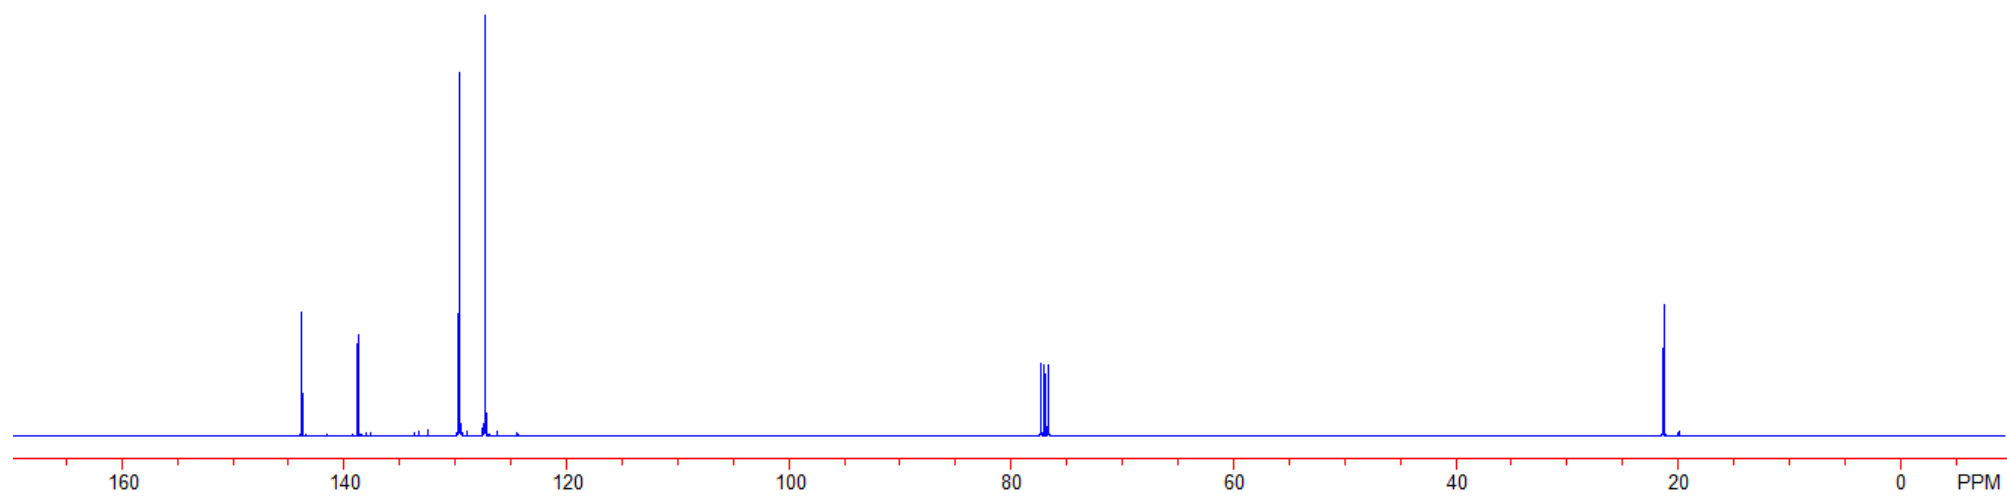

8.205  
8.202  
8.186  
8.183  
7.758  
7.738  
7.469  
7.466  
7.384  
7.302  
7.282  
7.262  
7.230

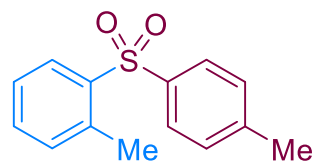

4c (minor)

2.444  
2.410

-0.000

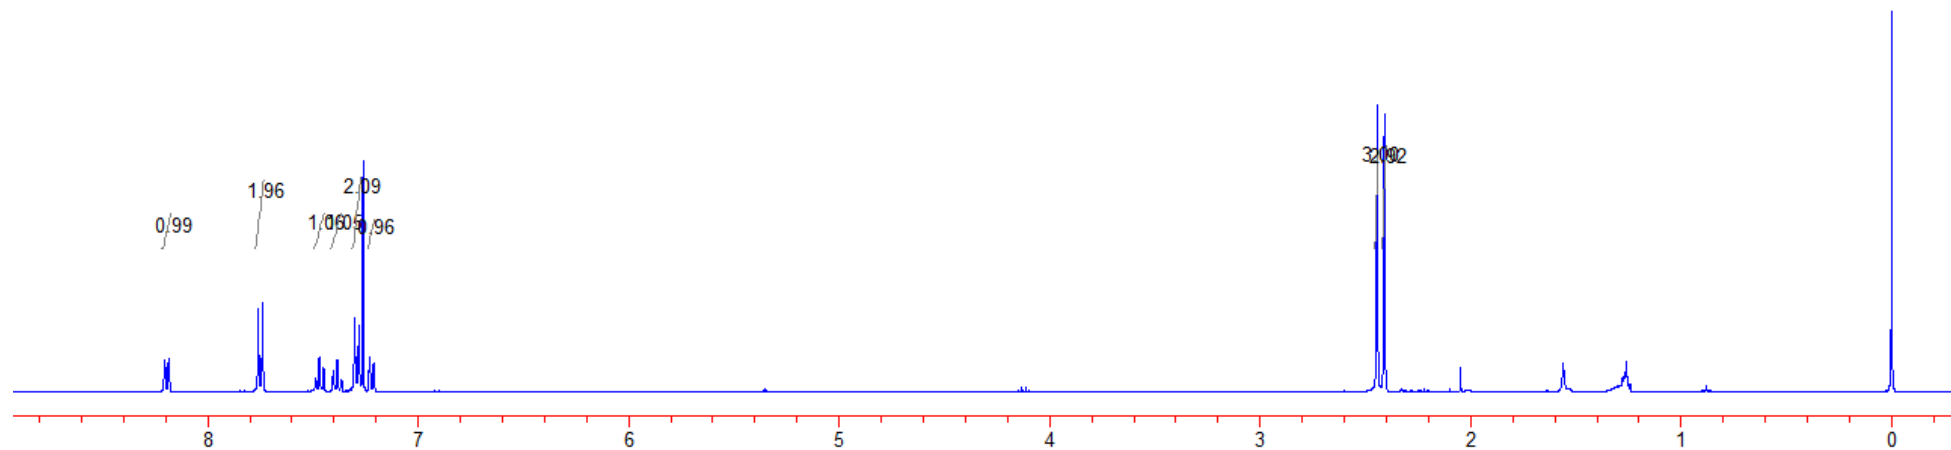

143.914  
139.002  
138.104  
137.760  
133.406  
132.547  
129.575  
129.159  
127.657  
126.352

77.312  
77.000  
76.681

21.521  
20.129

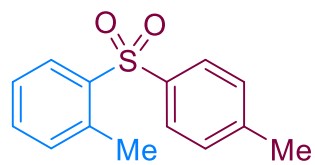

4c (minor)

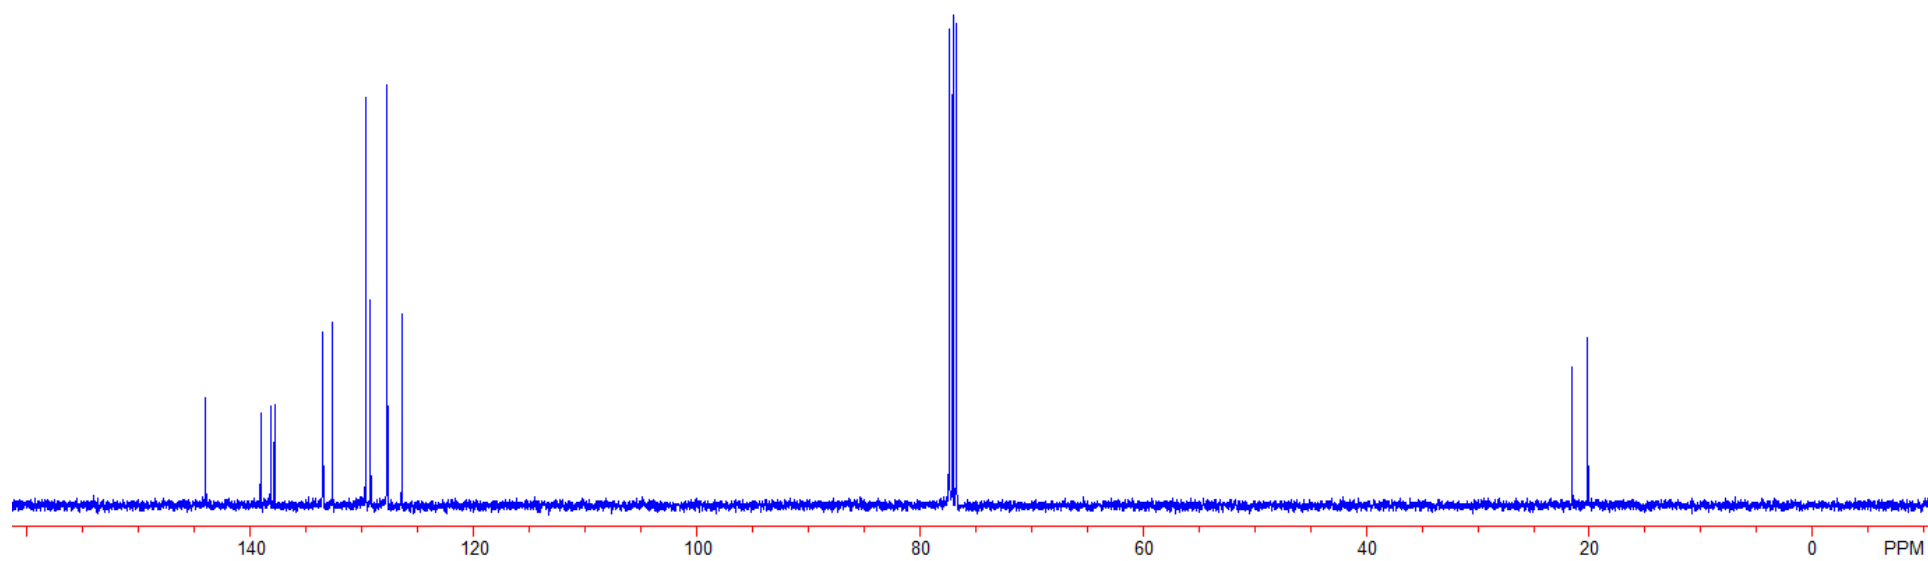

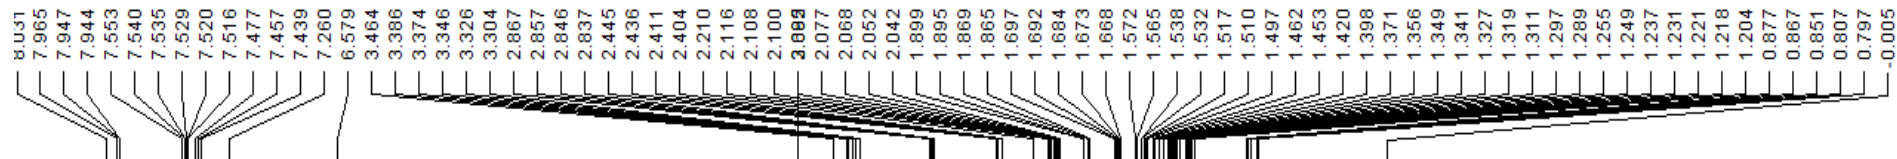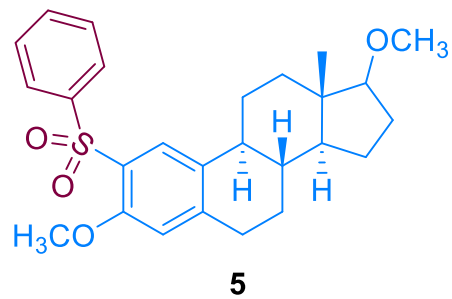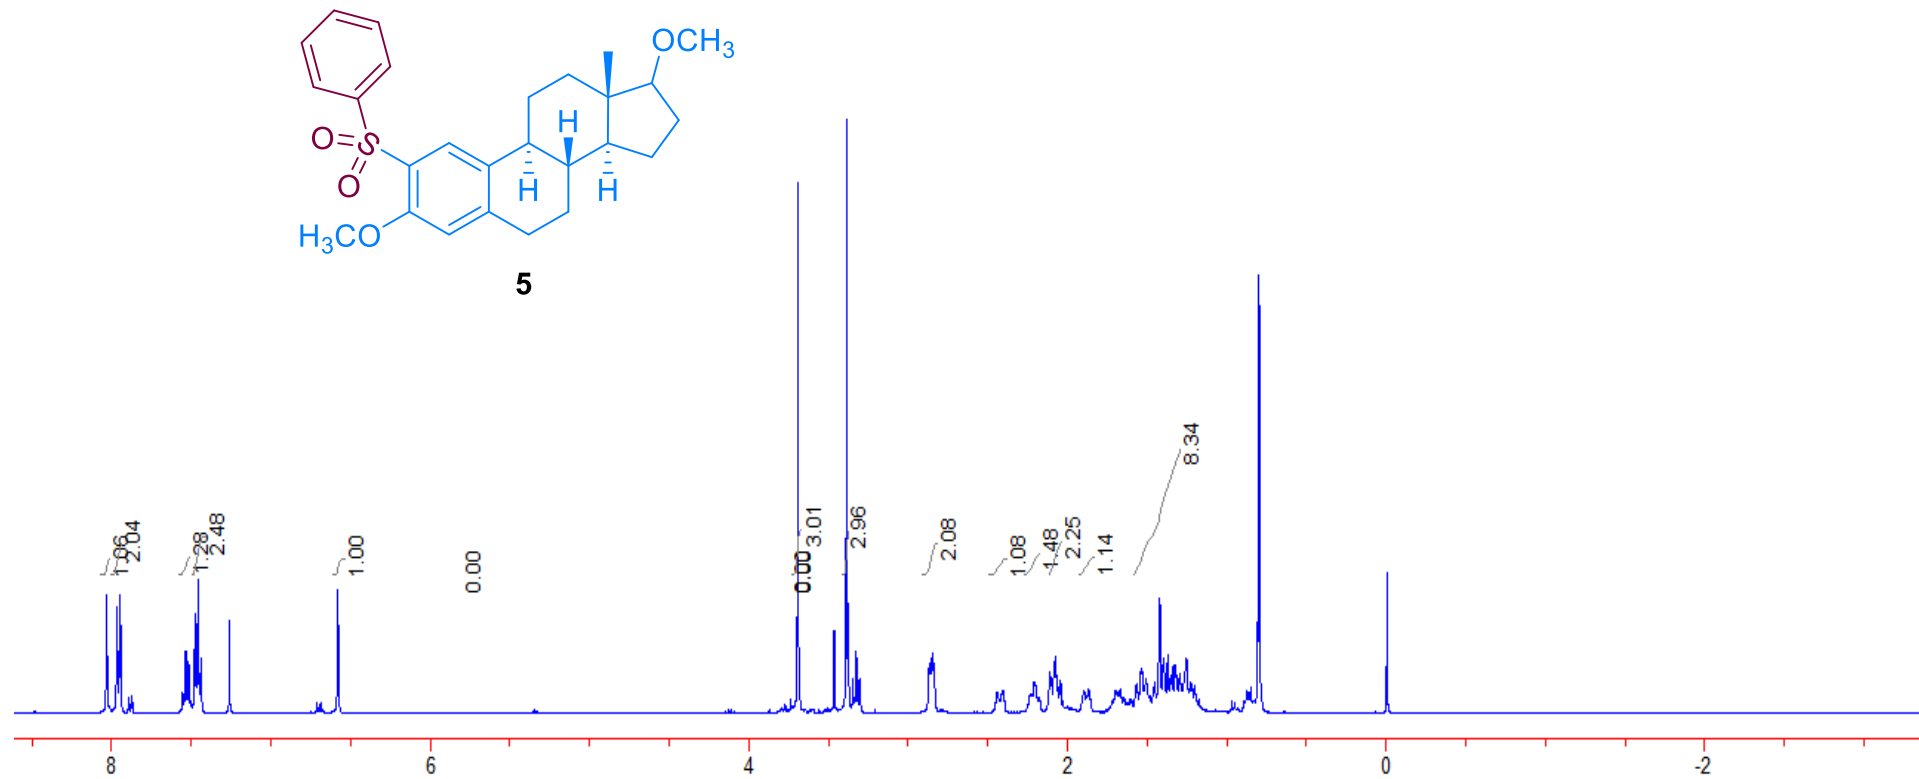



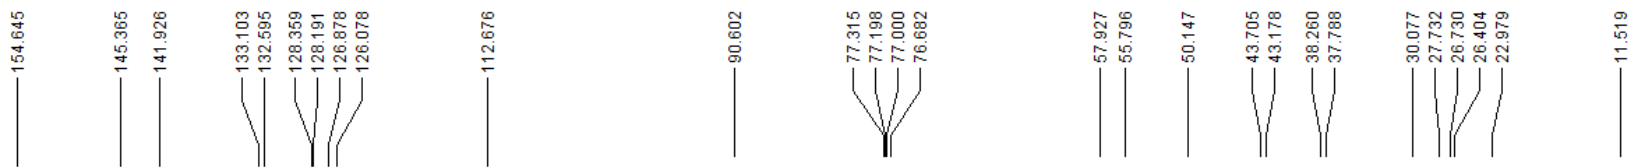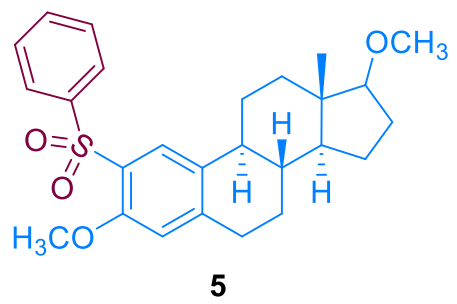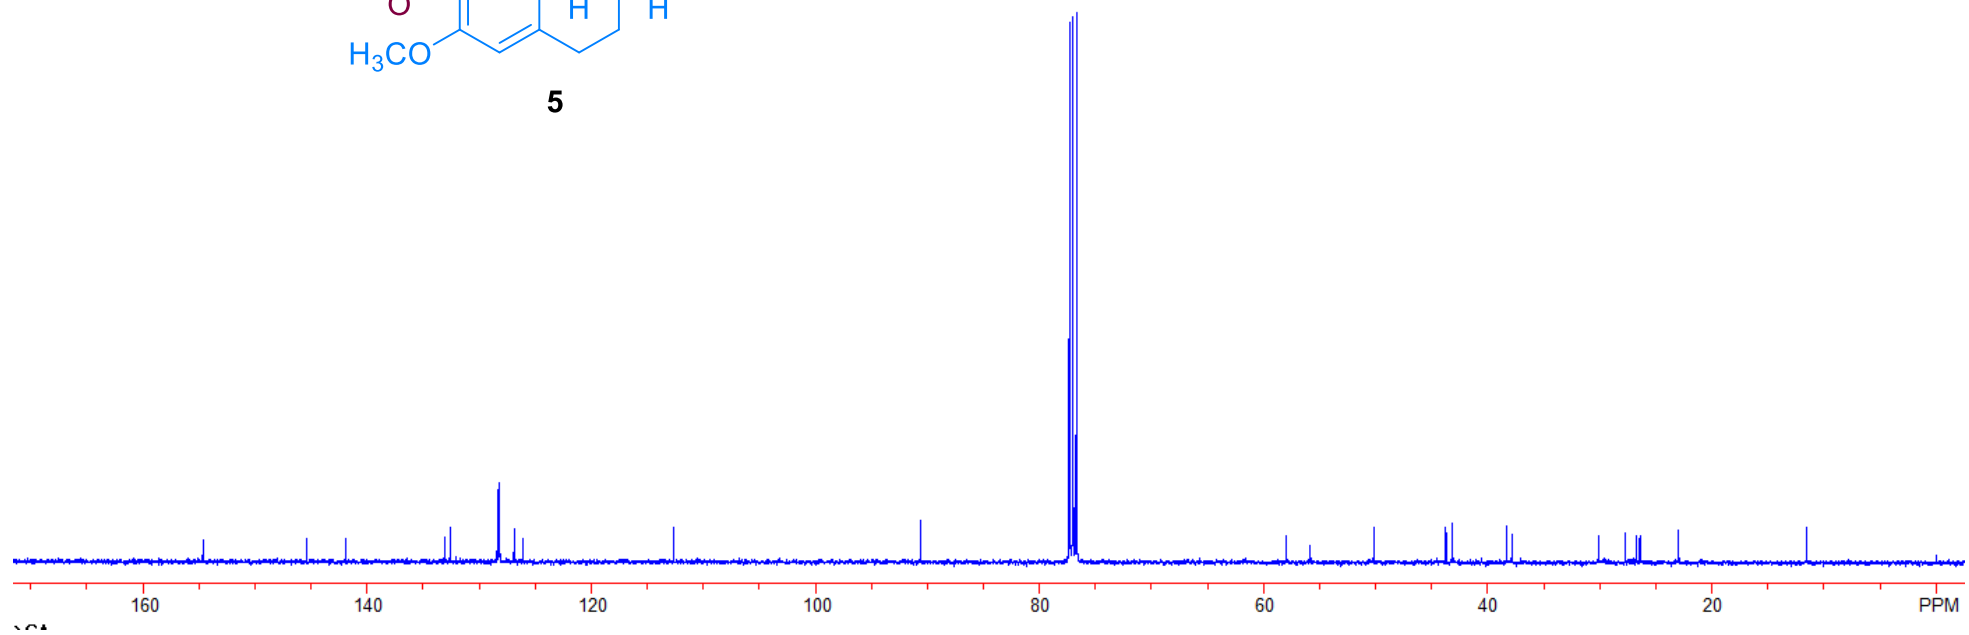

8.090  
8.069  
7.858  
7.855  
7.841  
7.837  
7.597  
7.578  
7.537  
7.533  
7.516  
7.513  
7.495  
7.404  
7.401  
7.262

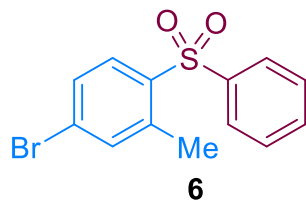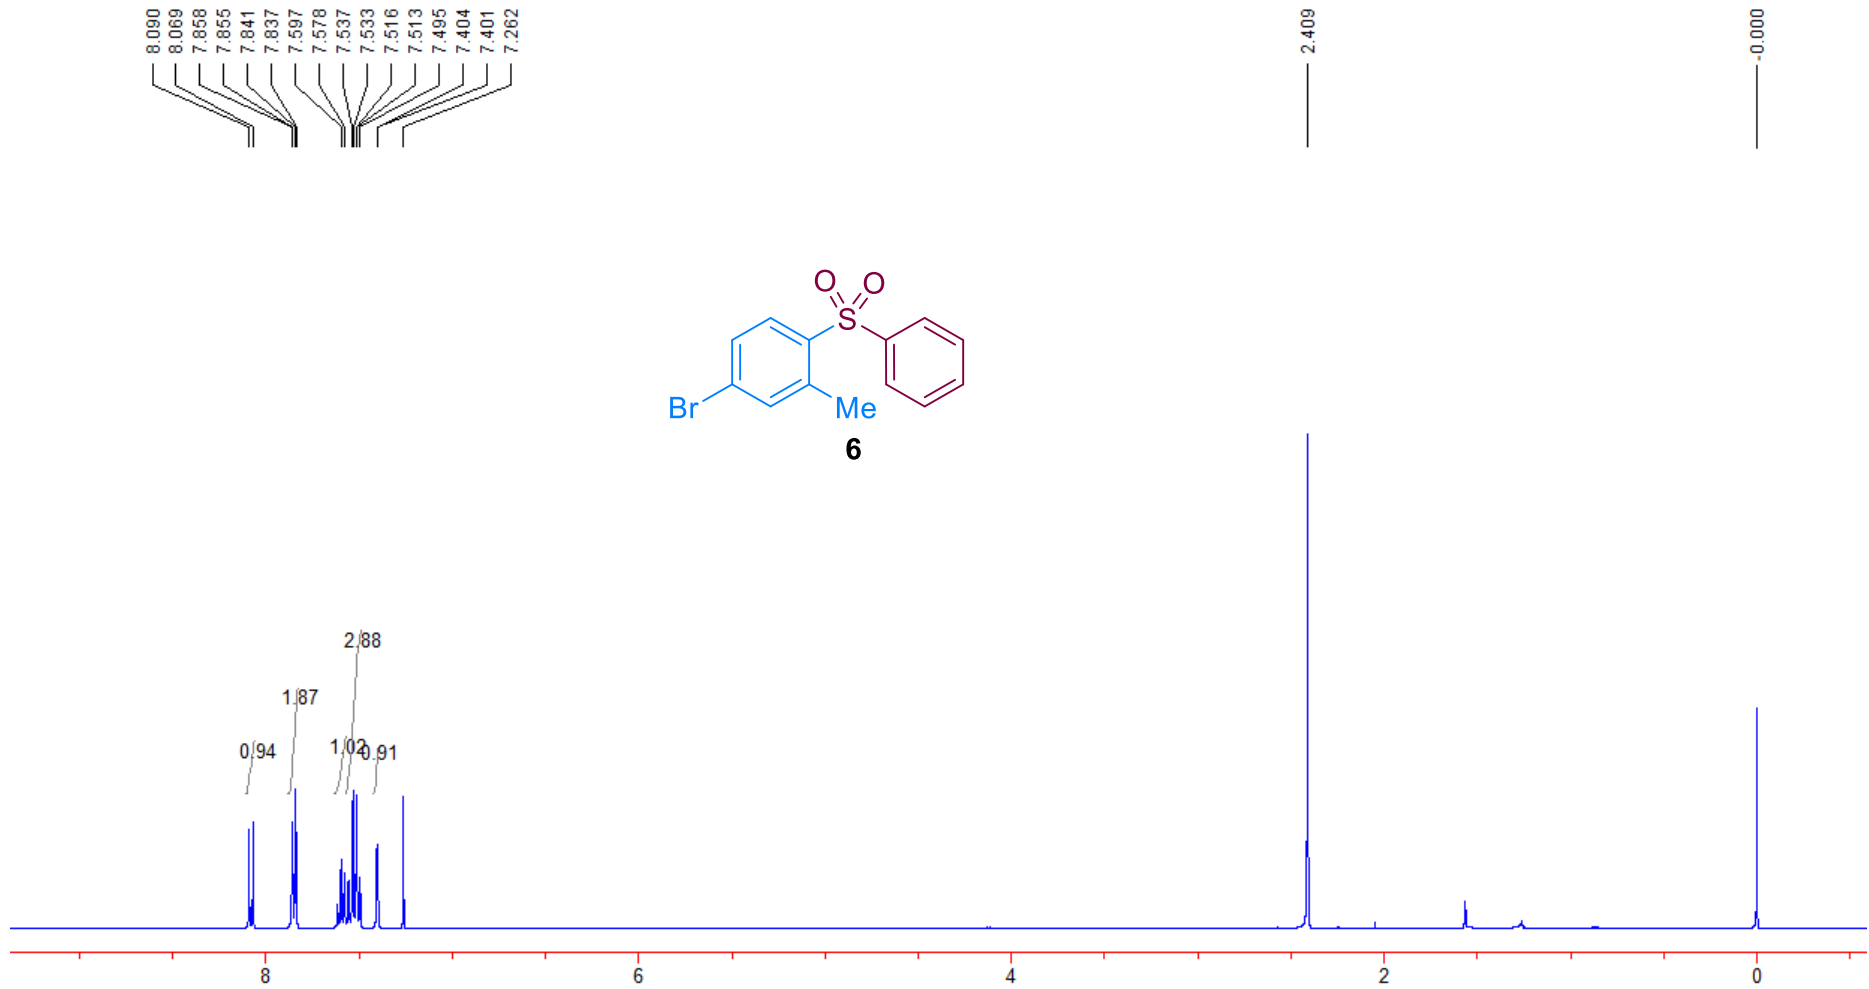

140.765  
139.869  
137.960  
135.421  
133.249  
130.890  
129.653  
129.112  
128.497  
127.611

77.318  
77.000  
76.682

19.379

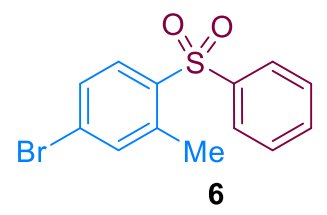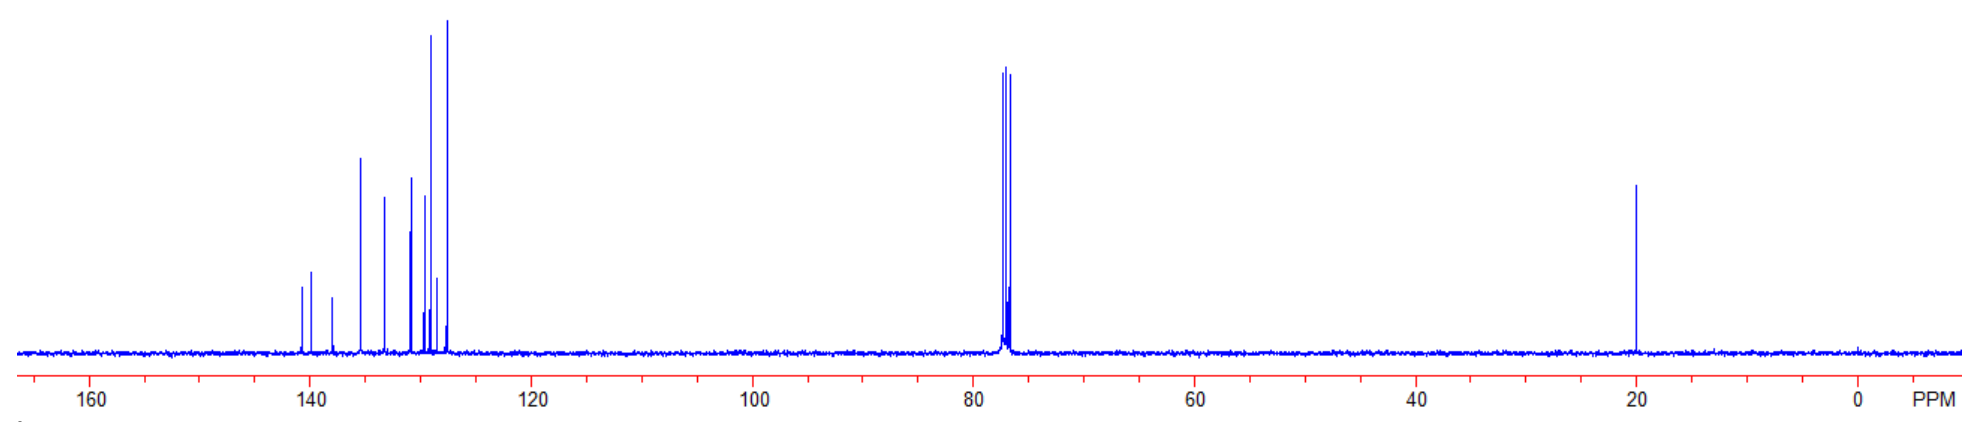

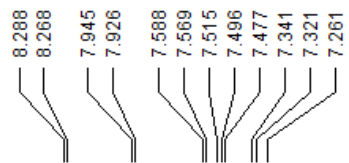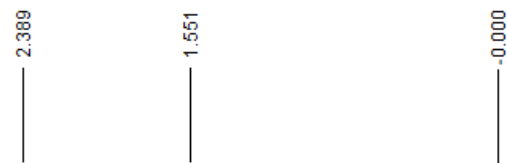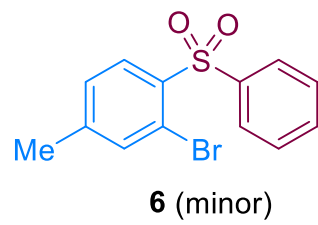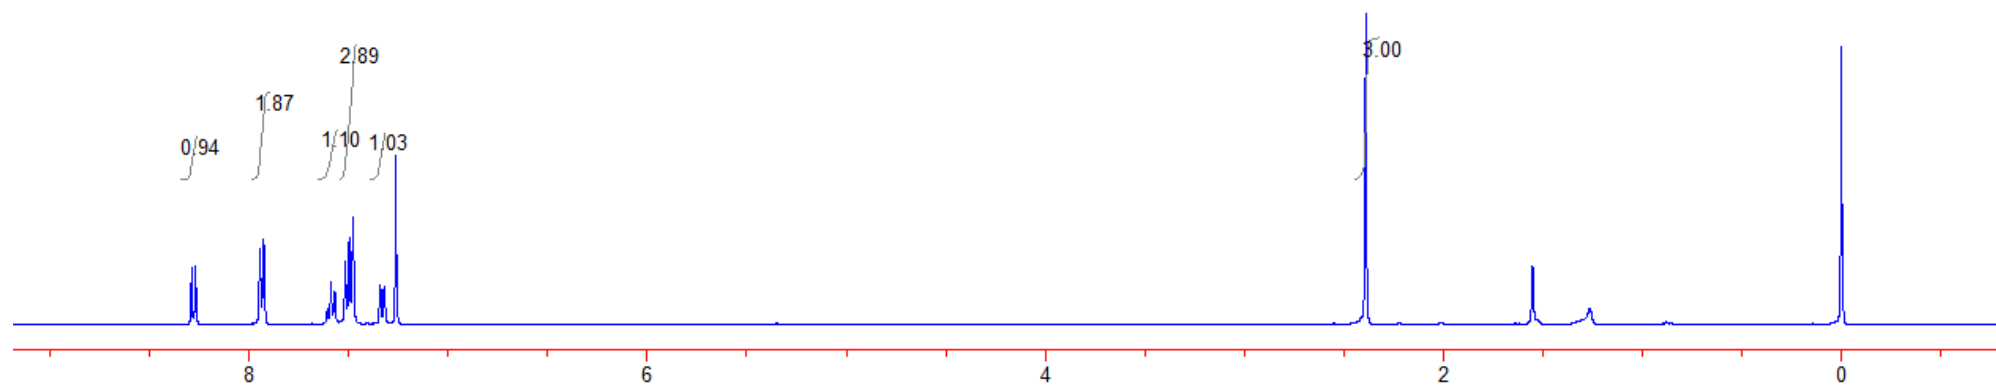

145.974  
140.178  
136.884  
136.000  
133.182  
131.334  
128.726  
128.519  
128.430  
120.882

77.318  
77.000  
76.883

21.041

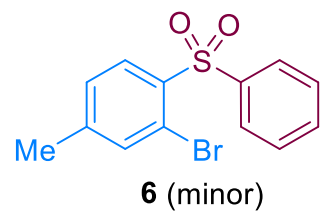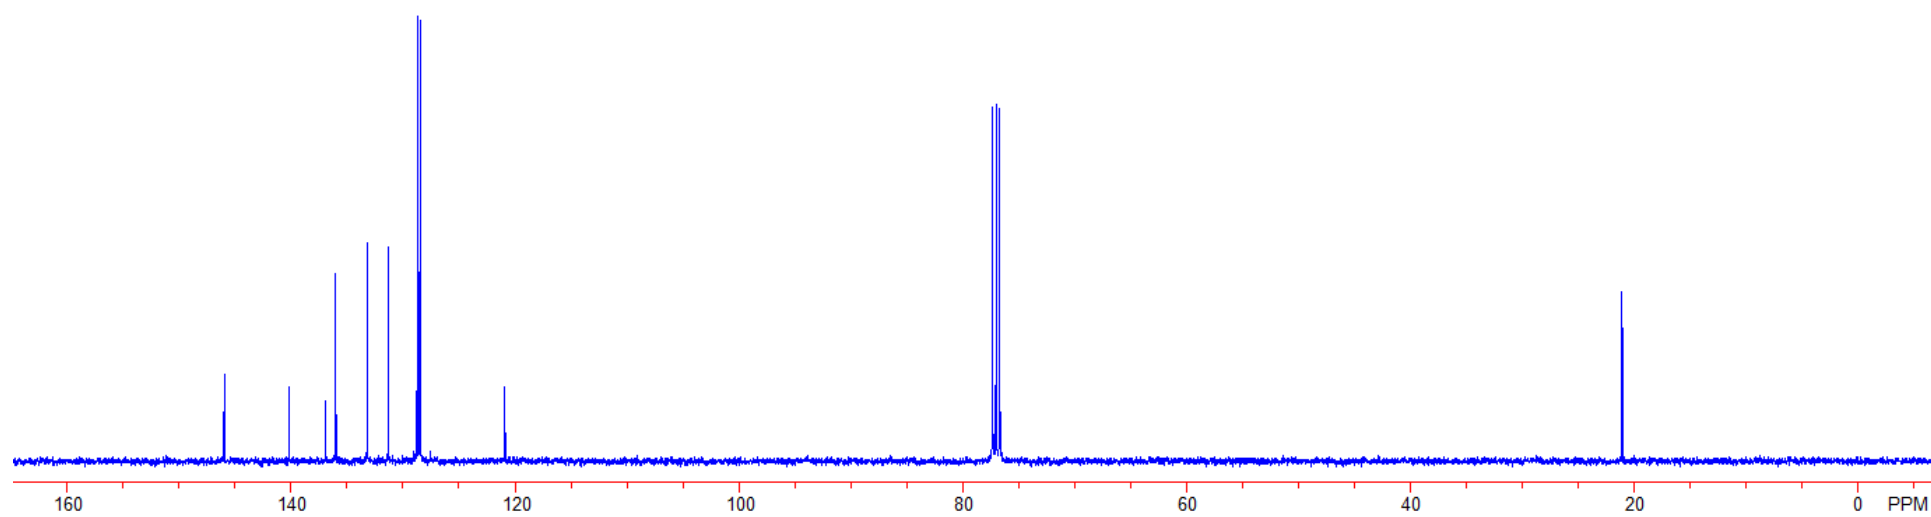

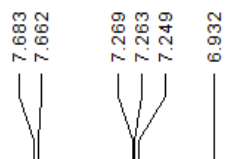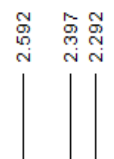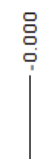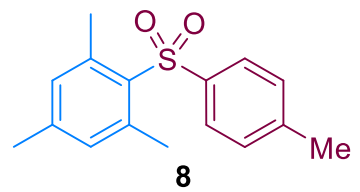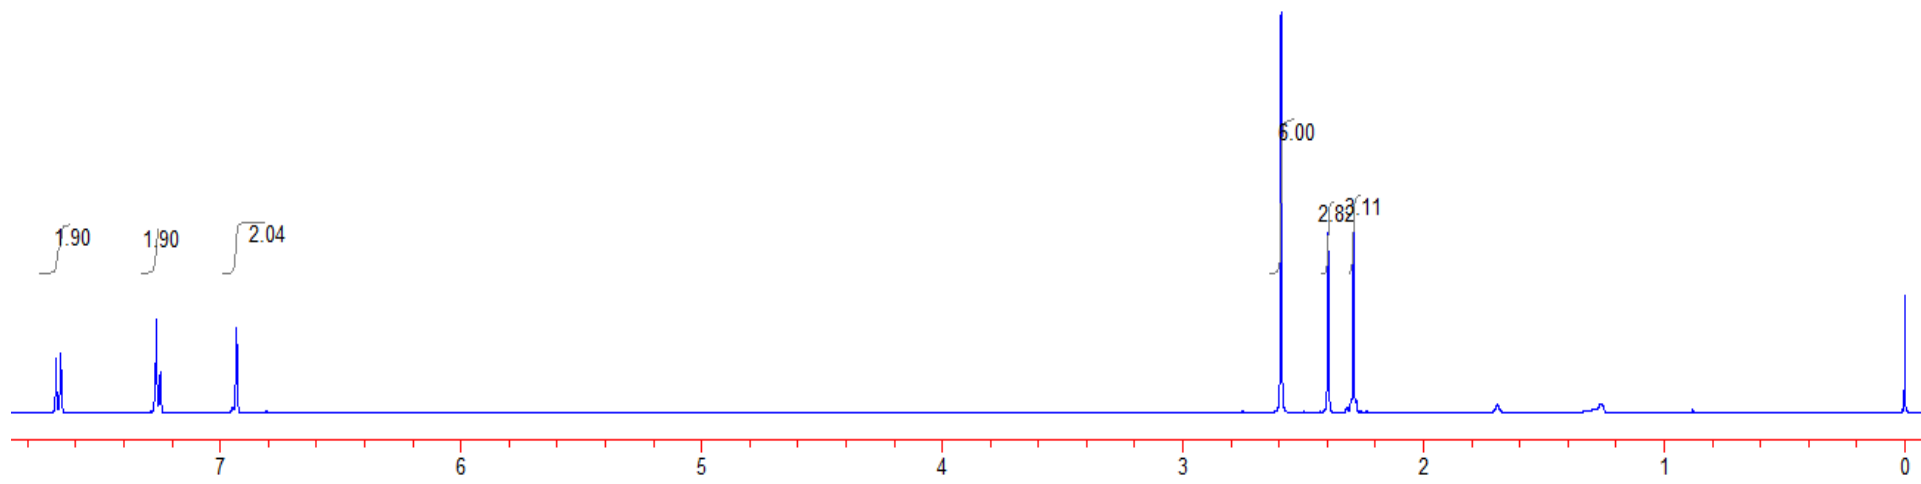

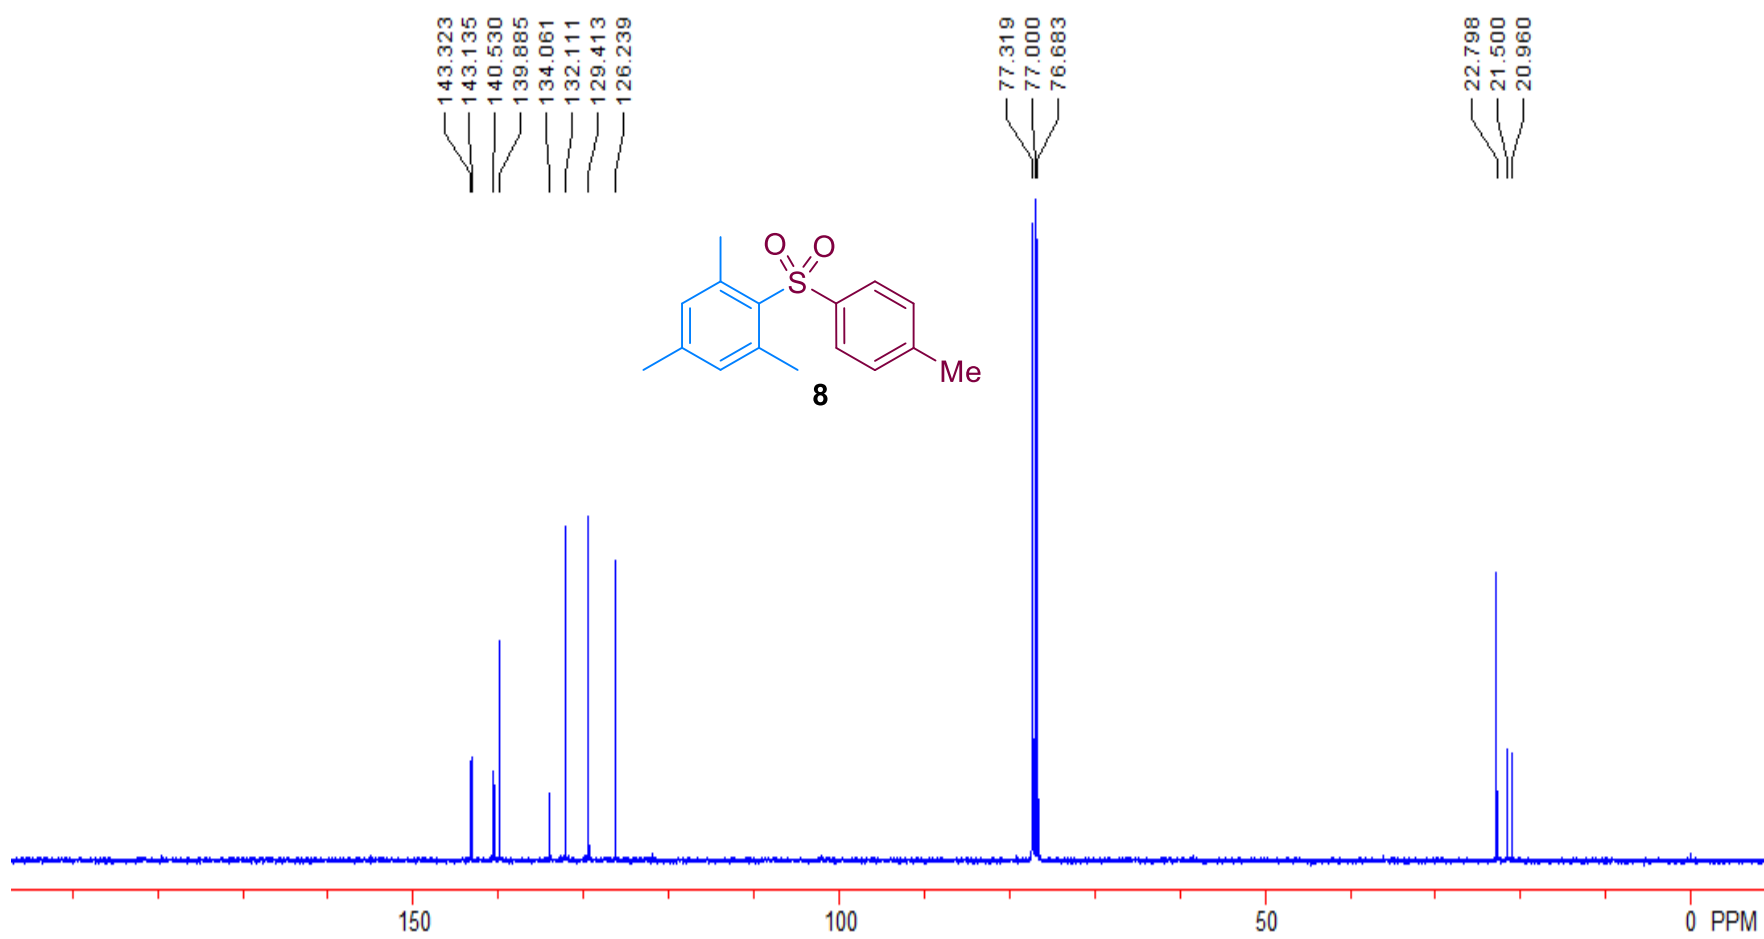

Supplement: d1ob02209a1.pdf [file d1ob02209a1.pdf]
